# Supplementary material for: Effect of mechanical damage and wound healing on the viscoelastic properties of stems of flax cultivars (Linum usitatissimum L. cv. Eden and cv. Drakkar)
Source: PLOS journal article supplement (doi:10.1371/journal.pone.0185958), 2017-10-05
Supplement: S1 (10.1371/journal.pone.0185958.s001) [file journal.pone.0185958.s001]

**S1 Fig. Full models and final models obtained after the model building approach for each parameter. Only significant terms were retained in final models.**

**Legends:**

LogSM is Log(storage modulus)  
 LogSTF is Log(stiffness)  
 LogSTRAIN is Log(strain)  
 type is type of wound  
 cv is cultivar of *Linum usitatissimum*  
 sample is individual

**1 - Full models used to start the model-building approach:**

**(a) Storage Modulus**

LogSM~LogSTRAIN\*type\*cv+(LogSTRAIN\*type\*cv|pot/sample)

**(b) Stiffness**

LogSTF~LogSTRAIN\*type\*cv+(LogSTRAIN\*type\*cv|pot/sample)

**(c) Tan Delta**

tan delta~strain\*type\*cv+(strain\*type\*cv|pot/sample)

**(d) Plant Height at 95 DAS**

H\_95DAS~type\*cv+(1|pot/sample))

**(e) Plant Diameter at 95 DAS**

diam~type\*cv+(1|pot/sample)

**2 - Final models retained after both random and fixed effects checking:**

**(a) Storage Modulus**

LogSM~LogSTRAIN+type+cv+LogSTRAIN:type + LogSTRAIN:cv+(LogSTRAIN|sample)

**(b) Stiffness**

LogSTF~LogSTRAIN+type+cv+LogSTRAIN:type + LogSTRAIN:cv+(LogSTRAIN|sample)

**(c) Tan Delta**

lmer(tan delta~strain+type+cv+strain:cv+(strain|sample)

**(d) Plant Height at 95 DAS**

H\_95DAS~type\*cv+(1|pot/sample))

**(e) Plant Diameter at 95 DAS**

diam~type\*cv+(1|pot/sample)
