# Supplementary material for: Effect of mechanical damage and wound healing on the viscoelastic properties of stems of flax cultivars (Linum usitatissimum L. cv. Eden and cv. Drakkar)
Source: PLoS One. 2017 Oct 5;12(10):e0185958. doi: 10.1371/journal.pone.0185958 (PMC5628913; doi:10.1371/journal.pone.0185958)
Supplement: S1 Table — (XLS) [file pone.0185958.s002.xls]

## Sheet: Total_R _with_morphology_pot 2.
sample	var	type	pot	point	amplitude	length	strain_perc	storage_modulus	loss_modulus	tan_delta	stiffness	diamA	diamB	H_69DAS	H_wound_69DAS	H_95DAS	H_wound_95DAS
Dr_C02_A	DR	C	1	1	0.5	14350	0.00348432	1100	116.3	0.1057	279307	2.168	2.14	30	25	80	25
Dr_C02_A	DR	C	1	2	1.069	14350	0.00744948	1068	114.6	0.1073	271210	2.168	2.14	30	25	80	25
Dr_C02_A	DR	C	1	3	1.638	14350	0.0114146	1055	117.1	0.111	267896	2.168	2.14	30	25	80	25
Dr_C02_A	DR	C	1	4	2.209	14350	0.0153937	1037	129.2	0.1246	263280	2.168	2.14	30	25	80	25
Dr_C02_A	DR	C	1	5	2.773	14350	0.019324	1007	132.1	0.1311	255778	2.168	2.14	30	25	80	25
Dr_C02_A	DR	C	1	6	3.343	14350	0.0232962	998.1	127.4	0.1276	253449	2.168	2.14	30	25	80	25
Dr_C02_A	DR	C	1	7	3.913	14350	0.0272683	981.6	143.4	0.1461	249255	2.168	2.14	30	25	80	25
Dr_C02_A	DR	C	1	8	4.486	14350	0.0312613	962.3	135.6	0.1409	244359	2.168	2.14	30	25	80	25
Dr_C02_A	DR	C	1	9	5.053	14350	0.0352125	945.9	153.7	0.1625	240189	2.168	2.14	30	25	80	25
Dr_C02_A	DR	C	1	10	5.62	14350	0.0391638	931.5	146.2	0.1569	236550	2.168	2.14	30	25	80	25
Dr_C02_A	DR	C	1	11	6.189	14350	0.0431289	912.6	155.1	0.17	231753	2.168	2.14	30	25	80	25
Dr_C02_A	DR	C	1	12	6.764	14350	0.0471359	903.6	155.3	0.1719	229469	2.168	2.14	30	25	80	25
Dr_C02_A	DR	C	1	13	7.331	14350	0.0510871	888.8	152.2	0.1712	225694	2.168	2.14	30	25	80	25
Dr_C02_A	DR	C	1	14	7.898	14350	0.0550383	871.4	153.6	0.1763	221285	2.168	2.14	30	25	80	25
Dr_C02_A	DR	C	1	15	8.468	14350	0.0590105	859	159.8	0.186	218141	2.168	2.14	30	25	80	25
Dr_C02_A	DR	C	1	16	9.038	14350	0.0629826	851.9	159.2	0.1868	216330	2.168	2.14	30	25	80	25
Dr_C02_A	DR	C	1	17	9.605	14350	0.0669338	841.1	157.8	0.1876	213582	2.168	2.14	30	25	80	25
Dr_C02_A	DR	C	1	18	10.18	14350	0.0709408	830.6	156.7	0.1887	210913	2.168	2.14	30	25	80	25
Dr_C02_A	DR	C	1	19	10.75	14350	0.0749129	819.2	156.1	0.1905	208023	2.168	2.14	30	25	80	25
Dr_C02_A	DR	C	1	20	11.32	14350	0.078885	808.7	156.9	0.194	205350	2.168	2.14	30	25	80	25
Dr_C02_A	DR	C	1	21	11.89	14350	0.0828571	799.4	158.3	0.198	202997	2.168	2.14	30	25	80	25
Dr_C02_A	DR	C	1	22	12.46	14350	0.0868293	791.7	159.9	0.202	201031	2.168	2.14	30	25	80	25
Dr_C02_A	DR	C	1	23	13.02	14350	0.0907317	785	160.9	0.205	199353	2.168	2.14	30	25	80	25
Dr_C02_A	DR	C	1	24	13.59	14350	0.0947038	778.9	160.8	0.2065	197801	2.168	2.14	30	25	80	25
Dr_C02_A	DR	C	1	25	14.16	14350	0.098676	772.8	160.2	0.2073	196246	2.168	2.14	30	25	80	25
Dr_C02_A	DR	C	1	26	14.72	14350	0.102578	766.5	159.3	0.2078	194649	2.168	2.14	30	25	80	25
Dr_C02_A	DR	C	1	27	15.29	14350	0.106551	759.9	158.4	0.2084	192976	2.168	2.14	30	25	80	25
Dr_C02_A	DR	C	1	28	15.87	14350	0.110592	753	158.2	0.2101	191226	2.168	2.14	30	25	80	25
Dr_C02_A	DR	C	1	29	16.44	14350	0.114564	746.8	158.6	0.2123	189633	2.168	2.14	30	25	80	25
Dr_C02_A	DR	C	1	30	17.01	14350	0.118537	741.1	159.3	0.2149	188190	2.168	2.14	30	25	80	25
Dr_C02_B	DR	C	1	1	0.5001	14580	0.00343004	975.1	104.1	0.1068	230971	2.09	2.105	30	25	66.5	25
Dr_C02_B	DR	C	1	2	1.069	14580	0.00733196	939.1	109.5	0.1166	222450	2.09	2.105	30	25	66.5	25
Dr_C02_B	DR	C	1	3	1.639	14580	0.0112414	918.1	113.7	0.1238	217469	2.09	2.105	30	25	66.5	25
Dr_C02_B	DR	C	1	4	2.205	14580	0.0151235	907.5	111.5	0.1228	214973	2.09	2.105	30	25	66.5	25
Dr_C02_B	DR	C	1	5	2.774	14580	0.0190261	893.8	109	0.1219	211716	2.09	2.105	30	25	66.5	25
Dr_C02_B	DR	C	1	6	3.347	14580	0.0229561	892.2	114	0.1278	211350	2.09	2.105	30	25	66.5	25
Dr_C02_B	DR	C	1	7	3.914	14580	0.026845	870.4	120.8	0.1387	206192	2.09	2.105	30	25	66.5	25
Dr_C02_B	DR	C	1	8	4.484	14580	0.0307545	866.4	116.5	0.1345	205222	2.09	2.105	30	25	66.5	25
Dr_C02_B	DR	C	1	9	5.051	14580	0.0346433	851	125	0.1469	201596	2.09	2.105	30	25	66.5	25
Dr_C02_B	DR	C	1	10	5.624	14580	0.0385734	846.4	121.1	0.143	200489	2.09	2.105	30	25	66.5	25
Dr_C02_B	DR	C	1	11	6.189	14580	0.0424486	829.8	125.5	0.1512	196552	2.09	2.105	30	25	66.5	25
Dr_C02_B	DR	C	1	12	6.761	14580	0.0463717	824.3	129.2	0.1567	195255	2.09	2.105	30	25	66.5	25
Dr_C02_B	DR	C	1	13	7.332	14580	0.0502881	816.8	126.6	0.1551	193481	2.09	2.105	30	25	66.5	25
Dr_C02_B	DR	C	1	14	7.899	14580	0.054177	803.6	125.7	0.1564	190351	2.09	2.105	30	25	66.5	25
Dr_C02_B	DR	C	1	15	8.467	14580	0.0580727	792.2	131.3	0.1657	187667	2.09	2.105	30	25	66.5	25
Dr_C02_B	DR	C	1	16	9.039	14580	0.0619959	787.9	132.9	0.1687	186628	2.09	2.105	30	25	66.5	25
Dr_C02_B	DR	C	1	17	9.608	14580	0.0658985	780.9	132.8	0.1701	184971	2.09	2.105	30	25	66.5	25
Dr_C02_B	DR	C	1	18	10.18	14580	0.0698217	773.5	132.2	0.171	183239	2.09	2.105	30	25	66.5	25
Dr_C02_B	DR	C	1	19	10.75	14580	0.0737311	765.4	131.8	0.1722	181299	2.09	2.105	30	25	66.5	25
Dr_C02_B	DR	C	1	20	11.32	14580	0.0776406	756.4	131.6	0.174	179170	2.09	2.105	30	25	66.5	25
Dr_C02_B	DR	C	1	21	11.89	14580	0.0815501	748.3	132.9	0.1776	177252	2.09	2.105	30	25	66.5	25
Dr_C02_B	DR	C	1	22	12.46	14580	0.0854595	741.6	134.6	0.1815	175661	2.09	2.105	30	25	66.5	25
Dr_C02_B	DR	C	1	23	13.03	14580	0.089369	735.5	136.2	0.1852	174224	2.09	2.105	30	25	66.5	25
Dr_C02_B	DR	C	1	24	13.59	14580	0.0932099	730.3	137.5	0.1882	172983	2.09	2.105	30	25	66.5	25
Dr_C02_B	DR	C	1	25	14.16	14580	0.0971193	725.6	137.8	0.1899	171869	2.09	2.105	30	25	66.5	25
Dr_C02_B	DR	C	1	26	14.7	14580	0.100823	721.1	138.2	0.1916	170807	2.09	2.105	30	25	66.5	25
Dr_C02_B	DR	C	1	27	15.3	14580	0.104938	715.7	137.3	0.1918	169534	2.09	2.105	30	25	66.5	25
Dr_C02_B	DR	C	1	28	15.87	14580	0.108848	710.3	136.5	0.1922	168256	2.09	2.105	30	25	66.5	25
Dr_C02_B	DR	C	1	29	16.44	14580	0.112757	704.9	136.5	0.1936	166974	2.09	2.105	30	25	66.5	25
Dr_C02_B	DR	C	1	30	17	14580	0.116598	699.7	137	0.1957	165751	2.09	2.105	30	25	66.5	25
Dr_C03_A	DR	C	2	1	0.4998	13840	0.00361127	1384	123.9	0.08951	226198	1.703	1.693	30	25	64	25.5
Dr_C03_A	DR	C	2	2	1.069	13840	0.00772399	1362	128.6	0.09444	222608	1.703	1.693	30	25	64	25.5
Dr_C03_A	DR	C	2	3	1.636	13840	0.0118208	1344	126	0.09371	219699	1.703	1.693	30	25	64	25.5
Dr_C03_A	DR	C	2	4	2.209	13840	0.015961	1337	135.7	0.1015	218463	1.703	1.693	30	25	64	25.5
Dr_C03_A	DR	C	2	5	2.776	13840	0.0200578	1306	155.6	0.1191	213474	1.703	1.693	30	25	64	25.5
Dr_C03_A	DR	C	2	6	3.344	13840	0.0241618	1288	143.8	0.1117	210451	1.703	1.693	30	25	64	25.5
Dr_C03_A	DR	C	2	7	3.916	13840	0.0282948	1276	158.1	0.1238	208592	1.703	1.693	30	25	64	25.5
Dr_C03_A	DR	C	2	8	4.481	13840	0.0323772	1253	151.3	0.1208	204758	1.703	1.693	30	25	64	25.5
Dr_C03_A	DR	C	2	9	5.053	13840	0.0365101	1238	167.1	0.135	202309	1.703	1.693	30	25	64	25.5
Dr_C03_A	DR	C	2	10	5.625	13840	0.0406431	1226	159.5	0.1301	200308	1.703	1.693	30	25	64	25.5
Dr_C03_A	DR	C	2	11	6.19	13840	0.0447254	1203	169.8	0.1411	196654	1.703	1.693	30	25	64	25.5
Dr_C03_A	DR	C	2	12	6.761	13840	0.0488512	1197	171.8	0.1436	195543	1.703	1.693	30	25	64	25.5
Dr_C03_A	DR	C	2	13	7.332	13840	0.0529769	1182	169.2	0.1431	193242	1.703	1.693	30	25	64	25.5
Dr_C03_A	DR	C	2	14	7.897	13840	0.0570592	1160	173.5	0.1495	189628	1.703	1.693	30	25	64	25.5
Dr_C03_A	DR	C	2	15	8.468	13840	0.061185	1152	181.2	0.1573	188237	1.703	1.693	30	25	64	25.5
Dr_C03_A	DR	C	2	16	9.045	13840	0.065354	1144	178.4	0.1559	187027	1.703	1.693	30	25	64	25.5
Dr_C03_A	DR	C	2	17	9.605	13840	0.0694003	1128	178.9	0.1586	184351	1.703	1.693	30	25	64	25.5
Dr_C03_A	DR	C	2	18	10.18	13840	0.0735549	1114	181.6	0.1631	182022	1.703	1.693	30	25	64	25.5
Dr_C03_A	DR	C	2	19	10.75	13840	0.0776734	1101	184.9	0.1679	179918	1.703	1.693	30	25	64	25.5
Dr_C03_A	DR	C	2	20	11.32	13840	0.0817919	1090	188.6	0.173	178205	1.703	1.693	30	25	64	25.5
Dr_C03_A	DR	C	2	21	11.89	13840	0.0859104	1081	192.1	0.1778	176589	1.703	1.693	30	25	64	25.5
Dr_C03_A	DR	C	2	22	12.46	13840	0.0900289	1072	194.5	0.1814	175205	1.703	1.693	30	25	64	25.5
Dr_C03_A	DR	C	2	23	13.02	13840	0.0940751	1064	195.5	0.1838	173857	1.703	1.693	30	25	64	25.5
Dr_C03_A	DR	C	2	24	13.59	13840	0.0981936	1055	195.6	0.1854	172426	1.703	1.693	30	25	64	25.5
Dr_C03_A	DR	C	2	25	14.16	13840	0.102312	1046	195.7	0.1871	170957	1.703	1.693	30	25	64	25.5
Dr_C03_A	DR	C	2	26	14.73	13840	0.106431	1036	196.1	0.1892	169358	1.703	1.693	30	25	64	25.5
Dr_C03_A	DR	C	2	27	15.3	13840	0.110549	1027	197.5	0.1923	167804	1.703	1.693	30	25	64	25.5
Dr_C03_A	DR	C	2	28	15.87	13840	0.114668	1018	199.4	0.1958	166394	1.703	1.693	30	25	64	25.5
Dr_C03_A	DR	C	2	29	16.44	13840	0.118786	1010	201.6	0.1996	165110	1.703	1.693	30	25	64	25.5
Dr_C03_A	DR	C	2	30	17.01	13840	0.122905	1004	203.6	0.2029	164041	1.703	1.693	30	25	64	25.5
Dr_C03_B	DR	C	2	1	0.4998	15510	0.00322244	833.2	69.26	0.08312	131585	1.763	1.77	29	24	65.5	24.5
Dr_C03_B	DR	C	2	2	1.067	15510	0.00687943	847.9	81.39	0.09599	133913	1.763	1.77	29	24	65.5	24.5
Dr_C03_B	DR	C	2	3	1.636	15510	0.010548	838.8	79.36	0.09461	132474	1.763	1.77	29	24	65.5	24.5
Dr_C03_B	DR	C	2	4	2.206	15510	0.0142231	831.8	72.08	0.08665	131370	1.763	1.77	29	24	65.5	24.5
Dr_C03_B	DR	C	2	5	2.777	15510	0.0179046	831	78.92	0.09497	131239	1.763	1.77	29	24	65.5	24.5
Dr_C03_B	DR	C	2	6	3.342	15510	0.0215474	815.4	84.8	0.104	128773	1.763	1.77	29	24	65.5	24.5
Dr_C03_B	DR	C	2	7	3.912	15510	0.0252224	812.9	80.39	0.0989	128379	1.763	1.77	29	24	65.5	24.5
Dr_C03_B	DR	C	2	8	4.481	15510	0.028891	807.3	89.85	0.1113	127497	1.763	1.77	29	24	65.5	24.5
Dr_C03_B	DR	C	2	9	5.052	15510	0.0325725	802.6	84.97	0.1059	126747	1.763	1.77	29	24	65.5	24.5
Dr_C03_B	DR	C	2	10	5.618	15510	0.0362218	795.4	92.77	0.1166	125612	1.763	1.77	29	24	65.5	24.5
Dr_C03_B	DR	C	2	11	6.191	15510	0.0399162	795	92.94	0.1169	125556	1.763	1.77	29	24	65.5	24.5
Dr_C03_B	DR	C	2	12	6.756	15510	0.043559	785.7	91.48	0.1164	124085	1.763	1.77	29	24	65.5	24.5
Dr_C03_B	DR	C	2	13	7.326	15510	0.047234	778.4	98.48	0.1265	122931	1.763	1.77	29	24	65.5	24.5
Dr_C03_B	DR	C	2	14	7.897	15510	0.0509155	777.7	100.4	0.1291	122825	1.763	1.77	29	24	65.5	24.5
Dr_C03_B	DR	C	2	15	8.467	15510	0.0545906	772.5	99.37	0.1286	122006	1.763	1.77	29	24	65.5	24.5
Dr_C03_B	DR	C	2	16	9.033	15510	0.0582398	764.5	100.8	0.1319	120737	1.763	1.77	29	24	65.5	24.5
Dr_C03_B	DR	C	2	17	9.604	15510	0.0619213	759.2	104	0.137	119895	1.763	1.77	29	24	65.5	24.5
Dr_C03_B	DR	C	2	18	10.17	15510	0.0655706	754.7	110.9	0.147	119184	1.763	1.77	29	24	65.5	24.5
Dr_C03_B	DR	C	2	19	10.74	15510	0.0692456	752.2	110.3	0.1467	118801	1.763	1.77	29	24	65.5	24.5
Dr_C03_B	DR	C	2	20	11.31	15510	0.0729207	748.8	110.5	0.1476	118261	1.763	1.77	29	24	65.5	24.5
Dr_C03_B	DR	C	2	21	11.88	15510	0.0765957	744.3	110.6	0.1486	117551	1.763	1.77	29	24	65.5	24.5
Dr_C03_B	DR	C	2	22	12.45	15510	0.0802708	738.9	111.5	0.1509	116692	1.763	1.77	29	24	65.5	24.5
Dr_C03_B	DR	C	2	23	13.02	15510	0.0839458	734	113.2	0.1542	115920	1.763	1.77	29	24	65.5	24.5
Dr_C03_B	DR	C	2	24	13.59	15510	0.0876209	730	115.4	0.1581	115281	1.763	1.77	29	24	65.5	24.5
Dr_C03_B	DR	C	2	25	14.16	15510	0.0912959	725.5	118.2	0.1629	114583	1.763	1.77	29	24	65.5	24.5
Dr_C03_B	DR	C	2	26	14.72	15510	0.0949065	723.5	120	0.1658	114265	1.763	1.77	29	24	65.5	24.5
Dr_C03_B	DR	C	2	27	15.29	15510	0.0985816	721.6	121	0.1677	113962	1.763	1.77	29	24	65.5	24.5
Dr_C03_B	DR	C	2	28	15.86	15510	0.102257	719.7	121.6	0.1689	113658	1.763	1.77	29	24	65.5	24.5
Dr_C03_B	DR	C	2	29	16.43	15510	0.105932	717.1	121.9	0.1699	113254	1.763	1.77	29	24	65.5	24.5
Dr_C03_B	DR	C	2	30	16.99	15510	0.109542	714.4	122.2	0.171	112830	1.763	1.77	29	24	65.5	24.5
Dr_C04_A	DR	C	3	1	0.5	14490	0.00345066	1237	124.8	0.1009	229045	1.798	1.9	33	28	84	28
Dr_C04_A	DR	C	3	2	1.068	14490	0.0073706	1222	140.7	0.1152	226113	1.798	1.9	33	28	84	28
Dr_C04_A	DR	C	3	3	1.637	14490	0.0112974	1211	143.9	0.1188	224257	1.798	1.9	33	28	84	28
Dr_C04_A	DR	C	3	4	2.199	14490	0.015176	1174	142.6	0.1215	217270	1.798	1.9	33	28	84	28
Dr_C04_A	DR	C	3	5	2.774	14490	0.0191442	1172	135.5	0.1156	216938	1.798	1.9	33	28	84	28
Dr_C04_A	DR	C	3	6	3.348	14490	0.0231056	1164	146.2	0.1256	215444	1.798	1.9	33	28	84	28
Dr_C04_A	DR	C	3	7	3.912	14490	0.0269979	1138	146.2	0.1285	210634	1.798	1.9	33	28	84	28
Dr_C04_A	DR	C	3	8	4.487	14490	0.0309662	1132	152.4	0.1346	209471	1.798	1.9	33	28	84	28
Dr_C04_A	DR	C	3	9	5.052	14490	0.0348654	1108	150.7	0.136	205111	1.798	1.9	33	28	84	28
Dr_C04_A	DR	C	3	10	5.622	14490	0.0387992	1100	161.2	0.1465	203703	1.798	1.9	33	28	84	28
Dr_C04_A	DR	C	3	11	6.192	14490	0.0427329	1084	154.8	0.1429	200565	1.798	1.9	33	28	84	28
Dr_C04_A	DR	C	3	12	6.761	14490	0.0466598	1066	163.5	0.1534	197278	1.798	1.9	33	28	84	28
Dr_C04_A	DR	C	3	13	7.331	14490	0.0505935	1060	166.4	0.1569	196226	1.798	1.9	33	28	84	28
Dr_C04_A	DR	C	3	14	7.901	14490	0.0545273	1047	163.7	0.1563	193896	1.798	1.9	33	28	84	28
Dr_C04_A	DR	C	3	15	8.471	14490	0.058461	1031	163.5	0.1587	190771	1.798	1.9	33	28	84	28
Dr_C04_A	DR	C	3	16	9.037	14490	0.0623672	1016	170.5	0.1677	188124	1.798	1.9	33	28	84	28
Dr_C04_A	DR	C	3	17	9.625	14490	0.0664251	1007	173.5	0.1723	186487	1.798	1.9	33	28	84	28
Dr_C04_A	DR	C	3	18	10.18	14490	0.0702553	998.6	173.6	0.1739	184840	1.798	1.9	33	28	84	28
Dr_C04_A	DR	C	3	19	10.75	14490	0.0741891	988.7	173.2	0.1751	183020	1.798	1.9	33	28	84	28
Dr_C04_A	DR	C	3	20	11.31	14490	0.0780538	977.6	172.3	0.1763	180964	1.798	1.9	33	28	84	28
Dr_C04_A	DR	C	3	21	11.88	14490	0.0819876	966.5	171.8	0.1778	178904	1.798	1.9	33	28	84	28
Dr_C04_A	DR	C	3	22	12.45	14490	0.0859213	955.5	176.3	0.1845	176878	1.798	1.9	33	28	84	28
Dr_C04_A	DR	C	3	23	13.03	14490	0.0899241	944.9	173.9	0.1841	174901	1.798	1.9	33	28	84	28
Dr_C04_A	DR	C	3	24	13.59	14490	0.0937888	936.8	176.1	0.188	173404	1.798	1.9	33	28	84	28
Dr_C04_A	DR	C	3	25	14.17	14490	0.0977916	929.1	177.8	0.1914	171992	1.798	1.9	33	28	84	28
Dr_C04_A	DR	C	3	26	14.74	14490	0.101725	922.3	178.6	0.1937	170729	1.798	1.9	33	28	84	28
Dr_C04_A	DR	C	3	27	15.31	14490	0.105659	915.7	178.7	0.1951	169503	1.798	1.9	33	28	84	28
Dr_C04_A	DR	C	3	28	15.87	14490	0.109524	909.9	178.4	0.1961	168435	1.798	1.9	33	28	84	28
Dr_C04_A	DR	C	3	29	16.43	14490	0.113389	903.1	177.4	0.1964	167178	1.798	1.9	33	28	84	28
Dr_C04_A	DR	C	3	30	17.01	14490	0.117391	895.8	176.7	0.1973	165813	1.798	1.9	33	28	84	28
Dr_C04_B	DR	C	3	1	0.5	13470	0.00371195	944.6	94.84	0.1004	173519	1.763	1.788	29	24	67	24
Dr_C04_B	DR	C	3	2	1.07	13470	0.00794358	904.6	101.4	0.1121	166180	1.763	1.788	29	24	67	24
Dr_C04_B	DR	C	3	3	1.638	13470	0.0121604	885.7	105	0.1185	162714	1.763	1.788	29	24	67	24
Dr_C04_B	DR	C	3	4	2.205	13470	0.0163697	883.6	111.8	0.1265	162322	1.763	1.788	29	24	67	24
Dr_C04_B	DR	C	3	5	2.773	13470	0.0205865	861.9	101.2	0.1174	158330	1.763	1.788	29	24	67	24
Dr_C04_B	DR	C	3	6	3.346	13470	0.0248404	861.2	103.7	0.1204	158203	1.763	1.788	29	24	67	24
Dr_C04_B	DR	C	3	7	3.912	13470	0.0290423	843.1	112.5	0.1335	154881	1.763	1.788	29	24	67	24
Dr_C04_B	DR	C	3	8	4.482	13470	0.0332739	837.9	107.1	0.1279	153930	1.763	1.788	29	24	67	24
Dr_C04_B	DR	C	3	9	5.049	13470	0.0374833	825.2	115.7	0.1401	151598	1.763	1.788	29	24	67	24
Dr_C04_B	DR	C	3	10	5.625	13470	0.0417595	821.2	112.8	0.1373	150852	1.763	1.788	29	24	67	24
Dr_C04_B	DR	C	3	11	6.193	13470	0.0459762	803.3	116.2	0.1446	147566	1.763	1.788	29	24	67	24
Dr_C04_B	DR	C	3	12	6.759	13470	0.0501782	801.3	120.3	0.1501	147209	1.763	1.788	29	24	67	24
Dr_C04_B	DR	C	3	13	7.332	13470	0.0544321	795.3	118.8	0.1493	146097	1.763	1.788	29	24	67	24
Dr_C04_B	DR	C	3	14	7.899	13470	0.0586414	784.5	117.7	0.1501	144121	1.763	1.788	29	24	67	24
Dr_C04_B	DR	C	3	15	8.465	13470	0.0628434	773.9	122.9	0.1588	142161	1.763	1.788	29	24	67	24
Dr_C04_B	DR	C	3	16	9.036	13470	0.0670824	769.8	125.9	0.1635	141419	1.763	1.788	29	24	67	24
Dr_C04_B	DR	C	3	17	9.604	13470	0.0712992	764.4	126.5	0.1655	140425	1.763	1.788	29	24	67	24
Dr_C04_B	DR	C	3	18	10.18	13470	0.0755754	758.4	126.5	0.1668	139319	1.763	1.788	29	24	67	24
Dr_C04_B	DR	C	3	19	10.74	13470	0.0797327	751.7	126.2	0.1679	138097	1.763	1.788	29	24	67	24
Dr_C04_B	DR	C	3	20	11.31	13470	0.0839644	743.7	126.3	0.1699	136622	1.763	1.788	29	24	67	24
Dr_C04_B	DR	C	3	21	11.88	13470	0.088196	736.8	127.8	0.1735	135344	1.763	1.788	29	24	67	24
Dr_C04_B	DR	C	3	22	12.46	13470	0.0925019	729.7	129.6	0.1776	134046	1.763	1.788	29	24	67	24
Dr_C04_B	DR	C	3	23	13.02	13470	0.0966592	724.8	131.9	0.182	133146	1.763	1.788	29	24	67	24
Dr_C04_B	DR	C	3	24	13.59	13470	0.100891	720.6	133.5	0.1853	132379	1.763	1.788	29	24	67	24
Dr_C04_B	DR	C	3	25	14.16	13470	0.105122	716.8	134.1	0.1871	131680	1.763	1.788	29	24	67	24
Dr_C04_B	DR	C	3	26	14.73	13470	0.109354	712.7	134.9	0.1893	130925	1.763	1.788	29	24	67	24
Dr_C04_B	DR	C	3	27	15.29	13470	0.113512	708.5	134.5	0.1898	130157	1.763	1.788	29	24	67	24
Dr_C04_B	DR	C	3	28	15.86	13470	0.117743	703.5	134	0.1905	129230	1.763	1.788	29	24	67	24
Dr_C04_B	DR	C	3	29	16.43	13470	0.121975	698.6	134.4	0.1923	128332	1.763	1.788	29	24	67	24
Dr_C04_B	DR	C	3	30	17	13470	0.126206	693.8	134.9	0.1945	127451	1.763	1.788	29	24	67	24
Dr_C05_A	DR	C	4	1	0.5	14910	0.00335345	1029	107.6	0.1046	230855	2.043	2.085	31	26	81	26
Dr_C05_A	DR	C	4	2	1.069	14910	0.00716969	1032	116.5	0.1129	231576	2.043	2.085	31	26	81	26
Dr_C05_A	DR	C	4	3	1.64	14910	0.0109993	1018	118.8	0.1167	228461	2.043	2.085	31	26	81	26
Dr_C05_A	DR	C	4	4	2.206	14910	0.0147954	984.2	126.1	0.1281	220863	2.043	2.085	31	26	81	26
Dr_C05_A	DR	C	4	5	2.773	14910	0.0185983	969.8	118.4	0.1221	217619	2.043	2.085	31	26	81	26
Dr_C05_A	DR	C	4	6	3.347	14910	0.022448	964.4	120.7	0.1252	216410	2.043	2.085	31	26	81	26
Dr_C05_A	DR	C	4	7	3.912	14910	0.0262374	945.5	131.4	0.1389	212179	2.043	2.085	31	26	81	26
Dr_C05_A	DR	C	4	8	4.481	14910	0.0300537	934.3	120.2	0.1287	209660	2.043	2.085	31	26	81	26
Dr_C05_A	DR	C	4	9	5.052	14910	0.0338833	917.5	133.6	0.1456	205902	2.043	2.085	31	26	81	26
Dr_C05_A	DR	C	4	10	5.622	14910	0.0377062	914.7	133.3	0.1457	205259	2.043	2.085	31	26	81	26
Dr_C05_A	DR	C	4	11	6.191	14910	0.0415225	898.4	129.3	0.1439	201615	2.043	2.085	31	26	81	26
Dr_C05_A	DR	C	4	12	6.762	14910	0.0453521	886.1	138.5	0.1563	198847	2.043	2.085	31	26	81	26
Dr_C05_A	DR	C	4	13	7.331	14910	0.0491683	881.2	138	0.1566	197743	2.043	2.085	31	26	81	26
Dr_C05_A	DR	C	4	14	7.9	14910	0.0529846	870.5	135.4	0.1555	195335	2.043	2.085	31	26	81	26
Dr_C05_A	DR	C	4	15	8.468	14910	0.0567941	856.8	134	0.1564	192276	2.043	2.085	31	26	81	26
Dr_C05_A	DR	C	4	16	9.036	14910	0.0606036	846.4	141	0.1666	189928	2.043	2.085	31	26	81	26
Dr_C05_A	DR	C	4	17	9.611	14910	0.0644601	840.9	141.7	0.1686	188696	2.043	2.085	31	26	81	26
Dr_C05_A	DR	C	4	18	10.18	14910	0.0682763	833.7	142.3	0.1707	187077	2.043	2.085	31	26	81	26
Dr_C05_A	DR	C	4	19	10.74	14910	0.0720322	826.6	141.8	0.1715	185501	2.043	2.085	31	26	81	26
Dr_C05_A	DR	C	4	20	11.31	14910	0.0758551	818.6	141	0.1722	183698	2.043	2.085	31	26	81	26
Dr_C05_A	DR	C	4	21	11.88	14910	0.0796781	809.6	140.4	0.1734	181679	2.043	2.085	31	26	81	26
Dr_C05_A	DR	C	4	22	12.46	14910	0.0835681	800.8	141.3	0.1765	179708	2.043	2.085	31	26	81	26
Dr_C05_A	DR	C	4	23	13.03	14910	0.087391	793.6	142.8	0.1799	178095	2.043	2.085	31	26	81	26
Dr_C05_A	DR	C	4	24	13.6	14910	0.091214	786.9	144.3	0.1834	176576	2.043	2.085	31	26	81	26
Dr_C05_A	DR	C	4	25	14.17	14910	0.0950369	780.9	145.7	0.1866	175245	2.043	2.085	31	26	81	26
Dr_C05_A	DR	C	4	26	14.73	14910	0.0987928	775.6	146.6	0.189	174041	2.043	2.085	31	26	81	26
Dr_C05_A	DR	C	4	27	15.3	14910	0.102616	770.8	146.3	0.1898	172965	2.043	2.085	31	26	81	26
Dr_C05_A	DR	C	4	28	15.86	14910	0.106372	765.6	145.8	0.1904	171815	2.043	2.085	31	26	81	26
Dr_C05_A	DR	C	4	29	16.43	14910	0.110195	760.3	145.1	0.1909	170605	2.043	2.085	31	26	81	26
Dr_C05_A	DR	C	4	30	17	14910	0.114017	754.1	144.6	0.1917	169223	2.043	2.085	31	26	81	26
Dr_C05_B	DR	C	4	1	0.5001	14580	0.00343004	1123	122.4	0.109	185022	1.755	1.743	27	22	65.5	22
Dr_C05_B	DR	C	4	2	1.068	14580	0.0073251	1085	135.4	0.1248	178779	1.755	1.743	27	22	65.5	22
Dr_C05_B	DR	C	4	3	1.637	14580	0.0112277	1062	144	0.1356	174996	1.755	1.743	27	22	65.5	22
Dr_C05_B	DR	C	4	4	2.204	14580	0.0151166	1031	137.9	0.1338	169829	1.755	1.743	27	22	65.5	22
Dr_C05_B	DR	C	4	5	2.775	14580	0.0190329	1020	134.9	0.1323	168058	1.755	1.743	27	22	65.5	22
Dr_C05_B	DR	C	4	6	3.343	14580	0.0229287	1008	151.6	0.1504	166058	1.755	1.743	27	22	65.5	22
Dr_C05_B	DR	C	4	7	3.911	14580	0.0268244	987.4	141.3	0.1431	162705	1.755	1.743	27	22	65.5	22
Dr_C05_B	DR	C	4	8	4.484	14580	0.0307545	983.1	148.6	0.1512	161998	1.755	1.743	27	22	65.5	22
Dr_C05_B	DR	C	4	9	5.049	14580	0.0346296	963.9	143.8	0.1491	158841	1.755	1.743	27	22	65.5	22
Dr_C05_B	DR	C	4	10	5.622	14580	0.0385597	954.8	152.6	0.1599	157327	1.755	1.743	27	22	65.5	22
Dr_C05_B	DR	C	4	11	6.192	14580	0.0424691	943.3	146.1	0.1549	155435	1.755	1.743	27	22	65.5	22
Dr_C05_B	DR	C	4	12	6.759	14580	0.046358	927.4	150.9	0.1628	152815	1.755	1.743	27	22	65.5	22
Dr_C05_B	DR	C	4	13	7.329	14580	0.0502675	922.7	155.1	0.1681	152038	1.755	1.743	27	22	65.5	22
Dr_C05_B	DR	C	4	14	7.898	14580	0.0541701	915.5	153.2	0.1674	150854	1.755	1.743	27	22	65.5	22
Dr_C05_B	DR	C	4	15	8.468	14580	0.0580796	902.4	150.7	0.167	148696	1.755	1.743	27	22	65.5	22
Dr_C05_B	DR	C	4	16	9.033	14580	0.0619547	891.9	158.6	0.1778	146968	1.755	1.743	27	22	65.5	22
Dr_C05_B	DR	C	4	17	9.609	14580	0.0659054	883.9	159.7	0.1807	145648	1.755	1.743	27	22	65.5	22
Dr_C05_B	DR	C	4	18	10.17	14580	0.0697531	877	160.4	0.1829	144522	1.755	1.743	27	22	65.5	22
Dr_C05_B	DR	C	4	19	10.74	14580	0.0736626	870.3	160.3	0.1842	143418	1.755	1.743	27	22	65.5	22
Dr_C05_B	DR	C	4	20	11.31	14580	0.077572	863.2	160	0.1854	142233	1.755	1.743	27	22	65.5	22
Dr_C05_B	DR	C	4	21	11.88	14580	0.0814815	855.4	159.8	0.1868	140951	1.755	1.743	27	22	65.5	22
Dr_C05_B	DR	C	4	22	12.45	14580	0.0853909	847.1	160.4	0.1894	139591	1.755	1.743	27	22	65.5	22
Dr_C05_B	DR	C	4	23	13.02	14580	0.0893004	839.3	161.6	0.1926	138298	1.755	1.743	27	22	65.5	22
Dr_C05_B	DR	C	4	24	13.59	14580	0.0932099	832.9	163.7	0.1966	137247	1.755	1.743	27	22	65.5	22
Dr_C05_B	DR	C	4	25	14.16	14580	0.0971193	827.4	166.3	0.2009	136339	1.755	1.743	27	22	65.5	22
Dr_C05_B	DR	C	4	26	14.73	14580	0.101029	823	168.1	0.2042	135624	1.755	1.743	27	22	65.5	22
Dr_C05_B	DR	C	4	27	15.29	14580	0.10487	819.5	168.7	0.2059	135039	1.755	1.743	27	22	65.5	22
Dr_C05_B	DR	C	4	28	15.86	14580	0.108779	814.9	169.3	0.2078	134283	1.755	1.743	27	22	65.5	22
Dr_C05_B	DR	C	4	29	16.43	14580	0.112689	810.6	169.1	0.2086	133579	1.755	1.743	27	22	65.5	22
Dr_C05_B	DR	C	4	30	17	14580	0.116598	805.6	168.8	0.2096	132756	1.755	1.743	27	22	65.5	22
Dr_C06_A	DR	C	5	1	0.5	14950	0.00334448	1312	124.7	0.09507	216215	1.795	1.748	31	26	90.5	26.5
Dr_C06_A	DR	C	5	2	1.07	14950	0.00715719	1309	133.7	0.1022	215657	1.795	1.748	31	26	90.5	26.5
Dr_C06_A	DR	C	5	3	1.641	14950	0.0109766	1299	136.8	0.1053	213979	1.795	1.748	31	26	90.5	26.5
Dr_C06_A	DR	C	5	4	2.206	14950	0.0147559	1266	150	0.1185	208679	1.795	1.748	31	26	90.5	26.5
Dr_C06_A	DR	C	5	5	2.774	14950	0.0185552	1247	140.5	0.1127	205393	1.795	1.748	31	26	90.5	26.5
Dr_C06_A	DR	C	5	6	3.347	14950	0.022388	1238	140.4	0.1134	203968	1.795	1.748	31	26	90.5	26.5
Dr_C06_A	DR	C	5	7	3.915	14950	0.0261873	1215	157.2	0.1293	200214	1.795	1.748	31	26	90.5	26.5
Dr_C06_A	DR	C	5	8	4.482	14950	0.0299799	1204	147.5	0.1225	198338	1.795	1.748	31	26	90.5	26.5
Dr_C06_A	DR	C	5	9	5.051	14950	0.033786	1184	159.9	0.135	195170	1.795	1.748	31	26	90.5	26.5
Dr_C06_A	DR	C	5	10	5.623	14950	0.037612	1180	159.2	0.1349	194473	1.795	1.748	31	26	90.5	26.5
Dr_C06_A	DR	C	5	11	6.19	14950	0.0414047	1161	155.5	0.1339	191349	1.795	1.748	31	26	90.5	26.5
Dr_C06_A	DR	C	5	12	6.761	14950	0.0452241	1147	167.4	0.146	188944	1.795	1.748	31	26	90.5	26.5
Dr_C06_A	DR	C	5	13	7.33	14950	0.0490301	1140	167.4	0.1468	187905	1.795	1.748	31	26	90.5	26.5
Dr_C06_A	DR	C	5	14	7.894	14950	0.0528027	1129	164.9	0.146	186096	1.795	1.748	31	26	90.5	26.5
Dr_C06_A	DR	C	5	15	8.467	14950	0.0566355	1110	166	0.1495	182928	1.795	1.748	31	26	90.5	26.5
Dr_C06_A	DR	C	5	16	9.034	14950	0.0604281	1098	174.4	0.1588	180937	1.795	1.748	31	26	90.5	26.5
Dr_C06_A	DR	C	5	17	9.611	14950	0.0642876	1091	175.8	0.1611	179843	1.795	1.748	31	26	90.5	26.5
Dr_C06_A	DR	C	5	18	10.17	14950	0.0680268	1083	177.1	0.1635	178440	1.795	1.748	31	26	90.5	26.5
Dr_C06_A	DR	C	5	19	10.74	14950	0.0718395	1074	176.9	0.1647	177016	1.795	1.748	31	26	90.5	26.5
Dr_C06_A	DR	C	5	20	11.31	14950	0.0756522	1064	176.7	0.166	175323	1.795	1.748	31	26	90.5	26.5
Dr_C06_A	DR	C	5	21	11.88	14950	0.0794649	1051	180.4	0.1716	173228	1.795	1.748	31	26	90.5	26.5
Dr_C06_A	DR	C	5	22	12.46	14950	0.0833445	1040	177.7	0.1709	171296	1.795	1.748	31	26	90.5	26.5
Dr_C06_A	DR	C	5	23	13.02	14950	0.0870903	1031	180.9	0.1755	169853	1.795	1.748	31	26	90.5	26.5
Dr_C06_A	DR	C	5	24	13.59	14950	0.090903	1023	183.8	0.1797	168536	1.795	1.748	31	26	90.5	26.5
Dr_C06_A	DR	C	5	25	14.17	14950	0.0947826	1016	185.9	0.183	167382	1.795	1.748	31	26	90.5	26.5
Dr_C06_A	DR	C	5	26	14.73	14950	0.0985284	1010	186.8	0.1849	166427	1.795	1.748	31	26	90.5	26.5
Dr_C06_A	DR	C	5	27	15.3	14950	0.102341	1004	187.1	0.1863	165401	1.795	1.748	31	26	90.5	26.5
Dr_C06_A	DR	C	5	28	15.86	14950	0.106087	998.4	187	0.1873	164512	1.795	1.748	31	26	90.5	26.5
Dr_C06_A	DR	C	5	29	16.43	14950	0.1099	991.4	186.2	0.1878	163350	1.795	1.748	31	26	90.5	26.5
Dr_C06_A	DR	C	5	30	17	14950	0.113712	984.2	186.3	0.1893	162167	1.795	1.748	31	26	90.5	26.5
Dr_C06_B	DR	C	5	1	0.5	14170	0.00352858	1088	111	0.102	183821	1.75	1.743	29	24	73.5	24
Dr_C06_B	DR	C	5	2	1.07	14170	0.00755116	1090	118.5	0.1087	184216	1.75	1.743	29	24	73.5	24
Dr_C06_B	DR	C	5	3	1.638	14170	0.0115596	1067	131.9	0.1236	180246	1.75	1.743	29	24	73.5	24
Dr_C06_B	DR	C	5	4	2.207	14170	0.0155752	1043	138.5	0.1328	176181	1.75	1.743	29	24	73.5	24
Dr_C06_B	DR	C	5	5	2.773	14170	0.0195695	1031	122	0.1183	174227	1.75	1.743	29	24	73.5	24
Dr_C06_B	DR	C	5	6	3.349	14170	0.0236344	1023	129.2	0.1263	172849	1.75	1.743	29	24	73.5	24
Dr_C06_B	DR	C	5	7	3.912	14170	0.0276076	999.1	131.5	0.1317	168822	1.75	1.743	29	24	73.5	24
Dr_C06_B	DR	C	5	8	4.487	14170	0.0316655	994.3	134.7	0.1355	168013	1.75	1.743	29	24	73.5	24
Dr_C06_B	DR	C	5	9	5.051	14170	0.0356457	973.9	135.9	0.1396	164552	1.75	1.743	29	24	73.5	24
Dr_C06_B	DR	C	5	10	5.623	14170	0.0396824	967.1	142.3	0.1472	163414	1.75	1.743	29	24	73.5	24
Dr_C06_B	DR	C	5	11	6.19	14170	0.0436838	952.3	137.6	0.1445	160911	1.75	1.743	29	24	73.5	24
Dr_C06_B	DR	C	5	12	6.788	14170	0.047904	935.8	146.4	0.1565	158127	1.75	1.743	29	24	73.5	24
Dr_C06_B	DR	C	5	13	7.331	14170	0.0517361	932.1	146.5	0.1571	157495	1.75	1.743	29	24	73.5	24
Dr_C06_B	DR	C	5	14	7.899	14170	0.0557445	921.9	144.1	0.1563	155781	1.75	1.743	29	24	73.5	24
Dr_C06_B	DR	C	5	15	8.469	14170	0.0597671	907	144.5	0.1594	153249	1.75	1.743	29	24	73.5	24
Dr_C06_B	DR	C	5	16	9.037	14170	0.0637756	896.3	151.1	0.1686	151450	1.75	1.743	29	24	73.5	24
Dr_C06_B	DR	C	5	17	9.608	14170	0.0678052	890.8	152	0.1707	150522	1.75	1.743	29	24	73.5	24
Dr_C06_B	DR	C	5	18	10.18	14170	0.0718419	883	152.9	0.1731	149205	1.75	1.743	29	24	73.5	24
Dr_C06_B	DR	C	5	19	10.74	14170	0.0757939	875.5	152.4	0.1741	147938	1.75	1.743	29	24	73.5	24
Dr_C06_B	DR	C	5	20	11.31	14170	0.0798165	867.5	152.2	0.1754	146583	1.75	1.743	29	24	73.5	24
Dr_C06_B	DR	C	5	21	11.88	14170	0.0838391	857.9	151.8	0.1769	144960	1.75	1.743	29	24	73.5	24
Dr_C06_B	DR	C	5	22	12.45	14170	0.0878617	849.5	153	0.1801	143543	1.75	1.743	29	24	73.5	24
Dr_C06_B	DR	C	5	23	13.02	14170	0.0918843	842.2	154.5	0.1835	142298	1.75	1.743	29	24	73.5	24
Dr_C06_B	DR	C	5	24	13.59	14170	0.0959068	836	156.4	0.1871	141255	1.75	1.743	29	24	73.5	24
Dr_C06_B	DR	C	5	25	14.16	14170	0.0999294	830.8	157.9	0.19	140376	1.75	1.743	29	24	73.5	24
Dr_C06_B	DR	C	5	26	14.73	14170	0.103952	826.3	158.5	0.1918	139615	1.75	1.743	29	24	73.5	24
Dr_C06_B	DR	C	5	27	15.3	14170	0.107975	822.1	158.9	0.1933	138914	1.75	1.743	29	24	73.5	24
Dr_C06_B	DR	C	5	28	15.86	14170	0.111927	817.3	158.1	0.1934	138101	1.75	1.743	29	24	73.5	24
Dr_C06_B	DR	C	5	29	16.43	14170	0.115949	812	157.2	0.1936	137209	1.75	1.743	29	24	73.5	24
Dr_C06_B	DR	C	5	30	17	14170	0.119972	806.5	157.1	0.1948	136266	1.75	1.743	29	24	73.5	24
Dr_C07_A	DR	C	5	1	0.4999	13760	0.00363299	1030	104.7	0.1017	319105	2.358	2.3	29	24	87	24.5
Dr_C07_A	DR	C	6	2	1.264	13760	0.00918605	1025	123.5	0.1205	317694	2.358	2.3	29	24	87	24.5
Dr_C07_A	DR	C	6	3	2.026	13760	0.0147238	995	118.6	0.1192	308320	2.358	2.3	29	24	87	24.5
Dr_C07_A	DR	C	6	4	2.791	13760	0.0202834	966.2	133.1	0.1377	299388	2.358	2.3	29	24	87	24.5
Dr_C07_A	DR	C	6	5	3.549	13760	0.0257922	940.4	132.3	0.1406	291401	2.358	2.3	29	24	87	24.5
Dr_C07_A	DR	C	6	6	4.315	13760	0.031359	922.8	127.1	0.1377	285956	2.358	2.3	29	24	87	24.5
Dr_C07_A	DR	C	6	7	5.081	13760	0.0369259	904.8	141.1	0.156	280365	2.358	2.3	29	24	87	24.5
Dr_C07_A	DR	C	6	8	5.843	13760	0.0424637	884.7	130.1	0.147	274158	2.358	2.3	29	24	87	24.5
Dr_C07_A	DR	C	6	9	6.615	13760	0.0480741	870.1	143.3	0.1647	269620	2.358	2.3	29	24	87	24.5
Dr_C07_A	DR	C	6	10	7.37	13760	0.053561	851.7	134.3	0.1576	263912	2.358	2.3	29	24	87	24.5
Dr_C07_A	DR	C	6	11	8.133	13760	0.0591061	834.7	144.7	0.1733	258662	2.358	2.3	29	24	87	24.5
Dr_C07_A	DR	C	6	12	8.895	13760	0.0646439	826.7	144.7	0.175	256187	2.358	2.3	29	24	87	24.5
Dr_C07_A	DR	C	6	13	9.667	13760	0.0702544	812.8	142.2	0.175	251850	2.358	2.3	29	24	87	24.5
Dr_C07_A	DR	C	6	14	10.42	13760	0.0757267	790.9	146	0.1846	245068	2.358	2.3	29	24	87	24.5
Dr_C07_A	DR	C	6	15	11.19	13760	0.0813227	782	149.8	0.1916	242319	2.358	2.3	29	24	87	24.5
Dr_C07_A	DR	C	6	16	11.96	13760	0.0869186	768.7	145.8	0.1897	238208	2.358	2.3	29	24	87	24.5
Dr_C07_A	DR	C	6	17	12.73	13760	0.0925145	753	147.6	0.196	233340	2.358	2.3	29	24	87	24.5
Dr_C07_A	DR	C	6	18	13.51	13760	0.0981831	738.5	149.7	0.2026	228852	2.358	2.3	29	24	87	24.5
Dr_C07_A	DR	C	6	19	14.28	13760	0.103779	725	152.4	0.2102	224652	2.358	2.3	29	24	87	24.5
Dr_C07_A	DR	C	6	20	15.04	13760	0.109302	712.6	155.2	0.2178	220824	2.358	2.3	29	24	87	24.5
Dr_C07_B	DR	C	6	1	0.5002	14500	0.00344965	1082	107.7	0.09948	295456	2.243	2.248	28	23	80	23.5
Dr_C07_B	DR	C	6	2	0.5398	14500	0.00372276	1081	108.5	0.1004	295082	2.243	2.248	28	23	80	23.5
Dr_C07_B	DR	C	6	3	0.5829	14500	0.00402	1088	110.1	0.1012	296941	2.243	2.248	28	23	80	23.5
Dr_C07_B	DR	C	6	4	0.6292	14500	0.00433931	1091	105.4	0.09663	297771	2.243	2.248	28	23	80	23.5
Dr_C07_B	DR	C	6	5	0.6792	14500	0.00468414	1088	109.2	0.1003	297136	2.243	2.248	28	23	80	23.5
Dr_C07_B	DR	C	6	6	0.7337	14500	0.00506	1094	112.6	0.1029	298726	2.243	2.248	28	23	80	23.5
Dr_C07_B	DR	C	6	7	0.7926	14500	0.00546621	1094	108.8	0.09946	298753	2.243	2.248	28	23	80	23.5
Dr_C07_B	DR	C	6	8	0.8556	14500	0.00590069	1087	105.4	0.09691	296789	2.243	2.248	28	23	80	23.5
Dr_C07_B	DR	C	6	9	0.9236	14500	0.00636966	1080	110.3	0.1021	294850	2.243	2.248	28	23	80	23.5
Dr_C07_B	DR	C	6	10	0.9978	14500	0.00688138	1082	112.4	0.1039	295331	2.243	2.248	28	23	80	23.5
Dr_C07_B	DR	C	6	11	1.078	14500	0.00743448	1079	108	0.1001	294431	2.243	2.248	28	23	80	23.5
Dr_C07_B	DR	C	6	12	1.163	14500	0.00802069	1069	105.4	0.09854	291947	2.243	2.248	28	23	80	23.5
Dr_C07_B	DR	C	6	13	1.256	14500	0.00866207	1064	111.8	0.1051	290435	2.243	2.248	28	23	80	23.5
Dr_C07_B	DR	C	6	14	1.357	14500	0.00935862	1067	112.3	0.1053	291321	2.243	2.248	28	23	80	23.5
Dr_C07_B	DR	C	6	15	1.466	14500	0.0101103	1063	108.1	0.1018	290079	2.243	2.248	28	23	80	23.5
Dr_C07_B	DR	C	6	16	1.581	14500	0.0109034	1049	109.5	0.1044	286320	2.243	2.248	28	23	80	23.5
Dr_C07_B	DR	C	6	17	1.707	14500	0.0117724	1043	117.8	0.113	284796	2.243	2.248	28	23	80	23.5
Dr_C07_B	DR	C	6	18	1.843	14500	0.0127103	1048	111.3	0.1061	286202	2.243	2.248	28	23	80	23.5
Dr_C07_B	DR	C	6	19	1.99	14500	0.0137241	1043	110.6	0.106	284798	2.243	2.248	28	23	80	23.5
Dr_C07_B	DR	C	6	20	2.15	14500	0.0148276	1040	116.9	0.1124	284002	2.243	2.248	28	23	80	23.5
Dr_C07_B	DR	C	6	21	2.321	14500	0.0160069	1041	114.9	0.1104	284069	2.243	2.248	28	23	80	23.5
Dr_C07_B	DR	C	6	22	2.506	14500	0.0172828	1033	112.4	0.1088	282063	2.243	2.248	28	23	80	23.5
Dr_C07_B	DR	C	6	23	2.707	14500	0.018669	1025	118.4	0.1156	279792	2.243	2.248	28	23	80	23.5
Dr_C07_B	DR	C	6	24	2.922	14500	0.0201517	1024	118.5	0.1157	279602	2.243	2.248	28	23	80	23.5
Dr_C07_B	DR	C	6	25	3.156	14500	0.0217655	1020	115.6	0.1133	278533	2.243	2.248	28	23	80	23.5
Dr_C07_B	DR	C	6	26	3.406	14500	0.0234897	1008	118.4	0.1174	275229	2.243	2.248	28	23	80	23.5
Dr_C07_B	DR	C	6	27	3.68	14500	0.0253793	1006	124.1	0.1233	274684	2.243	2.248	28	23	80	23.5
Dr_C07_B	DR	C	6	28	3.973	14500	0.0274	997.2	126	0.1263	272244	2.243	2.248	28	23	80	23.5
Dr_C07_B	DR	C	6	29	4.29	14500	0.0295862	991.7	120.4	0.1214	270721	2.243	2.248	28	23	80	23.5
Dr_C07_B	DR	C	6	30	4.631	14500	0.0319379	979.1	124.3	0.127	267293	2.243	2.248	28	23	80	23.5
Dr_C07_B	DR	C	6	31	5.001	14500	0.0344897	974.7	128.8	0.1322	266098	2.243	2.248	28	23	80	23.5
Dr_C07_B	DR	C	6	32	5.401	14500	0.0372483	969.5	127.4	0.1314	264673	2.243	2.248	28	23	80	23.5
Dr_C07_B	DR	C	6	33	5.836	14500	0.0402483	956.7	125	0.1307	261174	2.243	2.248	28	23	80	23.5
Dr_C07_B	DR	C	6	34	6.296	14500	0.0434207	942.3	130.4	0.1384	257248	2.243	2.248	28	23	80	23.5
Dr_C07_B	DR	C	6	35	6.801	14500	0.0469034	936.9	134.6	0.1436	255759	2.243	2.248	28	23	80	23.5
Dr_C07_B	DR	C	6	36	7.343	14500	0.0506414	928.8	132.4	0.1426	253571	2.243	2.248	28	23	80	23.5
Dr_C07_B	DR	C	6	37	7.928	14500	0.0546759	913.9	130.6	0.1429	249490	2.243	2.248	28	23	80	23.5
Dr_C07_B	DR	C	6	38	8.56	14500	0.0590345	899.6	137.4	0.1527	245598	2.243	2.248	28	23	80	23.5
Dr_C07_B	DR	C	6	39	9.246	14500	0.0637655	892.6	139.1	0.1558	243679	2.243	2.248	28	23	80	23.5
Dr_C07_B	DR	C	6	40	9.983	14500	0.0688483	881.2	137.3	0.1558	240561	2.243	2.248	28	23	80	23.5
Dr_C07_B	DR	C	6	41	10.78	14500	0.0743448	865.3	136.2	0.1574	236214	2.243	2.248	28	23	80	23.5
Dr_C07_B	DR	C	6	42	11.63	14500	0.0802069	850	142.8	0.168	232041	2.243	2.248	28	23	80	23.5
Dr_C07_B	DR	C	6	43	12.57	14500	0.0866897	842.1	145.2	0.1724	229876	2.243	2.248	28	23	80	23.5
Dr_C07_B	DR	C	6	44	13.57	14500	0.0935862	830.4	143.8	0.1732	226689	2.243	2.248	28	23	80	23.5
Dr_C07_B	DR	C	6	45	14.65	14500	0.101034	814.6	141.7	0.1739	222387	2.243	2.248	28	23	80	23.5
Dr_C07_B	DR	C	6	46	15	14500	0.103448	808.3	142.6	0.1764	220657	2.243	2.248	28	23	80	23.5
Dr_C08_A	DR	C	7	1	0.5	14860	0.00336474	1231	130.8	0.1063	225095	1.87	1.85	32	27	75.5	27
Dr_C08_A	DR	C	7	2	1.066	14860	0.00717362	1212	136.2	0.1124	221619	1.87	1.85	32	27	75.5	27
Dr_C08_A	DR	C	7	3	1.636	14860	0.0110094	1203	140.5	0.1167	220007	1.87	1.85	32	27	75.5	27
Dr_C08_A	DR	C	7	4	2.206	14860	0.0148452	1189	140.1	0.1178	217410	1.87	1.85	32	27	75.5	27
Dr_C08_A	DR	C	7	5	2.778	14860	0.0186945	1176	157	0.1335	215004	1.87	1.85	32	27	75.5	27
Dr_C08_A	DR	C	7	6	3.344	14860	0.0225034	1134	168.5	0.1486	207290	1.87	1.85	32	27	75.5	27
Dr_C08_A	DR	C	7	7	3.915	14860	0.0263459	1119	165.4	0.1478	204685	1.87	1.85	32	27	75.5	27
Dr_C08_A	DR	C	7	8	4.484	14860	0.030175	1091	177.4	0.1626	199502	1.87	1.85	32	27	75.5	27
Dr_C08_A	DR	C	7	9	5.054	14860	0.0340108	1076	169.7	0.1577	196706	1.87	1.85	32	27	75.5	27
Dr_C08_A	DR	C	7	10	5.62	14860	0.0378197	1055	179.8	0.1704	192970	1.87	1.85	32	27	75.5	27
Dr_C08_A	DR	C	7	11	6.193	14860	0.0416756	1046	178.5	0.1706	191308	1.87	1.85	32	27	75.5	27
Dr_C08_A	DR	C	7	12	6.762	14860	0.0455047	1026	173.9	0.1695	187645	1.87	1.85	32	27	75.5	27
Dr_C08_A	DR	C	7	13	7.329	14860	0.0493203	1009	181.1	0.1795	184427	1.87	1.85	32	27	75.5	27
Dr_C08_A	DR	C	7	14	7.9	14860	0.0531629	1001	183.8	0.1837	182992	1.87	1.85	32	27	75.5	27
Dr_C08_A	DR	C	7	15	8.471	14860	0.0570054	990.2	181.8	0.1836	181066	1.87	1.85	32	27	75.5	27
Dr_C08_A	DR	C	7	16	9.045	14860	0.0608681	976.1	179.2	0.1836	178475	1.87	1.85	32	27	75.5	27
Dr_C08_A	DR	C	7	17	9.607	14860	0.0646501	962.9	180.2	0.1871	176072	1.87	1.85	32	27	75.5	27
Dr_C08_A	DR	C	7	18	10.18	14860	0.0685061	951.4	182.1	0.1913	173970	1.87	1.85	32	27	75.5	27
Dr_C08_A	DR	C	7	19	10.75	14860	0.0723419	941.2	184.4	0.1959	172101	1.87	1.85	32	27	75.5	27
Dr_C08_A	DR	C	7	20	11.32	14860	0.0761777	930	187.4	0.2015	170052	1.87	1.85	32	27	75.5	27
Dr_C08_A	DR	C	7	21	11.88	14860	0.0799462	924.2	187.7	0.2031	168983	1.87	1.85	32	27	75.5	27
Dr_C08_A	DR	C	7	22	12.45	14860	0.083782	916.9	188.1	0.2051	167659	1.87	1.85	32	27	75.5	27
Dr_C08_A	DR	C	7	23	13.02	14860	0.0876178	909.9	187	0.2055	166369	1.87	1.85	32	27	75.5	27
Dr_C08_A	DR	C	7	24	13.59	14860	0.0914536	902	185.9	0.2061	164933	1.87	1.85	32	27	75.5	27
Dr_C08_A	DR	C	7	25	14.16	14860	0.0952894	894	185.7	0.2077	163473	1.87	1.85	32	27	75.5	27
Dr_C08_A	DR	C	7	26	14.73	14860	0.0991252	886	186.1	0.21	161998	1.87	1.85	32	27	75.5	27
Dr_C08_A	DR	C	7	27	15.3	14860	0.102961	878.8	187.2	0.213	160693	1.87	1.85	32	27	75.5	27
Dr_C08_A	DR	C	7	28	15.87	14860	0.106797	872	189	0.2167	159451	1.87	1.85	32	27	75.5	27
Dr_C08_A	DR	C	7	29	16.44	14860	0.110633	867.1	190.5	0.2197	158547	1.87	1.85	32	27	75.5	27
Dr_C08_A	DR	C	7	30	17	14860	0.114401	863.2	191.1	0.2214	157828	1.87	1.85	32	27	75.5	27
Dr_C08_B	DR	C	7	1	0.5	14980	0.00333778	1240	123.7	0.09984	255038	1.955	2.008	29	24	83.5	24
Dr_C08_B	DR	C	7	2	1.069	14980	0.00713618	1265	127.5	0.1008	260208	1.955	2.008	29	24	83.5	24
Dr_C08_B	DR	C	7	3	1.639	14980	0.0109413	1240	130.5	0.1053	255045	1.955	2.008	29	24	83.5	24
Dr_C08_B	DR	C	7	4	2.209	14980	0.0147463	1216	143.4	0.1179	250284	1.955	2.008	29	24	83.5	24
Dr_C08_B	DR	C	7	5	2.773	14980	0.0185113	1185	154.3	0.1302	243827	1.955	2.008	29	24	83.5	24
Dr_C08_B	DR	C	7	6	3.338	14980	0.022283	1158	149.1	0.1287	238237	1.955	2.008	29	24	83.5	24
Dr_C08_B	DR	C	7	7	3.918	14980	0.0261549	1155	154.6	0.1338	237726	1.955	2.008	29	24	83.5	24
Dr_C08_B	DR	C	7	8	4.481	14980	0.0299132	1126	156.2	0.1387	231759	1.955	2.008	29	24	83.5	24
Dr_C08_B	DR	C	7	9	5.056	14980	0.0337517	1119	165	0.1475	230214	1.955	2.008	29	24	83.5	24
Dr_C08_B	DR	C	7	10	5.642	14980	0.0376636	1096	158.9	0.1449	225602	1.955	2.008	29	24	83.5	24
Dr_C08_B	DR	C	7	11	6.19	14980	0.0413218	1077	168.3	0.1563	221561	1.955	2.008	29	24	83.5	24
Dr_C08_B	DR	C	7	12	6.762	14980	0.0451402	1069	170.8	0.1597	220048	1.955	2.008	29	24	83.5	24
Dr_C08_B	DR	C	7	13	7.334	14980	0.0489586	1054	166.5	0.158	216793	1.955	2.008	29	24	83.5	24
Dr_C08_B	DR	C	7	14	7.901	14980	0.0527437	1034	167	0.1615	212846	1.955	2.008	29	24	83.5	24
Dr_C08_B	DR	C	7	15	8.469	14980	0.0565354	1020	175	0.1716	209932	1.955	2.008	29	24	83.5	24
Dr_C08_B	DR	C	7	16	9.041	14980	0.0603538	1013	175.4	0.1732	208353	1.955	2.008	29	24	83.5	24
Dr_C08_B	DR	C	7	17	9.606	14980	0.0641255	1002	174.6	0.1743	206098	1.955	2.008	29	24	83.5	24
Dr_C08_B	DR	C	7	18	10.18	14980	0.0679573	989.8	173.6	0.1754	203657	1.955	2.008	29	24	83.5	24
Dr_C08_B	DR	C	7	19	10.74	14980	0.0716956	978	172.8	0.1767	201233	1.955	2.008	29	24	83.5	24
Dr_C08_B	DR	C	7	20	11.32	14980	0.0755674	965.3	174.4	0.1807	198607	1.955	2.008	29	24	83.5	24
Dr_C08_B	DR	C	7	21	11.89	14980	0.0793725	954.8	176.2	0.1846	196461	1.955	2.008	29	24	83.5	24
Dr_C08_B	DR	C	7	22	12.46	14980	0.0831776	945.3	178.2	0.1885	194508	1.955	2.008	29	24	83.5	24
Dr_C08_B	DR	C	7	23	13.03	14980	0.0869826	937.1	180	0.1921	192820	1.955	2.008	29	24	83.5	24
Dr_C08_B	DR	C	7	24	13.59	14980	0.090721	930	180.7	0.1943	191359	1.955	2.008	29	24	83.5	24
Dr_C08_B	DR	C	7	25	14.17	14980	0.0945928	923	180.8	0.1959	189918	1.955	2.008	29	24	83.5	24
Dr_C08_B	DR	C	7	26	14.73	14980	0.0983311	917	180.7	0.1971	188684	1.955	2.008	29	24	83.5	24
Dr_C08_B	DR	C	7	27	15.3	14980	0.102136	909.3	179.6	0.1976	187084	1.955	2.008	29	24	83.5	24
Dr_C08_B	DR	C	7	28	15.87	14980	0.105941	901.4	179.3	0.1989	185468	1.955	2.008	29	24	83.5	24
Dr_C08_B	DR	C	7	29	16.44	14980	0.109746	893.5	179.7	0.2012	183840	1.955	2.008	29	24	83.5	24
Dr_C08_B	DR	C	7	30	17.01	14980	0.113551	886.6	182.4	0.2057	182415	1.955	2.008	29	24	83.5	24
Dr_C12_A	DR	C	8	1	0.5	14810	0.0033761	1266	127.1	0.1004	297575	2.085	2.125	24	19	89.5	21
Dr_C12_A	DR	C	8	2	1.07	14810	0.00722485	1288	130.9	0.1016	302770	2.085	2.125	24	19	89.5	21
Dr_C12_A	DR	C	8	3	1.631	14810	0.0110128	1254	130.5	0.104	294747	2.085	2.125	24	19	89.5	21
Dr_C12_A	DR	C	8	4	2.209	14810	0.0149156	1235	143.8	0.1164	290171	2.085	2.125	24	19	89.5	21
Dr_C12_A	DR	C	8	5	2.775	14810	0.0187373	1207	159.5	0.1322	283638	2.085	2.125	24	19	89.5	21
Dr_C12_A	DR	C	8	6	3.345	14810	0.0225861	1189	147.3	0.1238	279451	2.085	2.125	24	19	89.5	21
Dr_C12_A	DR	C	8	7	3.915	14810	0.0264348	1173	165.3	0.141	275527	2.085	2.125	24	19	89.5	21
Dr_C12_A	DR	C	8	8	4.483	14810	0.0302701	1153	154.5	0.134	270970	2.085	2.125	24	19	89.5	21
Dr_C12_A	DR	C	8	9	5.054	14810	0.0341256	1137	168.3	0.148	267124	2.085	2.125	24	19	89.5	21
Dr_C12_A	DR	C	8	10	5.622	14810	0.0379608	1127	161.8	0.1436	264780	2.085	2.125	24	19	89.5	21
Dr_C12_A	DR	C	8	11	6.189	14810	0.0417893	1102	167.6	0.1521	259009	2.085	2.125	24	19	89.5	21
Dr_C12_A	DR	C	8	12	6.765	14810	0.0456786	1096	170.8	0.1559	257432	2.085	2.125	24	19	89.5	21
Dr_C12_A	DR	C	8	13	7.332	14810	0.0495071	1083	167.5	0.1546	254490	2.085	2.125	24	19	89.5	21
Dr_C12_A	DR	C	8	14	7.902	14810	0.0533558	1064	169.1	0.1589	250072	2.085	2.125	24	19	89.5	21
Dr_C12_A	DR	C	8	15	8.469	14810	0.0571843	1048	173.9	0.1659	246220	2.085	2.125	24	19	89.5	21
Dr_C12_A	DR	C	8	16	9.041	14810	0.0610466	1040	175.7	0.1689	244501	2.085	2.125	24	19	89.5	21
Dr_C12_A	DR	C	8	17	9.609	14810	0.0648818	1029	174.9	0.1699	241907	2.085	2.125	24	19	89.5	21
Dr_C12_A	DR	C	8	18	10.18	14810	0.0687373	1018	173.9	0.1708	239264	2.085	2.125	24	19	89.5	21
Dr_C12_A	DR	C	8	19	10.75	14810	0.0725861	1006	173	0.1721	236307	2.085	2.125	24	19	89.5	21
Dr_C12_A	DR	C	8	20	11.32	14810	0.0764348	992.8	173.8	0.175	233295	2.085	2.125	24	19	89.5	21
Dr_C12_A	DR	C	8	21	11.89	14810	0.0802836	980.7	174.7	0.1782	230461	2.085	2.125	24	19	89.5	21
Dr_C12_A	DR	C	8	22	12.46	14810	0.0841323	969.7	176.7	0.1822	227869	2.085	2.125	24	19	89.5	21
Dr_C12_A	DR	C	8	23	13.03	14810	0.0879811	960.6	178.6	0.1859	225733	2.085	2.125	24	19	89.5	21
Dr_C12_A	DR	C	8	24	13.6	14810	0.0918298	952.1	179.7	0.1887	223726	2.085	2.125	24	19	89.5	21
Dr_C12_A	DR	C	8	25	14.17	14810	0.0956786	944.2	180	0.1906	221878	2.085	2.125	24	19	89.5	21
Dr_C12_A	DR	C	8	26	14.73	14810	0.0994598	936.5	179.5	0.1917	220057	2.085	2.125	24	19	89.5	21
Dr_C12_A	DR	C	8	27	15.3	14810	0.103309	927.7	178.6	0.1926	217990	2.085	2.125	24	19	89.5	21
Dr_C12_A	DR	C	8	28	15.87	14810	0.107157	918.4	178	0.1938	215816	2.085	2.125	24	19	89.5	21
Dr_C12_A	DR	C	8	29	16.44	14810	0.111006	908.6	178.1	0.196	213497	2.085	2.125	24	19	89.5	21
Dr_C12_A	DR	C	8	30	17.02	14810	0.114922	900.3	179	0.1988	211547	2.085	2.125	24	19	89.5	21
Dr_C12_B	DR	C	8	1	0.5001	14220	0.00351688	768.6	87.7	0.1141	115707	1.635	1.668	26	21	52	21
Dr_C12_B	DR	C	8	2	1.067	14220	0.00750352	769.3	94.67	0.1231	115813	1.635	1.668	26	21	52	21
Dr_C12_B	DR	C	8	3	1.637	14220	0.011512	759.4	92.57	0.1219	114324	1.635	1.668	26	21	52	21
Dr_C12_B	DR	C	8	4	2.209	14220	0.0155345	752.5	94.85	0.126	113291	1.635	1.668	26	21	52	21
Dr_C12_B	DR	C	8	5	2.775	14220	0.0195148	737.3	105.6	0.1432	111003	1.635	1.668	26	21	52	21
Dr_C12_B	DR	C	8	6	3.344	14220	0.0235162	727.5	97.51	0.134	109519	1.635	1.668	26	21	52	21
Dr_C12_B	DR	C	8	7	3.914	14220	0.0275246	720.9	107.5	0.1492	108540	1.635	1.668	26	21	52	21
Dr_C12_B	DR	C	8	8	4.481	14220	0.031512	710.5	101.1	0.1422	106965	1.635	1.668	26	21	52	21
Dr_C12_B	DR	C	8	9	5.052	14220	0.0355274	703.8	109	0.1549	105958	1.635	1.668	26	21	52	21
Dr_C12_B	DR	C	8	10	5.62	14220	0.0395218	699.5	104.6	0.1496	105318	1.635	1.668	26	21	52	21
Dr_C12_B	DR	C	8	11	6.183	14220	0.043481	690.7	110.3	0.1596	103980	1.635	1.668	26	21	52	21
Dr_C12_B	DR	C	8	12	6.761	14220	0.0475457	687.6	111.2	0.1617	103522	1.635	1.668	26	21	52	21
Dr_C12_B	DR	C	8	13	7.329	14220	0.0515401	682	109.4	0.1604	102677	1.635	1.668	26	21	52	21
Dr_C12_B	DR	C	8	14	7.892	14220	0.0554993	671.5	111.1	0.1655	101099	1.635	1.668	26	21	52	21
Dr_C12_B	DR	C	8	15	8.466	14220	0.0595359	668.8	115.5	0.1727	100686	1.635	1.668	26	21	52	21
Dr_C12_B	DR	C	8	16	9.036	14220	0.0635443	665.9	114.8	0.1724	100256	1.635	1.668	26	21	52	21
Dr_C12_B	DR	C	8	17	9.601	14220	0.0675176	661.1	114.7	0.1734	99529	1.635	1.668	26	21	52	21
Dr_C12_B	DR	C	8	18	10.17	14220	0.071519	655.5	115	0.1754	98690	1.635	1.668	26	21	52	21
Dr_C12_B	DR	C	8	19	10.74	14220	0.0755274	650.3	116.3	0.1788	97907	1.635	1.668	26	21	52	21
Dr_C12_B	DR	C	8	20	11.31	14220	0.0795359	645.4	118.1	0.183	97165	1.635	1.668	26	21	52	21
Dr_C12_B	DR	C	8	21	11.88	14220	0.0835443	641.3	120.4	0.1877	96542	1.635	1.668	26	21	52	21
Dr_C12_B	DR	C	8	22	12.45	14220	0.0875527	638.5	122.5	0.1918	96134	1.635	1.668	26	21	52	21
Dr_C12_B	DR	C	8	23	13.02	14220	0.0915612	636.1	123.7	0.1944	95771	1.635	1.668	26	21	52	21
Dr_C12_B	DR	C	8	24	13.58	14220	0.0954993	633.8	124.4	0.1963	95423	1.635	1.668	26	21	52	21
Dr_C12_B	DR	C	8	25	14.15	14220	0.0995077	631	125	0.198	95005	1.635	1.668	26	21	52	21
Dr_C12_B	DR	C	8	26	14.72	14220	0.103516	627.8	125	0.1991	94514	1.635	1.668	26	21	52	21
Dr_C12_B	DR	C	8	27	15.29	14220	0.107525	624.4	125.4	0.2009	94002	1.635	1.668	26	21	52	21
Dr_C12_B	DR	C	8	28	15.86	14220	0.111533	621	126.3	0.2034	93488	1.635	1.668	26	21	52	21
Dr_C12_B	DR	C	8	29	16.43	14220	0.115541	618.5	127.6	0.2063	93119	1.635	1.668	26	21	52	21
Dr_C12_B	DR	C	8	30	17	14220	0.11955	616.4	129.2	0.2097	92796	1.635	1.668	26	21	52	21
Dr_C14_A	DR	C	9	1	0.5001	13760	0.00363445	1058	109.2	0.1031	203657	1.865	1.808	30	25	74	25
Dr_C14_A	DR	C	9	2	1.07	13760	0.00777616	1052	120.2	0.1142	202423	1.865	1.808	30	25	74	25
Dr_C14_A	DR	C	9	3	1.639	13760	0.0119113	1042	126.5	0.1215	200421	1.865	1.808	30	25	74	25
Dr_C14_A	DR	C	9	4	2.206	13760	0.016032	1016	126	0.1239	195539	1.865	1.808	30	25	74	25
Dr_C14_A	DR	C	9	5	2.774	13760	0.0201599	1004	120.3	0.1198	193257	1.865	1.808	30	25	74	25
Dr_C14_A	DR	C	9	6	3.346	13760	0.0243169	992.6	130.8	0.1318	190981	1.865	1.808	30	25	74	25
Dr_C14_A	DR	C	9	7	3.912	13760	0.0284302	972.4	129.2	0.1329	187089	1.865	1.808	30	25	74	25
Dr_C14_A	DR	C	9	8	4.486	13760	0.0326017	967.6	131.2	0.1356	186165	1.865	1.808	30	25	74	25
Dr_C14_A	DR	C	9	9	5.053	13760	0.0367224	947.9	131.9	0.1392	182375	1.865	1.808	30	25	74	25
Dr_C14_A	DR	C	9	10	5.623	13760	0.0408648	942	138.3	0.1468	181249	1.865	1.808	30	25	74	25
Dr_C14_A	DR	C	9	11	6.19	13760	0.0449855	927.5	133.4	0.1439	178454	1.865	1.808	30	25	74	25
Dr_C14_A	DR	C	9	12	6.755	13760	0.0490916	915.9	141.7	0.1547	176232	1.865	1.808	30	25	74	25
Dr_C14_A	DR	C	9	13	7.332	13760	0.0532849	909.3	142	0.1561	174959	1.865	1.808	30	25	74	25
Dr_C14_A	DR	C	9	14	7.901	13760	0.0574201	898.8	139.2	0.1549	172930	1.865	1.808	30	25	74	25
Dr_C14_A	DR	C	9	15	8.469	13760	0.061548	884.7	140	0.1583	170224	1.865	1.808	30	25	74	25
Dr_C14_A	DR	C	9	16	9.038	13760	0.0656831	874.5	146.2	0.1671	168251	1.865	1.808	30	25	74	25
Dr_C14_A	DR	C	9	17	9.617	13760	0.069891	867.6	146.7	0.1691	166931	1.865	1.808	30	25	74	25
Dr_C14_A	DR	C	9	18	10.18	13760	0.0739826	860	148.1	0.1722	165464	1.865	1.808	30	25	74	25
Dr_C14_A	DR	C	9	19	10.75	13760	0.078125	852.3	147.3	0.1729	163982	1.865	1.808	30	25	74	25
Dr_C14_A	DR	C	9	20	11.32	13760	0.0822674	844.2	146.9	0.174	162425	1.865	1.808	30	25	74	25
Dr_C14_A	DR	C	9	21	11.88	13760	0.0863372	834.7	147	0.1761	160601	1.865	1.808	30	25	74	25
Dr_C14_A	DR	C	9	22	12.47	13760	0.090625	825.8	147.9	0.1791	158883	1.865	1.808	30	25	74	25
Dr_C14_A	DR	C	9	23	13.02	13760	0.0946221	819.8	152.3	0.1858	157740	1.865	1.808	30	25	74	25
Dr_C14_A	DR	C	9	24	13.59	13760	0.0987645	810.7	152	0.1875	155988	1.865	1.808	30	25	74	25
Dr_C14_A	DR	C	9	25	14.16	13760	0.102907	805.7	153.6	0.1907	155014	1.865	1.808	30	25	74	25
Dr_C14_A	DR	C	9	26	14.73	13760	0.107049	801.2	154	0.1922	154155	1.865	1.808	30	25	74	25
Dr_C14_A	DR	C	9	27	15.3	13760	0.111192	796	154.4	0.194	153151	1.865	1.808	30	25	74	25
Dr_C14_A	DR	C	9	28	15.87	13760	0.115334	790.4	154	0.1948	152079	1.865	1.808	30	25	74	25
Dr_C14_A	DR	C	9	29	16.43	13760	0.119404	784.5	154.3	0.1967	150937	1.865	1.808	30	25	74	25
Dr_C14_A	DR	C	9	30	17	13760	0.123547	778.7	153.6	0.1972	149826	1.865	1.808	30	25	74	25
Dr_C14_B	DR	C	9	1	0.5	13960	0.00358166	986.4	108.3	0.1098	185445	1.873	1.785	27	22	65	21.5
Dr_C14_B	DR	C	9	2	1.069	13960	0.00765759	975.6	122.2	0.1252	183411	1.873	1.785	27	22	65	21.5
Dr_C14_B	DR	C	9	3	1.636	13960	0.0117192	958.2	123.8	0.1292	180147	1.873	1.785	27	22	65	21.5
Dr_C14_B	DR	C	9	4	2.205	13960	0.0157951	941.5	116.4	0.1237	176995	1.873	1.785	27	22	65	21.5
Dr_C14_B	DR	C	9	5	2.776	13960	0.0198854	936.3	119.3	0.1274	176031	1.873	1.785	27	22	65	21.5
Dr_C14_B	DR	C	9	6	3.346	13960	0.0239685	916.5	132.3	0.1444	172306	1.873	1.785	27	22	65	21.5
Dr_C14_B	DR	C	9	7	3.913	13960	0.0280301	903.9	124.2	0.1374	169937	1.873	1.785	27	22	65	21.5
Dr_C14_B	DR	C	9	8	4.484	13960	0.0321203	890.9	135.9	0.1526	167480	1.873	1.785	27	22	65	21.5
Dr_C14_B	DR	C	9	9	5.054	13960	0.0362034	880.9	129	0.1464	165612	1.873	1.785	27	22	65	21.5
Dr_C14_B	DR	C	9	10	5.619	13960	0.0402507	868	138.4	0.1595	163183	1.873	1.785	27	22	65	21.5
Dr_C14_B	DR	C	9	11	6.193	13960	0.0443625	862.4	135.3	0.1569	162135	1.873	1.785	27	22	65	21.5
Dr_C14_B	DR	C	9	12	6.76	13960	0.0484241	846	137	0.162	159050	1.873	1.785	27	22	65	21.5
Dr_C14_B	DR	C	9	13	7.329	13960	0.0525	838.9	143.9	0.1715	157719	1.873	1.785	27	22	65	21.5
Dr_C14_B	DR	C	9	14	7.899	13960	0.0565831	832.7	144.5	0.1735	156554	1.873	1.785	27	22	65	21.5
Dr_C14_B	DR	C	9	15	8.467	13960	0.0606519	822	143.2	0.1742	154529	1.873	1.785	27	22	65	21.5
Dr_C14_B	DR	C	9	16	9.034	13960	0.0647135	809.7	145.2	0.1793	152218	1.873	1.785	27	22	65	21.5
Dr_C14_B	DR	C	9	17	9.608	13960	0.0688252	799.8	148.7	0.186	150356	1.873	1.785	27	22	65	21.5
Dr_C14_B	DR	C	9	18	10.18	13960	0.0729226	792.7	152.1	0.1918	149031	1.873	1.785	27	22	65	21.5
Dr_C14_B	DR	C	9	19	10.75	13960	0.0770057	785.7	154.4	0.1966	147709	1.873	1.785	27	22	65	21.5
Dr_C14_B	DR	C	9	20	11.31	13960	0.0810172	779.5	155.5	0.1995	146540	1.873	1.785	27	22	65	21.5
Dr_C14_B	DR	C	9	21	11.88	13960	0.0851003	772.8	156	0.2019	145291	1.873	1.785	27	22	65	21.5
Dr_C14_B	DR	C	9	22	12.45	13960	0.0891834	766.2	155.9	0.2035	144046	1.873	1.785	27	22	65	21.5
Dr_C14_B	DR	C	9	23	13.02	13960	0.0932665	759	155.8	0.2052	142691	1.873	1.785	27	22	65	21.5
Dr_C14_B	DR	C	9	24	13.59	13960	0.0973496	751.5	156.8	0.2087	141286	1.873	1.785	27	22	65	21.5
Dr_C14_B	DR	C	9	25	14.16	13960	0.101433	744.7	157.5	0.2114	140011	1.873	1.785	27	22	65	21.5
Dr_C14_B	DR	C	9	26	14.73	13960	0.105516	738.8	158.9	0.2151	138888	1.873	1.785	27	22	65	21.5
Dr_C14_B	DR	C	9	27	15.3	13960	0.109599	733.6	160.7	0.219	137908	1.873	1.785	27	22	65	21.5
Dr_C14_B	DR	C	9	28	15.87	13960	0.113682	729.3	162	0.2222	137112	1.873	1.785	27	22	65	21.5
Dr_C14_B	DR	C	9	29	16.43	13960	0.117693	725.8	162.6	0.2241	136455	1.873	1.785	27	22	65	21.5
Dr_C14_B	DR	C	9	30	17	13960	0.121777	722.2	162.8	0.2254	135767	1.873	1.785	27	22	65	21.5
Dr_L01_B	DR	L	10	1	0.5002	14480	0.00345442	684	74.79	0.1093	140638	1.86	2.038	27	22	68	22
Dr_L01_B	DR	L	10	2	1.068	14480	0.00737569	676.4	85.78	0.1268	139084	1.86	2.038	27	22	68	22
Dr_L01_B	DR	L	10	3	1.635	14480	0.0112914	664.9	85.74	0.129	136714	1.86	2.038	27	22	68	22
Dr_L01_B	DR	L	10	4	2.205	14480	0.0152279	652.5	78.18	0.1198	134165	1.86	2.038	27	22	68	22
Dr_L01_B	DR	L	10	5	2.777	14480	0.0191782	650.2	81.84	0.1259	133699	1.86	2.038	27	22	68	22
Dr_L01_B	DR	L	10	6	3.342	14480	0.0230801	637.2	88.81	0.1394	131020	1.86	2.038	27	22	68	22
Dr_L01_B	DR	L	10	7	3.915	14480	0.0270373	630	83.15	0.132	129532	1.86	2.038	27	22	68	22
Dr_L01_B	DR	L	10	8	4.482	14480	0.030953	619.6	90.45	0.146	127404	1.86	2.038	27	22	68	22
Dr_L01_B	DR	L	10	9	5.053	14480	0.0348964	615.3	86.1	0.1399	126511	1.86	2.038	27	22	68	22
Dr_L01_B	DR	L	10	10	5.619	14480	0.0388052	607.1	91.69	0.151	124824	1.86	2.038	27	22	68	22
Dr_L01_B	DR	L	10	11	6.192	14480	0.0427624	604.6	91.31	0.151	124310	1.86	2.038	27	22	68	22
Dr_L01_B	DR	L	10	12	6.758	14480	0.0466713	596.4	89.04	0.1493	122620	1.86	2.038	27	22	68	22
Dr_L01_B	DR	L	10	13	7.325	14480	0.050587	589.7	93.77	0.159	121261	1.86	2.038	27	22	68	22
Dr_L01_B	DR	L	10	14	7.899	14480	0.0545511	587.9	94.49	0.1607	120875	1.86	2.038	27	22	68	22
Dr_L01_B	DR	L	10	15	8.467	14480	0.0584738	583.2	92.97	0.1594	119923	1.86	2.038	27	22	68	22
Dr_L01_B	DR	L	10	16	9.035	14480	0.0623964	575.9	93.06	0.1616	118421	1.86	2.038	27	22	68	22
Dr_L01_B	DR	L	10	17	9.608	14480	0.0663536	571	95.96	0.1681	117401	1.86	2.038	27	22	68	22
Dr_L01_B	DR	L	10	18	10.18	14480	0.0703039	566.3	96.29	0.17	116434	1.86	2.038	27	22	68	22
Dr_L01_B	DR	L	10	19	10.75	14480	0.0742403	562.6	97.79	0.1738	115687	1.86	2.038	27	22	68	22
Dr_L01_B	DR	L	10	20	11.31	14480	0.0781077	559.8	98.65	0.1762	115108	1.86	2.038	27	22	68	22
Dr_L01_B	DR	L	10	21	11.88	14480	0.0820442	557.1	99.06	0.1778	114556	1.86	2.038	27	22	68	22
Dr_L01_B	DR	L	10	22	12.45	14480	0.0859807	554	98.95	0.1786	113904	1.86	2.038	27	22	68	22
Dr_L01_B	DR	L	10	23	13.01	14480	0.0898481	550.8	98.81	0.1794	113243	1.86	2.038	27	22	68	22
Dr_L01_B	DR	L	10	24	13.59	14480	0.0938536	546.7	98.94	0.181	112401	1.86	2.038	27	22	68	22
Dr_L01_B	DR	L	10	25	14.16	14480	0.0977901	543	99.81	0.1838	111640	1.86	2.038	27	22	68	22
Dr_L01_B	DR	L	10	26	14.73	14480	0.101727	539.5	101.3	0.1878	110932	1.86	2.038	27	22	68	22
Dr_L01_B	DR	L	10	27	15.29	14480	0.105594	537.1	102.7	0.1912	110444	1.86	2.038	27	22	68	22
Dr_L01_B	DR	L	10	28	15.86	14480	0.10953	535.2	103.9	0.1941	110037	1.86	2.038	27	22	68	22
Dr_L01_B	DR	L	10	29	16.43	14480	0.113467	534.1	104.5	0.1956	109827	1.86	2.038	27	22	68	22
Dr_L01_B	DR	L	10	30	16.99	14480	0.117334	532.9	104.7	0.1965	109573	1.86	2.038	27	22	68	22
Dr_L02_A	DR	L	11	1	0.5	14880	0.00336022	823	80.3	0.09757	123339	1.39	2.043	32	27	58	27.5
Dr_L02_A	DR	L	11	2	1.068	14880	0.00717742	822.7	83.86	0.1019	123289	1.39	2.043	32	27	58	27.5
Dr_L02_A	DR	L	11	3	1.638	14880	0.0110081	811.2	79.98	0.0986	121560	1.39	2.043	32	27	58	27.5
Dr_L02_A	DR	L	11	4	2.209	14880	0.0148454	809.9	86.36	0.1066	121369	1.39	2.043	32	27	58	27.5
Dr_L02_A	DR	L	11	5	2.774	14880	0.0186425	794.8	94.21	0.1185	119116	1.39	2.043	32	27	58	27.5
Dr_L02_A	DR	L	11	6	3.344	14880	0.0224731	789.8	86.87	0.11	118361	1.39	2.043	32	27	58	27.5
Dr_L02_A	DR	L	11	7	3.914	14880	0.0263038	784.9	96.81	0.1233	117621	1.39	2.043	32	27	58	27.5
Dr_L02_A	DR	L	11	8	4.482	14880	0.030121	773.5	93.03	0.1203	115912	1.39	2.043	32	27	58	27.5
Dr_L02_A	DR	L	11	9	5.052	14880	0.0339516	769.4	101.1	0.1314	115304	1.39	2.043	32	27	58	27.5
Dr_L02_A	DR	L	11	10	5.621	14880	0.0377755	762.5	97.09	0.1273	114268	1.39	2.043	32	27	58	27.5
Dr_L02_A	DR	L	11	11	6.188	14880	0.041586	753.5	104.4	0.1386	112918	1.39	2.043	32	27	58	27.5
Dr_L02_A	DR	L	11	12	6.762	14880	0.0454435	751.1	102.5	0.1365	112562	1.39	2.043	32	27	58	27.5
Dr_L02_A	DR	L	11	13	7.326	14880	0.0492339	741	103.6	0.1398	111050	1.39	2.043	32	27	58	27.5
Dr_L02_A	DR	L	11	14	7.896	14880	0.0530645	736.8	109.1	0.1481	110424	1.39	2.043	32	27	58	27.5
Dr_L02_A	DR	L	11	15	8.466	14880	0.0568952	734.3	109.5	0.1492	110044	1.39	2.043	32	27	58	27.5
Dr_L02_A	DR	L	11	16	9.035	14880	0.0607191	728.4	108.3	0.1486	109161	1.39	2.043	32	27	58	27.5
Dr_L02_A	DR	L	11	17	9.603	14880	0.0645363	721.6	109.1	0.1512	108139	1.39	2.043	32	27	58	27.5
Dr_L02_A	DR	L	11	18	10.17	14880	0.0683468	715.9	110.7	0.1546	107286	1.39	2.043	32	27	58	27.5
Dr_L02_A	DR	L	11	19	10.75	14880	0.0722446	710.3	113	0.159	106444	1.39	2.043	32	27	58	27.5
Dr_L02_A	DR	L	11	20	11.31	14880	0.0760081	705.6	115.3	0.1635	105745	1.39	2.043	32	27	58	27.5
Dr_L02_A	DR	L	11	21	11.88	14880	0.0798387	702.6	117.4	0.1671	105292	1.39	2.043	32	27	58	27.5
Dr_L02_A	DR	L	11	22	12.45	14880	0.0836694	700.2	118.4	0.1691	104928	1.39	2.043	32	27	58	27.5
Dr_L02_A	DR	L	11	23	13.01	14880	0.0874328	697.6	118.7	0.1702	104544	1.39	2.043	32	27	58	27.5
Dr_L02_A	DR	L	11	24	13.6	14880	0.0913978	693	119.7	0.1727	103855	1.39	2.043	32	27	58	27.5
Dr_L02_A	DR	L	11	25	14.15	14880	0.0950941	689.5	118.6	0.172	103326	1.39	2.043	32	27	58	27.5
Dr_L02_A	DR	L	11	26	14.72	14880	0.0989247	684.9	119.4	0.1743	102643	1.39	2.043	32	27	58	27.5
Dr_L02_A	DR	L	11	27	15.29	14880	0.102755	681.5	120.7	0.1771	102134	1.39	2.043	32	27	58	27.5
Dr_L02_A	DR	L	11	28	15.86	14880	0.106586	676.7	121.6	0.1797	101411	1.39	2.043	32	27	58	27.5
Dr_L02_A	DR	L	11	29	16.43	14880	0.110417	674.3	123.5	0.1831	101048	1.39	2.043	32	27	58	27.5
Dr_L02_A	DR	L	11	30	16.99	14880	0.11418	672.4	124.8	0.1856	100767	1.39	2.043	32	27	58	27.5
Dr_L02_B	DR	L	11	1	0.5	15620	0.00320102	901.5	92.29	0.1024	206614	2.113	2.158	31	26	74	25.5
Dr_L02_B	DR	L	11	2	1.07	15620	0.00685019	867.8	98.06	0.113	198884	2.113	2.158	31	26	74	25.5
Dr_L02_B	DR	L	11	3	1.638	15620	0.0104866	852.2	104	0.1221	195311	2.113	2.158	31	26	74	25.5
Dr_L02_B	DR	L	11	4	2.205	15620	0.0141165	838.9	102	0.1216	192275	2.113	2.158	31	26	74	25.5
Dr_L02_B	DR	L	11	5	2.773	15620	0.0177529	828.4	96.57	0.1166	189856	2.113	2.158	31	26	74	25.5
Dr_L02_B	DR	L	11	6	3.347	15620	0.0214277	826.6	102.2	0.1236	189460	2.113	2.158	31	26	74	25.5
Dr_L02_B	DR	L	11	7	3.911	15620	0.0250384	807.2	108.4	0.1343	185005	2.113	2.158	31	26	74	25.5
Dr_L02_B	DR	L	11	8	4.485	15620	0.0287132	804	105	0.1305	184281	2.113	2.158	31	26	74	25.5
Dr_L02_B	DR	L	11	9	5.051	15620	0.0323367	791.1	113.3	0.1432	181315	2.113	2.158	31	26	74	25.5
Dr_L02_B	DR	L	11	10	5.625	15620	0.0360115	785.2	109.5	0.1395	179966	2.113	2.158	31	26	74	25.5
Dr_L02_B	DR	L	11	11	6.188	15620	0.0396159	771.8	114	0.1478	176892	2.113	2.158	31	26	74	25.5
Dr_L02_B	DR	L	11	12	6.761	15620	0.0432843	765.9	117.3	0.1532	175550	2.113	2.158	31	26	74	25.5
Dr_L02_B	DR	L	11	13	7.331	15620	0.0469334	761.7	116.1	0.1524	174583	2.113	2.158	31	26	74	25.5
Dr_L02_B	DR	L	11	14	7.896	15620	0.0505506	750.8	115.9	0.1544	172074	2.113	2.158	31	26	74	25.5
Dr_L02_B	DR	L	11	15	8.465	15620	0.0541933	740.8	121.8	0.1645	169791	2.113	2.158	31	26	74	25.5
Dr_L02_B	DR	L	11	16	9.037	15620	0.0578553	737.2	124.7	0.1692	168956	2.113	2.158	31	26	74	25.5
Dr_L02_B	DR	L	11	17	9.606	15620	0.0614981	731.3	125.6	0.1717	167614	2.113	2.158	31	26	74	25.5
Dr_L02_B	DR	L	11	18	10.17	15620	0.0651088	725	125.8	0.1735	166174	2.113	2.158	31	26	74	25.5
Dr_L02_B	DR	L	11	19	10.74	15620	0.068758	718	126.3	0.1759	164567	2.113	2.158	31	26	74	25.5
Dr_L02_B	DR	L	11	20	11.31	15620	0.0724072	710	127.5	0.1796	162732	2.113	2.158	31	26	74	25.5
Dr_L02_B	DR	L	11	21	11.88	15620	0.0760563	703.9	129.6	0.1842	161324	2.113	2.158	31	26	74	25.5
Dr_L02_B	DR	L	11	22	12.44	15620	0.0796415	696.2	132.5	0.1903	159558	2.113	2.158	31	26	74	25.5
Dr_L02_B	DR	L	11	23	13.02	15620	0.0833547	692.4	134.6	0.1943	158699	2.113	2.158	31	26	74	25.5
Dr_L02_B	DR	L	11	24	13.59	15620	0.0870038	689	136.2	0.1977	157927	2.113	2.158	31	26	74	25.5
Dr_L02_B	DR	L	11	25	14.15	15620	0.090589	685.6	137.1	0.2	157133	2.113	2.158	31	26	74	25.5
Dr_L02_B	DR	L	11	26	14.72	15620	0.0942382	682.2	137.6	0.2017	156363	2.113	2.158	31	26	74	25.5
Dr_L02_B	DR	L	11	27	15.29	15620	0.0978873	678.4	137.6	0.2029	155481	2.113	2.158	31	26	74	25.5
Dr_L02_B	DR	L	11	28	15.86	15620	0.101536	673.8	137.7	0.2044	154433	2.113	2.158	31	26	74	25.5
Dr_L02_B	DR	L	11	29	16.43	15620	0.105186	669.4	138.6	0.207	153412	2.113	2.158	31	26	74	25.5
Dr_L02_B	DR	L	11	30	17	15620	0.108835	665	139.8	0.2103	152415	2.113	2.158	31	26	74	25.5
Dr_L03_A	DR	L	12	1	0.5	15660	0.00319285	1588	124.6	0.07844	278846	1.825	1.928	31	26	75.5	26
Dr_L03_A	DR	L	12	2	1.002	15660	0.00639847	1554	125.6	0.08082	272877	1.825	1.928	31	26	75.5	26
Dr_L03_A	DR	L	12	3	1.502	15660	0.00959131	1548	129.9	0.08388	271864	1.825	1.928	31	26	75.5	26
Dr_L03_A	DR	L	12	4	2.002	15660	0.0127842	1535	139.9	0.09112	269486	1.825	1.928	31	26	75.5	26
Dr_L03_A	DR	L	12	5	2.498	15660	0.0159515	1503	145.7	0.09693	263822	1.825	1.928	31	26	75.5	26
Dr_L03_A	DR	L	12	6	2.999	15660	0.0191507	1490	138.5	0.09294	261583	1.825	1.928	31	26	75.5	26
Dr_L03_A	DR	L	12	7	3.501	15660	0.0223563	1481	154.4	0.1043	259935	1.825	1.928	31	26	75.5	26
Dr_L03_A	DR	L	12	8	3.999	15660	0.0255364	1459	148.2	0.1016	256113	1.825	1.928	31	26	75.5	26
Dr_L03_A	DR	L	12	9	4.502	15660	0.0287484	1452	162.2	0.1117	254900	1.825	1.928	31	26	75.5	26
Dr_L03_A	DR	L	12	10	5.002	15660	0.0319413	1436	153.5	0.1069	252168	1.825	1.928	31	26	75.5	26
Dr_L03_A	DR	L	12	11	5.501	15660	0.0351277	1418	167.8	0.1183	248943	1.825	1.928	31	26	75.5	26
Dr_L03_A	DR	L	12	12	6.004	15660	0.0383397	1414	167	0.1181	248255	1.825	1.928	31	26	75.5	26
Dr_L03_A	DR	L	12	13	6.504	15660	0.0415326	1396	164	0.1175	245178	1.825	1.928	31	26	75.5	26
Dr_L03_A	DR	L	12	14	7.002	15660	0.0447126	1376	172.5	0.1254	241598	1.825	1.928	31	26	75.5	26
Dr_L03_A	DR	L	12	15	7.502	15660	0.0479055	1370	179.2	0.1308	240596	1.825	1.928	31	26	75.5	26
Dr_L03_A	DR	L	12	16	8.003	15660	0.0511047	1360	178.8	0.1314	238859	1.825	1.928	31	26	75.5	26
Dr_L03_A	DR	L	12	17	8.505	15660	0.0543103	1343	180.8	0.1346	235871	1.825	1.928	31	26	75.5	26
Dr_L03_A	DR	L	12	18	9.004	15660	0.0574968	1328	184.3	0.1388	233114	1.825	1.928	31	26	75.5	26
Dr_L03_A	DR	L	12	19	9.504	15660	0.0606897	1315	187.8	0.1428	230933	1.825	1.928	31	26	75.5	26
Dr_L03_A	DR	L	12	20	10.01	15660	0.0639208	1303	191.8	0.1472	228740	1.825	1.928	31	26	75.5	26
Dr_L03_A	DR	L	12	21	10.5	15660	0.0670498	1293	196	0.1515	227073	1.825	1.928	31	26	75.5	26
Dr_L03_A	DR	L	12	22	11	15660	0.0702427	1285	199.3	0.1551	225539	1.825	1.928	31	26	75.5	26
Dr_L03_A	DR	L	12	23	11.5	15660	0.0734355	1276	200.7	0.1572	224087	1.825	1.928	31	26	75.5	26
Dr_L03_A	DR	L	12	24	12	15660	0.0766284	1268	201.1	0.1585	222707	1.825	1.928	31	26	75.5	26
Dr_L03_A	DR	L	12	25	12.5	15660	0.0798212	1259	200.9	0.1596	221021	1.825	1.928	31	26	75.5	26
Dr_L03_A	DR	L	12	26	13	15660	0.083014	1248	201	0.161	219146	1.825	1.928	31	26	75.5	26
Dr_L03_A	DR	L	12	27	13.51	15660	0.0862708	1238	202.5	0.1636	217266	1.825	1.928	31	26	75.5	26
Dr_L03_A	DR	L	12	28	14.02	15660	0.0895275	1227	205	0.1671	215396	1.825	1.928	31	26	75.5	26
Dr_L03_A	DR	L	12	29	14.51	15660	0.0926565	1217	207.9	0.1709	213648	1.825	1.928	31	26	75.5	26
Dr_L03_A	DR	L	12	30	15.01	15660	0.0958493	1209	210.6	0.1742	212204	1.825	1.928	31	26	75.5	26
Dr_L03_B	DR	L	12	1	0.4998	16210	0.00308328	1044	81.36	0.07791	182456	1.903	1.895	25	20	59.5	20
Dr_L03_B	DR	L	12	2	1.068	16210	0.00658853	1043	95.15	0.0912	182299	1.903	1.895	25	20	59.5	20
Dr_L03_B	DR	L	12	3	1.638	16210	0.0101049	1042	98.89	0.09493	182011	1.903	1.895	25	20	59.5	20
Dr_L03_B	DR	L	12	4	2.205	16210	0.0136027	1027	90.92	0.0885	179496	1.903	1.895	25	20	59.5	20
Dr_L03_B	DR	L	12	5	2.777	16210	0.0171314	1028	92.93	0.09041	179589	1.903	1.895	25	20	59.5	20
Dr_L03_B	DR	L	12	6	3.346	16210	0.0206416	1012	107.9	0.1066	176780	1.903	1.895	25	20	59.5	20
Dr_L03_B	DR	L	12	7	3.913	16210	0.0241394	1003	99.88	0.09961	175211	1.903	1.895	25	20	59.5	20
Dr_L03_B	DR	L	12	8	4.484	16210	0.0276619	993.6	112.6	0.1134	173607	1.903	1.895	25	20	59.5	20
Dr_L03_B	DR	L	12	9	5.053	16210	0.0311721	984.7	106.7	0.1084	172055	1.903	1.895	25	20	59.5	20
Dr_L03_B	DR	L	12	10	5.619	16210	0.0346638	973.6	117.5	0.1207	170114	1.903	1.895	25	20	59.5	20
Dr_L03_B	DR	L	12	11	6.191	16210	0.0381925	970.4	114.4	0.1179	169549	1.903	1.895	25	20	59.5	20
Dr_L03_B	DR	L	12	12	6.759	16210	0.0416965	954.6	118	0.1236	166787	1.903	1.895	25	20	59.5	20
Dr_L03_B	DR	L	12	13	7.33	16210	0.045219	948.1	126	0.1329	165654	1.903	1.895	25	20	59.5	20
Dr_L03_B	DR	L	12	14	7.899	16210	0.0487292	942.8	126.9	0.1346	164731	1.903	1.895	25	20	59.5	20
Dr_L03_B	DR	L	12	15	8.479	16210	0.0523072	928.6	135	0.1454	162257	1.903	1.895	25	20	59.5	20
Dr_L03_B	DR	L	12	16	9.035	16210	0.0557372	917.9	128.7	0.1402	160379	1.903	1.895	25	20	59.5	20
Dr_L03_B	DR	L	12	17	9.603	16210	0.0592412	910.8	132.7	0.1457	159144	1.903	1.895	25	20	59.5	20
Dr_L03_B	DR	L	12	18	10.18	16210	0.0628007	903.6	136.3	0.1508	157879	1.903	1.895	25	20	59.5	20
Dr_L03_B	DR	L	12	19	10.75	16210	0.0663171	897	139.3	0.1553	156723	1.903	1.895	25	20	59.5	20
Dr_L03_B	DR	L	12	20	11.31	16210	0.0697717	891.3	141	0.1581	155736	1.903	1.895	25	20	59.5	20
Dr_L03_B	DR	L	12	21	11.88	16210	0.0732881	885.1	142	0.1604	154653	1.903	1.895	25	20	59.5	20
Dr_L03_B	DR	L	12	22	12.45	16210	0.0768044	877.3	143	0.163	153283	1.903	1.895	25	20	59.5	20
Dr_L03_B	DR	L	12	23	13.02	16210	0.0803208	870	142.5	0.1638	152004	1.903	1.895	25	20	59.5	20
Dr_L03_B	DR	L	12	24	13.59	16210	0.0838371	862	143.5	0.1665	150607	1.903	1.895	25	20	59.5	20
Dr_L03_B	DR	L	12	25	14.16	16210	0.0873535	855	145.1	0.1697	149394	1.903	1.895	25	20	59.5	20
Dr_L03_B	DR	L	12	26	14.73	16210	0.0908698	848.4	147.1	0.1734	148233	1.903	1.895	25	20	59.5	20
Dr_L03_B	DR	L	12	27	15.31	16210	0.0944479	842	149.8	0.178	147117	1.903	1.895	25	20	59.5	20
Dr_L03_B	DR	L	12	28	15.87	16210	0.0979025	837.4	151.5	0.181	146310	1.903	1.895	25	20	59.5	20
Dr_L03_B	DR	L	12	29	16.43	16210	0.101357	833.2	152.4	0.1828	145588	1.903	1.895	25	20	59.5	20
Dr_L03_B	DR	L	12	30	17	16210	0.104874	828.7	152.8	0.1844	144799	1.903	1.895	25	20	59.5	20
Dr_L04_A	DR	L	13	1	0.4998	14860	0.00336339	633.4	60.9	0.09615	114326	1.653	2.068	28	23	55.5	24.5
Dr_L04_A	DR	L	13	2	1.069	14860	0.00719381	624.2	62.02	0.09937	112662	1.653	2.068	28	23	55.5	24.5
Dr_L04_A	DR	L	13	3	1.639	14860	0.0110296	614	60.09	0.09787	110832	1.653	2.068	28	23	55.5	24.5
Dr_L04_A	DR	L	13	4	2.209	14860	0.0148654	613.4	65.72	0.1071	110714	1.653	2.068	28	23	55.5	24.5
Dr_L04_A	DR	L	13	5	2.776	14860	0.018681	600.1	72.32	0.1205	108318	1.653	2.068	28	23	55.5	24.5
Dr_L04_A	DR	L	13	6	3.344	14860	0.0225034	595.5	66.49	0.1116	107494	1.653	2.068	28	23	55.5	24.5
Dr_L04_A	DR	L	13	7	3.914	14860	0.0263392	589.7	74.16	0.1258	106443	1.653	2.068	28	23	55.5	24.5
Dr_L04_A	DR	L	13	8	4.483	14860	0.0301682	584.4	69.22	0.1185	105480	1.653	2.068	28	23	55.5	24.5
Dr_L04_A	DR	L	13	9	5.053	14860	0.034004	578	74.96	0.1297	104334	1.653	2.068	28	23	55.5	24.5
Dr_L04_A	DR	L	13	10	5.621	14860	0.0378264	575.2	71.2	0.1238	103820	1.653	2.068	28	23	55.5	24.5
Dr_L04_A	DR	L	13	11	6.189	14860	0.0416487	568.5	75.47	0.1328	102605	1.653	2.068	28	23	55.5	24.5
Dr_L04_A	DR	L	13	12	6.758	14860	0.0454778	568	75.53	0.133	102525	1.653	2.068	28	23	55.5	24.5
Dr_L04_A	DR	L	13	13	7.325	14860	0.0492934	563.4	76.99	0.1367	101688	1.653	2.068	28	23	55.5	24.5
Dr_L04_A	DR	L	13	14	7.896	14860	0.0531359	556.2	77.2	0.1388	100386	1.653	2.068	28	23	55.5	24.5
Dr_L04_A	DR	L	13	15	8.467	14860	0.0569785	555.4	78.19	0.1408	100255	1.653	2.068	28	23	55.5	24.5
Dr_L04_A	DR	L	13	16	9.037	14860	0.0608143	552	76.93	0.1394	99643	1.653	2.068	28	23	55.5	24.5
Dr_L04_A	DR	L	13	17	9.606	14860	0.0646433	547.2	77.17	0.141	98774	1.653	2.068	28	23	55.5	24.5
Dr_L04_A	DR	L	13	18	10.17	14860	0.0684388	542.3	77.94	0.1437	97878	1.653	2.068	28	23	55.5	24.5
Dr_L04_A	DR	L	13	19	10.75	14860	0.0723419	538.2	79.25	0.1473	97140	1.653	2.068	28	23	55.5	24.5
Dr_L04_A	DR	L	13	20	11.3	14860	0.0760431	534.8	80.99	0.1514	96537	1.653	2.068	28	23	55.5	24.5
Dr_L04_A	DR	L	13	21	11.89	14860	0.0800135	531.4	82.31	0.1549	95925	1.653	2.068	28	23	55.5	24.5
Dr_L04_A	DR	L	13	22	12.45	14860	0.083782	529.4	83.22	0.1572	95548	1.653	2.068	28	23	55.5	24.5
Dr_L04_A	DR	L	13	23	13.02	14860	0.0876178	527.3	83.66	0.1587	95184	1.653	2.068	28	23	55.5	24.5
Dr_L04_A	DR	L	13	24	13.59	14860	0.0914536	524.6	83.63	0.1594	94691	1.653	2.068	28	23	55.5	24.5
Dr_L04_A	DR	L	13	25	14.16	14860	0.0952894	521.3	83.36	0.1599	94100	1.653	2.068	28	23	55.5	24.5
Dr_L04_A	DR	L	13	26	14.72	14860	0.0990579	518	83.52	0.1612	93507	1.653	2.068	28	23	55.5	24.5
Dr_L04_A	DR	L	13	27	15.3	14860	0.102961	514.6	84.06	0.1634	92887	1.653	2.068	28	23	55.5	24.5
Dr_L04_A	DR	L	13	28	15.86	14860	0.106729	511.7	85.1	0.1663	92357	1.653	2.068	28	23	55.5	24.5
Dr_L04_A	DR	L	13	29	16.44	14860	0.110633	509.3	86.27	0.1694	91927	1.653	2.068	28	23	55.5	24.5
Dr_L04_A	DR	L	13	30	17	14860	0.114401	507.4	87.3	0.1721	91580	1.653	2.068	28	23	55.5	24.5
Dr_L04_B	DR	L	13	1	0.5	14360	0.00348189	672.9	66.59	0.09896	177322	1.928	2.5	28	23	67.5	23.5
Dr_L04_B	DR	L	13	2	1.07	14360	0.00745125	669	74.72	0.1117	176300	1.928	2.5	28	23	67.5	23.5
Dr_L04_B	DR	L	13	3	1.639	14360	0.0114136	660.7	77.18	0.1168	174094	1.928	2.5	28	23	67.5	23.5
Dr_L04_B	DR	L	13	4	2.205	14360	0.0153552	647.8	75.79	0.117	170702	1.928	2.5	28	23	67.5	23.5
Dr_L04_B	DR	L	13	5	2.779	14360	0.0193524	640.5	82.14	0.1282	168776	1.928	2.5	28	23	67.5	23.5
Dr_L04_B	DR	L	13	6	3.347	14360	0.0233078	637.9	77.36	0.1213	168092	1.928	2.5	28	23	67.5	23.5
Dr_L04_B	DR	L	13	7	3.912	14360	0.0272423	625.8	77.19	0.1234	164896	1.928	2.5	28	23	67.5	23.5
Dr_L04_B	DR	L	13	8	4.484	14360	0.0312256	625.1	79.82	0.1277	164720	1.928	2.5	28	23	67.5	23.5
Dr_L04_B	DR	L	13	9	5.05	14360	0.0351671	613.3	78.84	0.1286	161608	1.928	2.5	28	23	67.5	23.5
Dr_L04_B	DR	L	13	10	5.621	14360	0.0391435	611.1	83.41	0.1365	161037	1.928	2.5	28	23	67.5	23.5
Dr_L04_B	DR	L	13	11	6.19	14360	0.0431059	604.4	79.47	0.1315	159274	1.928	2.5	28	23	67.5	23.5
Dr_L04_B	DR	L	13	12	6.76	14360	0.0470752	596.7	83.55	0.14	157230	1.928	2.5	28	23	67.5	23.5
Dr_L04_B	DR	L	13	13	7.33	14360	0.0510446	595.2	84.62	0.1422	156836	1.928	2.5	28	23	67.5	23.5
Dr_L04_B	DR	L	13	14	7.899	14360	0.055007	590.7	83.04	0.1406	155648	1.928	2.5	28	23	67.5	23.5
Dr_L04_B	DR	L	13	15	8.468	14360	0.0589694	582.2	82.75	0.1421	153423	1.928	2.5	28	23	67.5	23.5
Dr_L04_B	DR	L	13	16	9.037	14360	0.0629318	576.8	86.66	0.1502	152004	1.928	2.5	28	23	67.5	23.5
Dr_L04_B	DR	L	13	17	9.606	14360	0.0668941	574.2	87.46	0.1523	151317	1.928	2.5	28	23	67.5	23.5
Dr_L04_B	DR	L	13	18	10.18	14360	0.0708914	569.7	87.9	0.1543	150118	1.928	2.5	28	23	67.5	23.5
Dr_L04_B	DR	L	13	19	10.75	14360	0.0748607	565.6	87.54	0.1548	149048	1.928	2.5	28	23	67.5	23.5
Dr_L04_B	DR	L	13	20	11.31	14360	0.0787604	561.3	87.09	0.1552	147911	1.928	2.5	28	23	67.5	23.5
Dr_L04_B	DR	L	13	21	11.88	14360	0.0827298	556.1	86.96	0.1564	146542	1.928	2.5	28	23	67.5	23.5
Dr_L04_B	DR	L	13	22	12.46	14360	0.0867688	550	86.88	0.158	144936	1.928	2.5	28	23	67.5	23.5
Dr_L04_B	DR	L	13	23	13.02	14360	0.0906685	545.6	88.29	0.1618	143783	1.928	2.5	28	23	67.5	23.5
Dr_L04_B	DR	L	13	24	13.59	14360	0.0946379	541.7	89.61	0.1654	142746	1.928	2.5	28	23	67.5	23.5
Dr_L04_B	DR	L	13	25	14.16	14360	0.0986072	538.4	90.6	0.1683	141882	1.928	2.5	28	23	67.5	23.5
Dr_L04_B	DR	L	13	26	14.73	14360	0.102577	536	91.05	0.1699	141240	1.928	2.5	28	23	67.5	23.5
Dr_L04_B	DR	L	13	27	15.31	14360	0.106616	532.8	91.01	0.1708	140402	1.928	2.5	28	23	67.5	23.5
Dr_L04_B	DR	L	13	28	15.87	14360	0.110515	529.6	90.95	0.1717	139555	1.928	2.5	28	23	67.5	23.5
Dr_L04_B	DR	L	13	29	16.43	14360	0.114415	525.8	90.4	0.1719	138553	1.928	2.5	28	23	67.5	23.5
Dr_L04_B	DR	L	13	30	17	14360	0.118384	522.5	90.46	0.1731	137679	1.928	2.5	28	23	67.5	23.5
Dr_L07_A	DR	L	14	1	0.4998	14560	0.00343269	990.7	96.62	0.09752	191711	1.885	1.903	29	24	66.5	24.5
Dr_L07_A	DR	L	14	2	1.069	14560	0.00734203	949.5	101	0.1063	183737	1.885	1.903	29	24	66.5	24.5
Dr_L07_A	DR	L	14	3	1.637	14560	0.0112431	935.5	105.2	0.1125	181014	1.885	1.903	29	24	66.5	24.5
Dr_L07_A	DR	L	14	4	2.205	14560	0.0151442	927.5	98.99	0.1067	179475	1.885	1.903	29	24	66.5	24.5
Dr_L07_A	DR	L	14	5	2.778	14560	0.0190797	924.4	99.77	0.1079	178867	1.885	1.903	29	24	66.5	24.5
Dr_L07_A	DR	L	14	6	3.344	14560	0.022967	912.8	112.4	0.1231	176632	1.885	1.903	29	24	66.5	24.5
Dr_L07_A	DR	L	14	7	3.915	14560	0.0268887	902.6	103.9	0.1151	174650	1.885	1.903	29	24	66.5	24.5
Dr_L07_A	DR	L	14	8	4.482	14560	0.030783	894	114.6	0.1282	172985	1.885	1.903	29	24	66.5	24.5
Dr_L07_A	DR	L	14	9	5.052	14560	0.0346978	886.5	108.7	0.1226	171534	1.885	1.903	29	24	66.5	24.5
Dr_L07_A	DR	L	14	10	5.619	14560	0.038592	874.9	118.5	0.1354	169304	1.885	1.903	29	24	66.5	24.5
Dr_L07_A	DR	L	14	11	6.193	14560	0.0425343	873.3	116	0.1329	168979	1.885	1.903	29	24	66.5	24.5
Dr_L07_A	DR	L	14	12	6.757	14560	0.046408	861.6	113.7	0.132	166727	1.885	1.903	29	24	66.5	24.5
Dr_L07_A	DR	L	14	13	7.328	14560	0.0503297	852.6	120.8	0.1416	164977	1.885	1.903	29	24	66.5	24.5
Dr_L07_A	DR	L	14	14	7.901	14560	0.0542651	850.7	121.8	0.1431	164620	1.885	1.903	29	24	66.5	24.5
Dr_L07_A	DR	L	14	15	8.467	14560	0.0581525	843.3	120	0.1423	163177	1.885	1.903	29	24	66.5	24.5
Dr_L07_A	DR	L	14	16	9.034	14560	0.0620467	832.2	120.4	0.1446	161033	1.885	1.903	29	24	66.5	24.5
Dr_L07_A	DR	L	14	17	9.607	14560	0.0659821	825.7	124.2	0.1504	159774	1.885	1.903	29	24	66.5	24.5
Dr_L07_A	DR	L	14	18	10.18	14560	0.0699176	819.6	127.2	0.1552	158605	1.885	1.903	29	24	66.5	24.5
Dr_L07_A	DR	L	14	19	10.75	14560	0.0738324	814.3	129.7	0.1593	157567	1.885	1.903	29	24	66.5	24.5
Dr_L07_A	DR	L	14	20	11.31	14560	0.0776786	810	131.1	0.1619	156733	1.885	1.903	29	24	66.5	24.5
Dr_L07_A	DR	L	14	21	11.9	14560	0.0817308	804	132.1	0.1643	155576	1.885	1.903	29	24	66.5	24.5
Dr_L07_A	DR	L	14	22	12.45	14560	0.0855082	800.1	132.1	0.1651	154820	1.885	1.903	29	24	66.5	24.5
Dr_L07_A	DR	L	14	23	13.02	14560	0.0894231	794.1	132	0.1662	153668	1.885	1.903	29	24	66.5	24.5
Dr_L07_A	DR	L	14	24	13.59	14560	0.0933379	788	132.6	0.1683	152477	1.885	1.903	29	24	66.5	24.5
Dr_L07_A	DR	L	14	25	14.16	14560	0.0972527	782.1	133.9	0.1713	151344	1.885	1.903	29	24	66.5	24.5
Dr_L07_A	DR	L	14	26	14.73	14560	0.101168	777.6	137.2	0.1764	150472	1.885	1.903	29	24	66.5	24.5
Dr_L07_A	DR	L	14	27	15.3	14560	0.105082	772.4	138.2	0.1789	149469	1.885	1.903	29	24	66.5	24.5
Dr_L07_A	DR	L	14	28	15.87	14560	0.108997	769.1	139.9	0.1819	148830	1.885	1.903	29	24	66.5	24.5
Dr_L07_A	DR	L	14	29	16.43	14560	0.112843	766.3	140.8	0.1837	148281	1.885	1.903	29	24	66.5	24.5
Dr_L07_A	DR	L	14	30	17	14560	0.116758	762.6	141.5	0.1855	147565	1.885	1.903	29	24	66.5	24.5
Dr_L07_B	DR	L	14	1	0.5001	14480	0.00345373	1162	109.5	0.09424	210067	1.775	1.878	30	25	67	25
Dr_L07_B	DR	L	14	2	1.069	14480	0.0073826	1129	121.1	0.1073	204182	1.775	1.878	30	25	67	25
Dr_L07_B	DR	L	14	3	1.638	14480	0.0113122	1118	122.8	0.1099	202142	1.775	1.878	30	25	67	25
Dr_L07_B	DR	L	14	4	2.205	14480	0.0152279	1101	125.4	0.1138	199199	1.775	1.878	30	25	67	25
Dr_L07_B	DR	L	14	5	2.778	14480	0.0191851	1097	115.8	0.1056	198386	1.775	1.878	30	25	67	25
Dr_L07_B	DR	L	14	6	3.346	14480	0.0231077	1081	130.6	0.1208	195477	1.775	1.878	30	25	67	25
Dr_L07_B	DR	L	14	7	3.914	14480	0.0270304	1069	121	0.1132	193401	1.775	1.878	30	25	67	25
Dr_L07_B	DR	L	14	8	4.483	14480	0.0309599	1059	133.7	0.1262	191555	1.775	1.878	30	25	67	25
Dr_L07_B	DR	L	14	9	5.053	14480	0.0348964	1049	126.9	0.121	189759	1.775	1.878	30	25	67	25
Dr_L07_B	DR	L	14	10	5.62	14480	0.0388122	1037	137.1	0.1323	187514	1.775	1.878	30	25	67	25
Dr_L07_B	DR	L	14	11	6.191	14480	0.0427555	1034	135.5	0.1311	187049	1.775	1.878	30	25	67	25
Dr_L07_B	DR	L	14	12	6.757	14480	0.0466644	1019	133.7	0.1312	184306	1.775	1.878	30	25	67	25
Dr_L07_B	DR	L	14	13	7.328	14480	0.0506077	1008	142.8	0.1417	182314	1.775	1.878	30	25	67	25
Dr_L07_B	DR	L	14	14	7.88	14480	0.0544199	1005	146.5	0.1458	181680	1.775	1.878	30	25	67	25
Dr_L07_B	DR	L	14	15	8.468	14480	0.0584807	997.1	143.8	0.1442	180334	1.775	1.878	30	25	67	25
Dr_L07_B	DR	L	14	16	9.036	14480	0.0624033	984.9	142.9	0.1451	178127	1.775	1.878	30	25	67	25
Dr_L07_B	DR	L	14	17	9.606	14480	0.0663398	975.5	145.9	0.1495	176422	1.775	1.878	30	25	67	25
Dr_L07_B	DR	L	14	18	10.18	14480	0.0703039	967.1	149.5	0.1546	174900	1.775	1.878	30	25	67	25
Dr_L07_B	DR	L	14	19	10.75	14480	0.0742403	959.2	153.2	0.1597	173479	1.775	1.878	30	25	67	25
Dr_L07_B	DR	L	14	20	11.32	14480	0.0781768	953.2	155.9	0.1636	172388	1.775	1.878	30	25	67	25
Dr_L07_B	DR	L	14	21	11.89	14480	0.0821133	947.5	157.1	0.1659	171362	1.775	1.878	30	25	67	25
Dr_L07_B	DR	L	14	22	12.45	14480	0.0859807	941.5	158.6	0.1685	170281	1.775	1.878	30	25	67	25
Dr_L07_B	DR	L	14	23	13.02	14480	0.0899171	934.6	158.6	0.1697	169030	1.775	1.878	30	25	67	25
Dr_L07_B	DR	L	14	24	13.59	14480	0.0938536	927.2	158.8	0.1713	167681	1.775	1.878	30	25	67	25
Dr_L07_B	DR	L	14	25	14.16	14480	0.0977901	919.4	160	0.174	166270	1.775	1.878	30	25	67	25
Dr_L07_B	DR	L	14	26	14.73	14480	0.101727	911.2	164.6	0.1806	164801	1.775	1.878	30	25	67	25
Dr_L07_B	DR	L	14	27	15.3	14480	0.105663	904	164.1	0.1815	163493	1.775	1.878	30	25	67	25
Dr_L07_B	DR	L	14	28	15.87	14480	0.109599	898.3	166.5	0.1854	162464	1.775	1.878	30	25	67	25
Dr_L07_B	DR	L	14	29	16.44	14480	0.113536	893.4	168.4	0.1885	161580	1.775	1.878	30	25	67	25
Dr_L07_B	DR	L	14	30	17	14480	0.117403	889	169.3	0.1905	160780	1.775	1.878	30	25	67	25
Dr_L09_A	DR	L	15	1	0.4999	14200	0.00352042	628.4	61.07	0.09718	118830	1.618	2.113	26	21	53	21
Dr_L09_A	DR	L	15	2	1.068	14200	0.00752113	628	63.28	0.1008	118754	1.618	2.113	26	21	53	21
Dr_L09_A	DR	L	15	3	1.636	14200	0.0115211	624.1	61.14	0.09797	118009	1.618	2.113	26	21	53	21
Dr_L09_A	DR	L	15	4	2.21	14200	0.0155634	623.6	66.54	0.1067	117918	1.618	2.113	26	21	53	21
Dr_L09_A	DR	L	15	5	2.774	14200	0.0195352	610.9	72.35	0.1184	115508	1.618	2.113	26	21	53	21
Dr_L09_A	DR	L	15	6	3.344	14200	0.0235493	608.3	66.5	0.1093	115030	1.618	2.113	26	21	53	21
Dr_L09_A	DR	L	15	7	3.915	14200	0.0275704	606.1	73.97	0.1221	114602	1.618	2.113	26	21	53	21
Dr_L09_A	DR	L	15	8	4.48	14200	0.0315493	598.4	70.28	0.1174	113150	1.618	2.113	26	21	53	21
Dr_L09_A	DR	L	15	9	5.053	14200	0.0355845	596.5	75.96	0.1273	112792	1.618	2.113	26	21	53	21
Dr_L09_A	DR	L	15	10	5.617	14200	0.0395563	592.6	71.99	0.1215	112061	1.618	2.113	26	21	53	21
Dr_L09_A	DR	L	15	11	6.188	14200	0.0435775	587.6	77.42	0.1318	111108	1.618	2.113	26	21	53	21
Dr_L09_A	DR	L	15	12	6.759	14200	0.0475986	586.8	75.61	0.1288	110966	1.618	2.113	26	21	53	21
Dr_L09_A	DR	L	15	13	7.333	14200	0.0516408	579.3	76.61	0.1323	109535	1.618	2.113	26	21	53	21
Dr_L09_A	DR	L	15	14	7.897	14200	0.0556127	577.5	80.47	0.1393	109206	1.618	2.113	26	21	53	21
Dr_L09_A	DR	L	15	15	8.463	14200	0.0595986	576.9	80.49	0.1395	109094	1.618	2.113	26	21	53	21
Dr_L09_A	DR	L	15	16	9.033	14200	0.0636127	573.9	79.12	0.1379	108515	1.618	2.113	26	21	53	21
Dr_L09_A	DR	L	15	17	9.603	14200	0.0676268	569.6	79.77	0.1401	107699	1.618	2.113	26	21	53	21
Dr_L09_A	DR	L	15	18	10.17	14200	0.0716197	565.8	81.2	0.1435	106987	1.618	2.113	26	21	53	21
Dr_L09_A	DR	L	15	19	10.74	14200	0.0756338	562.7	83.04	0.1476	106394	1.618	2.113	26	21	53	21
Dr_L09_A	DR	L	15	20	11.31	14200	0.0796479	560.2	85.08	0.1519	105934	1.618	2.113	26	21	53	21
Dr_L09_A	DR	L	15	21	11.88	14200	0.083662	558.7	86.78	0.1553	105638	1.618	2.113	26	21	53	21
Dr_L09_A	DR	L	15	22	12.44	14200	0.0876056	557.1	87.94	0.1579	105348	1.618	2.113	26	21	53	21
Dr_L09_A	DR	L	15	23	13.01	14200	0.0916197	555.7	88.36	0.159	105075	1.618	2.113	26	21	53	21
Dr_L09_A	DR	L	15	24	13.58	14200	0.0956338	553.6	88.48	0.1598	104673	1.618	2.113	26	21	53	21
Dr_L09_A	DR	L	15	25	14.15	14200	0.0996479	551.2	88.79	0.1611	104227	1.618	2.113	26	21	53	21
Dr_L09_A	DR	L	15	26	14.72	14200	0.103662	548.2	89.5	0.1633	103669	1.618	2.113	26	21	53	21
Dr_L09_A	DR	L	15	27	15.29	14200	0.107676	545.7	90.81	0.1664	103188	1.618	2.113	26	21	53	21
Dr_L09_A	DR	L	15	28	15.86	14200	0.11169	543.3	92.34	0.17	102739	1.618	2.113	26	21	53	21
Dr_L09_A	DR	L	15	29	16.43	14200	0.115704	541.8	94.09	0.1737	102442	1.618	2.113	26	21	53	21
Dr_L09_A	DR	L	15	30	17	14200	0.119718	540.3	95.56	0.1769	102164	1.618	2.113	26	21	53	21
Dr_L09_B	DR	L	15	1	0.4999	12110	0.00412799	319.5	37.59	0.1176	53980	1.563	1.668	27	22	32.5	22
Dr_L09_B	DR	L	15	2	1.074	12110	0.0088687	317.2	39.49	0.1245	53590	1.563	1.668	27	22	32.5	22
Dr_L09_B	DR	L	15	3	1.638	12110	0.013526	307.3	42.64	0.1387	51925	1.563	1.668	27	22	32.5	22
Dr_L09_B	DR	L	15	4	2.204	12110	0.0181998	300.9	39.43	0.131	50834	1.563	1.668	27	22	32.5	22
Dr_L09_B	DR	L	15	5	2.78	12110	0.0229562	300.6	40.1	0.1334	50792	1.563	1.668	27	22	32.5	22
Dr_L09_B	DR	L	15	6	3.341	12110	0.0275888	292.6	40.28	0.1377	49433	1.563	1.668	27	22	32.5	22
Dr_L09_B	DR	L	15	7	3.918	12110	0.0323534	292	42.95	0.1471	49332	1.563	1.668	27	22	32.5	22
Dr_L09_B	DR	L	15	8	4.489	12110	0.0370685	289.5	39.78	0.1374	48915	1.563	1.668	27	22	32.5	22
Dr_L09_B	DR	L	15	9	5.048	12110	0.0416846	283.4	41.98	0.1481	47877	1.563	1.668	27	22	32.5	22
Dr_L09_B	DR	L	15	10	5.622	12110	0.0464244	283.2	42.76	0.151	47853	1.563	1.668	27	22	32.5	22
Dr_L09_B	DR	L	15	11	6.194	12110	0.0511478	280.7	41.11	0.1465	47419	1.563	1.668	27	22	32.5	22
Dr_L09_B	DR	L	15	12	6.758	12110	0.0558051	277	40.65	0.1467	46801	1.563	1.668	27	22	32.5	22
Dr_L09_B	DR	L	15	13	7.326	12110	0.0604955	274	42.73	0.1559	46299	1.563	1.668	27	22	32.5	22
Dr_L09_B	DR	L	15	14	7.898	12110	0.0652188	273.3	42.76	0.1564	46181	1.563	1.668	27	22	32.5	22
Dr_L09_B	DR	L	15	15	8.466	12110	0.0699092	271.6	41.85	0.1541	45885	1.563	1.668	27	22	32.5	22
Dr_L09_B	DR	L	15	16	9.032	12110	0.074583	268.6	41.79	0.1556	45376	1.563	1.668	27	22	32.5	22
Dr_L09_B	DR	L	15	17	9.606	12110	0.0793229	266.5	42.52	0.1595	45032	1.563	1.668	27	22	32.5	22
Dr_L09_B	DR	L	15	18	10.17	12110	0.0839802	265.4	43.2	0.1628	44840	1.563	1.668	27	22	32.5	22
Dr_L09_B	DR	L	15	19	10.74	12110	0.088687	264.6	43.85	0.1657	44698	1.563	1.668	27	22	32.5	22
Dr_L09_B	DR	L	15	20	11.31	12110	0.0933939	264	44.05	0.1668	44609	1.563	1.668	27	22	32.5	22
Dr_L09_B	DR	L	15	21	11.88	12110	0.0981007	263.5	44.14	0.1675	44520	1.563	1.668	27	22	32.5	22
Dr_L09_B	DR	L	15	22	12.44	12110	0.102725	263	44.07	0.1676	44439	1.563	1.668	27	22	32.5	22
Dr_L09_B	DR	L	15	23	13.01	12110	0.107432	262.2	43.95	0.1676	44298	1.563	1.668	27	22	32.5	22
Dr_L09_B	DR	L	15	24	13.58	12110	0.112139	261.3	44.13	0.1689	44138	1.563	1.668	27	22	32.5	22
Dr_L09_B	DR	L	15	25	14.15	12110	0.116846	260.4	44.5	0.1709	43998	1.563	1.668	27	22	32.5	22
Dr_L09_B	DR	L	15	26	14.72	12110	0.121552	260	45.04	0.1733	43919	1.563	1.668	27	22	32.5	22
Dr_L09_B	DR	L	15	27	15.29	12110	0.126259	259.8	45.67	0.1758	43886	1.563	1.668	27	22	32.5	22
Dr_L09_B	DR	L	15	28	15.85	12110	0.130884	260	46.28	0.178	43932	1.563	1.668	27	22	32.5	22
Dr_L09_B	DR	L	15	29	16.42	12110	0.13559	260.5	46.6	0.1789	44012	1.563	1.668	27	22	32.5	22
Dr_L09_B	DR	L	15	30	16.98	12110	0.140215	261.1	46.81	0.1793	44106	1.563	1.668	27	22	32.5	22
Dr_L10_A	DR	L	16	1	0.4999	14610	0.00342163	706.9	62.02	0.08774	174834	1.673	2.75	31	26	68	26
Dr_L10_A	DR	L	16	2	1.069	14610	0.00731691	705.6	71.84	0.1018	174533	1.673	2.75	31	26	68	26
Dr_L10_A	DR	L	16	3	1.636	14610	0.0111978	696.5	72.56	0.1042	172282	1.673	2.75	31	26	68	26
Dr_L10_A	DR	L	16	4	2.205	14610	0.0150924	686.6	68.5	0.09977	169817	1.673	2.75	31	26	68	26
Dr_L10_A	DR	L	16	5	2.776	14610	0.0190007	684.3	70.24	0.1026	169257	1.673	2.75	31	26	68	26
Dr_L10_A	DR	L	16	6	3.344	14610	0.0228884	673.7	79.28	0.1177	166638	1.673	2.75	31	26	68	26
Dr_L10_A	DR	L	16	7	3.912	14610	0.0267762	665.7	73.12	0.1098	164664	1.673	2.75	31	26	68	26
Dr_L10_A	DR	L	16	8	4.481	14610	0.0306708	660.9	80.75	0.1222	163464	1.673	2.75	31	26	68	26
Dr_L10_A	DR	L	16	9	5.05	14610	0.0345654	656.3	76.36	0.1164	162333	1.673	2.75	31	26	68	26
Dr_L10_A	DR	L	16	10	5.618	14610	0.0384531	650.3	82.08	0.1262	160850	1.673	2.75	31	26	68	26
Dr_L10_A	DR	L	16	11	6.191	14610	0.0423751	648.6	81.51	0.1257	160417	1.673	2.75	31	26	68	26
Dr_L10_A	DR	L	16	12	6.756	14610	0.0462423	641.3	79.57	0.1241	158620	1.673	2.75	31	26	68	26
Dr_L10_A	DR	L	16	13	7.325	14610	0.0501369	635.6	84.42	0.1328	157210	1.673	2.75	31	26	68	26
Dr_L10_A	DR	L	16	14	7.898	14610	0.0540589	635.2	85.4	0.1345	157109	1.673	2.75	31	26	68	26
Dr_L10_A	DR	L	16	15	8.467	14610	0.0579535	630.8	83.88	0.133	156014	1.673	2.75	31	26	68	26
Dr_L10_A	DR	L	16	16	9.035	14610	0.0618412	624.2	84.44	0.1353	154393	1.673	2.75	31	26	68	26
Dr_L10_A	DR	L	16	17	9.602	14610	0.0657221	620.2	86.73	0.1398	153389	1.673	2.75	31	26	68	26
Dr_L10_A	DR	L	16	18	10.17	14610	0.0696099	616.4	88.92	0.1442	152472	1.673	2.75	31	26	68	26
Dr_L10_A	DR	L	16	19	10.74	14610	0.0735113	615.1	91.28	0.1484	152138	1.673	2.75	31	26	68	26
Dr_L10_A	DR	L	16	20	11.31	14610	0.0774127	610.8	92.58	0.1516	151080	1.673	2.75	31	26	68	26
Dr_L10_A	DR	L	16	21	11.88	14610	0.0813142	608.4	92.75	0.1525	150474	1.673	2.75	31	26	68	26
Dr_L10_A	DR	L	16	22	12.45	14610	0.0852156	605.6	92.69	0.1531	149785	1.673	2.75	31	26	68	26
Dr_L10_A	DR	L	16	23	13.02	14610	0.089117	601.9	92.51	0.1537	148875	1.673	2.75	31	26	68	26
Dr_L10_A	DR	L	16	24	13.58	14610	0.09295	597.7	92.78	0.1552	147839	1.673	2.75	31	26	68	26
Dr_L10_A	DR	L	16	25	14.16	14610	0.0969199	594	93.69	0.1577	146915	1.673	2.75	31	26	68	26
Dr_L10_A	DR	L	16	26	14.73	14610	0.100821	590.5	94.93	0.1608	146046	1.673	2.75	31	26	68	26
Dr_L10_A	DR	L	16	27	15.3	14610	0.104723	587.5	96.43	0.1641	145322	1.673	2.75	31	26	68	26
Dr_L10_A	DR	L	16	28	15.87	14610	0.108624	585.1	97.76	0.1671	144715	1.673	2.75	31	26	68	26
Dr_L10_A	DR	L	16	29	16.43	14610	0.112457	583.1	98.4	0.1687	144229	1.673	2.75	31	26	68	26
Dr_L10_A	DR	L	16	30	17	14610	0.116359	581.1	99.11	0.1706	143720	1.673	2.75	31	26	68	26
Dr_L10_B	DR	L	16	1	0.5001	13790	0.00362654	1162	117.8	0.1014	238857	1.935	1.865	27	22	77	22
Dr_L10_B	DR	L	16	2	1.068	13790	0.00774474	1106	123.6	0.1118	227312	1.935	1.865	27	22	77	22
Dr_L10_B	DR	L	16	3	1.635	13790	0.0118564	1088	125.1	0.1149	223782	1.935	1.865	27	22	77	22
Dr_L10_B	DR	L	16	4	2.205	13790	0.0159898	1080	122.1	0.113	222120	1.935	1.865	27	22	77	22
Dr_L10_B	DR	L	16	5	2.776	13790	0.0201305	1074	127.9	0.1191	220727	1.935	1.865	27	22	77	22
Dr_L10_B	DR	L	16	6	3.344	13790	0.0242495	1049	141.1	0.1345	215735	1.935	1.865	27	22	77	22
Dr_L10_B	DR	L	16	7	3.912	13790	0.0283684	1033	133.8	0.1296	212378	1.935	1.865	27	22	77	22
Dr_L10_B	DR	L	16	8	4.485	13790	0.0325236	1021	149.1	0.1461	209860	1.935	1.865	27	22	77	22
Dr_L10_B	DR	L	16	9	5.053	13790	0.0366425	1006	143.2	0.1424	206826	1.935	1.865	27	22	77	22
Dr_L10_B	DR	L	16	10	5.621	13790	0.0407614	987.6	156.1	0.158	203063	1.935	1.865	27	22	77	22
Dr_L10_B	DR	L	16	11	6.191	13790	0.0448949	975.8	151.5	0.1552	200620	1.935	1.865	27	22	77	22
Dr_L10_B	DR	L	16	12	6.758	13790	0.0490065	956.6	156.5	0.1636	196688	1.935	1.865	27	22	77	22
Dr_L10_B	DR	L	16	13	7.331	13790	0.0531617	945.6	164.1	0.1735	194413	1.935	1.865	27	22	77	22
Dr_L10_B	DR	L	16	14	7.899	13790	0.0572806	937	160.8	0.1716	192650	1.935	1.865	27	22	77	22
Dr_L10_B	DR	L	16	15	8.469	13790	0.0614141	922.7	158.3	0.1715	189716	1.935	1.865	27	22	77	22
Dr_L10_B	DR	L	16	16	9.036	13790	0.0655257	907.9	162.5	0.179	186671	1.935	1.865	27	22	77	22
Dr_L10_B	DR	L	16	17	9.61	13790	0.0696882	899.9	164.6	0.1829	185018	1.935	1.865	27	22	77	22
Dr_L10_B	DR	L	16	18	10.18	13790	0.0738216	891	165.5	0.1858	183185	1.935	1.865	27	22	77	22
Dr_L10_B	DR	L	16	19	10.75	13790	0.077955	881.4	166.2	0.1885	181219	1.935	1.865	27	22	77	22
Dr_L10_B	DR	L	16	20	11.31	13790	0.082016	873.8	164.8	0.1885	179660	1.935	1.865	27	22	77	22
Dr_L10_B	DR	L	16	21	11.88	13790	0.0861494	865.4	163.4	0.1888	177927	1.935	1.865	27	22	77	22
Dr_L10_B	DR	L	16	22	12.45	13790	0.0902828	855.7	162.4	0.1897	175944	1.935	1.865	27	22	77	22
Dr_L10_B	DR	L	16	23	13.02	13790	0.0944162	847.2	162.7	0.192	174191	1.935	1.865	27	22	77	22
Dr_L10_B	DR	L	16	24	13.6	13790	0.0986222	839.3	163.5	0.1947	172573	1.935	1.865	27	22	77	22
Dr_L10_B	DR	L	16	25	14.16	13790	0.102683	831.3	164.9	0.1984	170911	1.935	1.865	27	22	77	22
Dr_L10_B	DR	L	16	26	14.73	13790	0.106817	825.5	166	0.201	169735	1.935	1.865	27	22	77	22
Dr_L10_B	DR	L	16	27	15.3	13790	0.11095	821	166.3	0.2025	168809	1.935	1.865	27	22	77	22
Dr_L10_B	DR	L	16	28	15.86	13790	0.115011	816.4	165.9	0.2032	167850	1.935	1.865	27	22	77	22
Dr_L10_B	DR	L	16	29	16.43	13790	0.119144	811.1	165.1	0.2035	166774	1.935	1.865	27	22	77	22
Dr_L10_B	DR	L	16	30	17	13790	0.123278	805.6	164.1	0.2038	165628	1.935	1.865	27	22	77	22
Dr_L13_A	DR	L	17	1	0.4999	13030	0.00383653	589.3	53.72	0.09116	174273	1.723	2.848	29	24	66.5	24
Dr_L13_A	DR	L	17	2	1.069	13030	0.00820414	584.6	58.29	0.09971	172893	1.723	2.848	29	24	66.5	24
Dr_L13_A	DR	L	17	3	1.639	13030	0.0125787	573	60.48	0.1055	169453	1.723	2.848	29	24	66.5	24
Dr_L13_A	DR	L	17	4	2.205	13030	0.0169225	566.8	56.2	0.09916	167609	1.723	2.848	29	24	66.5	24
Dr_L13_A	DR	L	17	5	2.778	13030	0.02132	566.1	56.78	0.1003	167407	1.723	2.848	29	24	66.5	24
Dr_L13_A	DR	L	17	6	3.345	13030	0.0256715	558.4	64.41	0.1153	165146	1.723	2.848	29	24	66.5	24
Dr_L13_A	DR	L	17	7	3.914	13030	0.0300384	552.9	59.79	0.1081	163504	1.723	2.848	29	24	66.5	24
Dr_L13_A	DR	L	17	8	4.482	13030	0.0343975	548.1	66.34	0.121	162084	1.723	2.848	29	24	66.5	24
Dr_L13_A	DR	L	17	9	5.051	13030	0.0387644	543.8	62.62	0.1152	160811	1.723	2.848	29	24	66.5	24
Dr_L13_A	DR	L	17	10	5.619	13030	0.0431236	539.1	68.32	0.1267	159418	1.723	2.848	29	24	66.5	24
Dr_L13_A	DR	L	17	11	6.191	13030	0.0475134	537	67.09	0.1249	158796	1.723	2.848	29	24	66.5	24
Dr_L13_A	DR	L	17	12	6.757	13030	0.0518573	529.8	69.13	0.1305	156677	1.723	2.848	29	24	66.5	24
Dr_L13_A	DR	L	17	13	7.327	13030	0.0562318	526.9	73.8	0.1401	155805	1.723	2.848	29	24	66.5	24
Dr_L13_A	DR	L	17	14	7.902	13030	0.0606447	524.4	74.27	0.1416	155076	1.723	2.848	29	24	66.5	24
Dr_L13_A	DR	L	17	15	8.466	13030	0.0649731	520	73.53	0.1414	153772	1.723	2.848	29	24	66.5	24
Dr_L13_A	DR	L	17	16	9.032	13030	0.069317	513.7	74.62	0.1452	151926	1.723	2.848	29	24	66.5	24
Dr_L13_A	DR	L	17	17	9.606	13030	0.0737222	509.6	76.71	0.1505	150700	1.723	2.848	29	24	66.5	24
Dr_L13_A	DR	L	17	18	10.18	13030	0.0781274	506.3	78.65	0.1554	149717	1.723	2.848	29	24	66.5	24
Dr_L13_A	DR	L	17	19	10.74	13030	0.0824252	503.4	80.23	0.1594	148861	1.723	2.848	29	24	66.5	24
Dr_L13_A	DR	L	17	20	11.31	13030	0.0867997	500.8	81.04	0.1618	148112	1.723	2.848	29	24	66.5	24
Dr_L13_A	DR	L	17	21	11.88	13030	0.0911742	498.4	81.41	0.1633	147382	1.723	2.848	29	24	66.5	24
Dr_L13_A	DR	L	17	22	12.45	13030	0.0955487	495.6	81.58	0.1646	146575	1.723	2.848	29	24	66.5	24
Dr_L13_A	DR	L	17	23	13.02	13030	0.0999233	492.4	81.52	0.1656	145603	1.723	2.848	29	24	66.5	24
Dr_L13_A	DR	L	17	24	13.58	13030	0.104221	489	81.88	0.1674	144601	1.723	2.848	29	24	66.5	24
Dr_L13_A	DR	L	17	25	14.16	13030	0.108672	485.6	82.67	0.1702	143596	1.723	2.848	29	24	66.5	24
Dr_L13_A	DR	L	17	26	14.73	13030	0.113047	482.7	83.74	0.1735	142761	1.723	2.848	29	24	66.5	24
Dr_L13_A	DR	L	17	27	15.3	13030	0.117421	480.1	84.96	0.177	141986	1.723	2.848	29	24	66.5	24
Dr_L13_A	DR	L	17	28	15.86	13030	0.121719	478	86.17	0.1803	141366	1.723	2.848	29	24	66.5	24
Dr_L13_A	DR	L	17	29	16.43	13030	0.126094	476.3	86.66	0.1819	140867	1.723	2.848	29	24	66.5	24
Dr_L13_A	DR	L	17	30	17	13030	0.130468	474.6	86.85	0.183	140355	1.723	2.848	29	24	66.5	24
Dr_L13_B	DR	L	17	1	0.5	13810	0.00362057	914.7	99.37	0.1086	185242	1.898	1.878	30	25	66.5	25
Dr_L13_B	DR	L	17	2	1.07	13810	0.00774801	914.3	114.6	0.1253	185146	1.898	1.878	30	25	66.5	25
Dr_L13_B	DR	L	17	3	1.637	13810	0.0118537	900.7	116.2	0.129	182406	1.898	1.878	30	25	66.5	25
Dr_L13_B	DR	L	17	4	2.205	13810	0.0159667	884.3	108.9	0.1231	179085	1.898	1.878	30	25	66.5	25
Dr_L13_B	DR	L	17	5	2.777	13810	0.0201086	880.7	111.4	0.1264	178350	1.898	1.878	30	25	66.5	25
Dr_L13_B	DR	L	17	6	3.346	13810	0.0242288	861.8	125	0.1451	174527	1.898	1.878	30	25	66.5	25
Dr_L13_B	DR	L	17	7	3.913	13810	0.0283345	849.2	119.1	0.1403	171963	1.898	1.878	30	25	66.5	25
Dr_L13_B	DR	L	17	8	4.484	13810	0.0324692	835.7	131	0.1568	169229	1.898	1.878	30	25	66.5	25
Dr_L13_B	DR	L	17	9	5.055	13810	0.0366039	827.6	126.1	0.1524	167600	1.898	1.878	30	25	66.5	25
Dr_L13_B	DR	L	17	10	5.619	13810	0.0406879	812.8	134.2	0.1651	164601	1.898	1.878	30	25	66.5	25
Dr_L13_B	DR	L	17	11	6.191	13810	0.0448298	807.3	131	0.1622	163492	1.898	1.878	30	25	66.5	25
Dr_L13_B	DR	L	17	12	6.759	13810	0.0489428	792.7	132.7	0.1674	160533	1.898	1.878	30	25	66.5	25
Dr_L13_B	DR	L	17	13	7.33	13810	0.0530775	785.8	138.1	0.1758	159128	1.898	1.878	30	25	66.5	25
Dr_L13_B	DR	L	17	14	7.9	13810	0.0572049	780	137.6	0.1764	157953	1.898	1.878	30	25	66.5	25
Dr_L13_B	DR	L	17	15	8.47	13810	0.0613324	770.6	135.5	0.1758	156046	1.898	1.878	30	25	66.5	25
Dr_L13_B	DR	L	17	16	9.037	13810	0.0654381	758.7	136.3	0.1797	153640	1.898	1.878	30	25	66.5	25
Dr_L13_B	DR	L	17	17	9.608	13810	0.0695728	750	138.8	0.1851	151878	1.898	1.878	30	25	66.5	25
Dr_L13_B	DR	L	17	18	10.18	13810	0.0737147	742.6	141.2	0.1901	150390	1.898	1.878	30	25	66.5	25
Dr_L13_B	DR	L	17	19	10.75	13810	0.0778421	736.7	143	0.1941	149185	1.898	1.878	30	25	66.5	25
Dr_L13_B	DR	L	17	20	11.32	13810	0.0819696	731.3	143.7	0.1965	148089	1.898	1.878	30	25	66.5	25
Dr_L13_B	DR	L	17	21	11.89	13810	0.086097	725	144.2	0.1989	146817	1.898	1.878	30	25	66.5	25
Dr_L13_B	DR	L	17	22	12.45	13810	0.0901521	718.6	143.6	0.1998	145514	1.898	1.878	30	25	66.5	25
Dr_L13_B	DR	L	17	23	13.02	13810	0.0942795	711.8	143	0.2009	144144	1.898	1.878	30	25	66.5	25
Dr_L13_B	DR	L	17	24	13.59	13810	0.098407	704.9	143.2	0.2032	142741	1.898	1.878	30	25	66.5	25
Dr_L13_B	DR	L	17	25	14.16	13810	0.102534	698.4	143.9	0.2061	141439	1.898	1.878	30	25	66.5	25
Dr_L13_B	DR	L	17	26	14.73	13810	0.106662	693	145.3	0.2097	140328	1.898	1.878	30	25	66.5	25
Dr_L13_B	DR	L	17	27	15.3	13810	0.110789	688.2	146.8	0.2133	139375	1.898	1.878	30	25	66.5	25
Dr_L13_B	DR	L	17	28	15.87	13810	0.114917	684.5	147.9	0.216	138612	1.898	1.878	30	25	66.5	25
Dr_L13_B	DR	L	17	29	16.43	13810	0.118972	681.1	148.4	0.2179	137935	1.898	1.878	30	25	66.5	25
Dr_L13_B	DR	L	17	30	17	13810	0.123099	677.8	148.6	0.2193	137261	1.898	1.878	30	25	66.5	25
Dr_L15_B	DR	L	18	1	0.4999	13270	0.00376714	896.2	90.73	0.1012	276956	2.295	2.275	26	21	83	21
Dr_L15_B	DR	L	18	2	1.068	13270	0.00804823	895.2	100.1	0.1118	276636	2.295	2.275	26	21	83	21
Dr_L15_B	DR	L	18	3	1.637	13270	0.0123361	883.2	105.6	0.1196	272922	2.295	2.275	26	21	83	21
Dr_L15_B	DR	L	18	4	2.205	13270	0.0166164	861.7	97.91	0.1136	266274	2.295	2.275	26	21	83	21
Dr_L15_B	DR	L	18	5	2.776	13270	0.0209194	857.8	99.03	0.1154	265079	2.295	2.275	26	21	83	21
Dr_L15_B	DR	L	18	6	3.344	13270	0.0251997	841.9	110.9	0.1318	260165	2.295	2.275	26	21	83	21
Dr_L15_B	DR	L	18	7	3.915	13270	0.0295026	828.6	101	0.1219	256055	2.295	2.275	26	21	83	21
Dr_L15_B	DR	L	18	8	4.485	13270	0.033798	817.7	113.5	0.1388	252681	2.295	2.275	26	21	83	21
Dr_L15_B	DR	L	18	9	5.053	13270	0.0380784	808.4	107.9	0.1335	249818	2.295	2.275	26	21	83	21
Dr_L15_B	DR	L	18	10	5.622	13270	0.0423662	796.8	114.7	0.144	246218	2.295	2.275	26	21	83	21
Dr_L15_B	DR	L	18	11	6.194	13270	0.0466767	790.9	110.9	0.1402	244418	2.295	2.275	26	21	83	21
Dr_L15_B	DR	L	18	12	6.759	13270	0.0509344	776.3	111.9	0.1442	239906	2.295	2.275	26	21	83	21
Dr_L15_B	DR	L	18	13	7.333	13270	0.05526	769.7	117.9	0.1531	237863	2.295	2.275	26	21	83	21
Dr_L15_B	DR	L	18	14	7.903	13270	0.0595554	763.6	116.6	0.1527	235982	2.295	2.275	26	21	83	21
Dr_L15_B	DR	L	18	15	8.469	13270	0.0638206	754.1	114	0.1511	233034	2.295	2.275	26	21	83	21
Dr_L15_B	DR	L	18	16	9.038	13270	0.0681085	743	114.7	0.1543	229618	2.295	2.275	26	21	83	21
Dr_L15_B	DR	L	18	17	9.612	13270	0.0724341	734.9	116.9	0.1591	227116	2.295	2.275	26	21	83	21
Dr_L15_B	DR	L	18	18	10.18	13270	0.0767144	728.3	118.8	0.1631	225059	2.295	2.275	26	21	83	21
Dr_L15_B	DR	L	18	19	10.76	13270	0.0810852	720.6	121.3	0.1683	222678	2.295	2.275	26	21	83	21
Dr_L15_B	DR	L	18	20	11.32	13270	0.0853052	715.3	121.1	0.1693	221032	2.295	2.275	26	21	83	21
Dr_L15_B	DR	L	18	21	11.88	13270	0.0895252	709.6	120.7	0.1702	219274	2.295	2.275	26	21	83	21
Dr_L15_B	DR	L	18	22	12.45	13270	0.0938206	703	120.1	0.1708	217251	2.295	2.275	26	21	83	21
Dr_L15_B	DR	L	18	23	13.02	13270	0.0981161	696.2	119.4	0.1715	215150	2.295	2.275	26	21	83	21
Dr_L15_B	DR	L	18	24	13.59	13270	0.102411	688.4	121.9	0.177	212735	2.295	2.275	26	21	83	21
Dr_L15_B	DR	L	18	25	14.17	13270	0.106782	682.3	120.3	0.1763	210848	2.295	2.275	26	21	83	21
Dr_L15_B	DR	L	18	26	14.74	13270	0.111078	676.8	121.4	0.1795	209136	2.295	2.275	26	21	83	21
Dr_L15_B	DR	L	18	27	15.31	13270	0.115373	671.6	122.6	0.1826	207526	2.295	2.275	26	21	83	21
Dr_L15_B	DR	L	18	28	15.87	13270	0.119593	667.1	123.3	0.1849	206160	2.295	2.275	26	21	83	21
Dr_L15_B	DR	L	18	29	16.44	13270	0.123888	662.8	123.4	0.1862	204835	2.295	2.275	26	21	83	21
Dr_L15_B	DR	L	18	30	17.01	13270	0.128184	658.5	123.5	0.1875	203490	2.295	2.275	26	21	83	21
Dr_P04_B	DR	P	19	1	0.4999	13820	0.00361722	915	87.65	0.09579	178351	1.798	1.908	31	26	71.5	26
Dr_P04_B	DR	P	19	2	1.068	13820	0.00772793	925.5	88.34	0.09545	180404	1.798	1.908	31	26	71.5	26
Dr_P04_B	DR	P	19	3	1.637	13820	0.0118452	917.2	88.03	0.09598	178776	1.798	1.908	31	26	71.5	26
Dr_P04_B	DR	P	19	4	2.209	13820	0.0159841	907.4	94.02	0.1036	176881	1.798	1.908	31	26	71.5	26
Dr_P04_B	DR	P	19	5	2.775	13820	0.0200796	891.8	104.4	0.117	173832	1.798	1.908	31	26	71.5	26
Dr_P04_B	DR	P	19	6	3.343	13820	0.0241896	882.2	96.15	0.109	171965	1.798	1.908	31	26	71.5	26
Dr_P04_B	DR	P	19	7	3.917	13820	0.028343	878.4	106.3	0.121	171213	1.798	1.908	31	26	71.5	26
Dr_P04_B	DR	P	19	8	4.481	13820	0.032424	863.1	102.7	0.119	168247	1.798	1.908	31	26	71.5	26
Dr_P04_B	DR	P	19	9	5.055	13820	0.0365774	859.8	109.8	0.1277	167592	1.798	1.908	31	26	71.5	26
Dr_P04_B	DR	P	19	10	5.62	13820	0.0406657	849.2	104.5	0.1231	165524	1.798	1.908	31	26	71.5	26
Dr_P04_B	DR	P	19	11	6.188	13820	0.0447757	839.8	114.1	0.1358	163690	1.798	1.908	31	26	71.5	26
Dr_P04_B	DR	P	19	12	6.761	13820	0.0489219	837.4	110.2	0.1317	163225	1.798	1.908	31	26	71.5	26
Dr_P04_B	DR	P	19	13	7.327	13820	0.0530174	825.5	111.5	0.135	160917	1.798	1.908	31	26	71.5	26
Dr_P04_B	DR	P	19	14	7.898	13820	0.0571491	821.2	117.4	0.143	160063	1.798	1.908	31	26	71.5	26
Dr_P04_B	DR	P	19	15	8.467	13820	0.0612663	817.5	117.5	0.1437	159353	1.798	1.908	31	26	71.5	26
Dr_P04_B	DR	P	19	16	9.037	13820	0.0653907	810.8	116.2	0.1433	158047	1.798	1.908	31	26	71.5	26
Dr_P04_B	DR	P	19	17	9.604	13820	0.0694935	802.9	117.4	0.1462	156505	1.798	1.908	31	26	71.5	26
Dr_P04_B	DR	P	19	18	10.18	13820	0.0736614	794.9	120.7	0.1519	154947	1.798	1.908	31	26	71.5	26
Dr_P04_B	DR	P	19	19	10.75	13820	0.0777858	789.5	123.6	0.1566	153886	1.798	1.908	31	26	71.5	26
Dr_P04_B	DR	P	19	20	11.31	13820	0.0818379	785.2	125.9	0.1604	153045	1.798	1.908	31	26	71.5	26
Dr_P04_B	DR	P	19	21	11.88	13820	0.0859624	781.6	127.2	0.1627	152359	1.798	1.908	31	26	71.5	26
Dr_P04_B	DR	P	19	22	12.45	13820	0.0900868	777.7	127.7	0.1643	151596	1.798	1.908	31	26	71.5	26
Dr_P04_B	DR	P	19	23	13.03	13820	0.0942836	772.6	128.5	0.1664	150589	1.798	1.908	31	26	71.5	26
Dr_P04_B	DR	P	19	24	13.59	13820	0.0983357	768	127.9	0.1666	149695	1.798	1.908	31	26	71.5	26
Dr_P04_B	DR	P	19	25	14.16	13820	0.10246	762.6	129	0.1692	148657	1.798	1.908	31	26	71.5	26
Dr_P04_B	DR	P	19	26	14.73	13820	0.106585	757.5	130.6	0.1725	147659	1.798	1.908	31	26	71.5	26
Dr_P04_B	DR	P	19	27	15.3	13820	0.110709	753.3	132.8	0.1763	146835	1.798	1.908	31	26	71.5	26
Dr_P04_B	DR	P	19	28	15.88	13820	0.114906	749.6	135	0.1801	146111	1.798	1.908	31	26	71.5	26
Dr_P04_B	DR	P	19	29	16.43	13820	0.118886	747.3	136.1	0.1822	145660	1.798	1.908	31	26	71.5	26
Dr_P04_B	DR	P	19	30	17	13820	0.12301	744.6	136.7	0.1836	145137	1.798	1.908	31	26	71.5	26
Dr_P05_A	DR	P	20	1	0.5001	14190	0.00352431	829.9	86.57	0.1043	161829	1.83	1.925	29	24	59	24
Dr_P05_A	DR	P	20	2	1.071	14190	0.00754757	824.8	91.57	0.111	160828	1.83	1.925	29	24	59	24
Dr_P05_A	DR	P	20	3	1.64	14190	0.0115574	800.7	99.11	0.1238	156138	1.83	1.925	29	24	59	24
Dr_P05_A	DR	P	20	4	2.204	14190	0.0155321	788.4	92.63	0.1175	153739	1.83	1.925	29	24	59	24
Dr_P05_A	DR	P	20	5	2.777	14190	0.0195701	785	91.43	0.1165	153079	1.83	1.925	29	24	59	24
Dr_P05_A	DR	P	20	6	3.345	14190	0.0235729	776.6	102.4	0.1319	151433	1.83	1.925	29	24	59	24
Dr_P05_A	DR	P	20	7	3.913	14190	0.0275758	764.9	96.92	0.1267	149162	1.83	1.925	29	24	59	24
Dr_P05_A	DR	P	20	8	4.485	14190	0.0316068	761.6	103.6	0.136	148503	1.83	1.925	29	24	59	24
Dr_P05_A	DR	P	20	9	5.051	14190	0.0355955	749.7	99.91	0.1333	146196	1.83	1.925	29	24	59	24
Dr_P05_A	DR	P	20	10	5.621	14190	0.0396124	744.8	107.9	0.1448	145235	1.83	1.925	29	24	59	24
Dr_P05_A	DR	P	20	11	6.191	14190	0.0436293	739.1	103.9	0.1406	144121	1.83	1.925	29	24	59	24
Dr_P05_A	DR	P	20	12	6.755	14190	0.0476039	727.9	109.8	0.1509	141933	1.83	1.925	29	24	59	24
Dr_P05_A	DR	P	20	13	7.329	14190	0.051649	726.7	110.8	0.1525	141701	1.83	1.925	29	24	59	24
Dr_P05_A	DR	P	20	14	7.901	14190	0.0556801	720.3	109	0.1513	140467	1.83	1.925	29	24	59	24
Dr_P05_A	DR	P	20	15	8.465	14190	0.0596547	711.6	109.6	0.154	138764	1.83	1.925	29	24	59	24
Dr_P05_A	DR	P	20	16	9.034	14190	0.0636646	705.4	114.9	0.1629	137546	1.83	1.925	29	24	59	24
Dr_P05_A	DR	P	20	17	9.609	14190	0.0677167	701.2	116.3	0.1659	136740	1.83	1.925	29	24	59	24
Dr_P05_A	DR	P	20	18	10.17	14190	0.0716702	697.2	117.6	0.1687	135962	1.83	1.925	29	24	59	24
Dr_P05_A	DR	P	20	19	10.74	14190	0.0756871	692.6	118	0.1704	135048	1.83	1.925	29	24	59	24
Dr_P05_A	DR	P	20	20	11.31	14190	0.079704	687	118.5	0.1725	133974	1.83	1.925	29	24	59	24
Dr_P05_A	DR	P	20	21	11.88	14190	0.0837209	680.9	119.3	0.1752	132784	1.83	1.925	29	24	59	24
Dr_P05_A	DR	P	20	22	12.45	14190	0.0877378	673.1	121.2	0.1801	131252	1.83	1.925	29	24	59	24
Dr_P05_A	DR	P	20	23	13.02	14190	0.0917548	667.9	123.3	0.1847	130247	1.83	1.925	29	24	59	24
Dr_P05_A	DR	P	20	24	13.59	14190	0.0957717	663.3	125.5	0.1892	129342	1.83	1.925	29	24	59	24
Dr_P05_A	DR	P	20	25	14.16	14190	0.0997886	659.5	127.4	0.1931	128605	1.83	1.925	29	24	59	24
Dr_P05_A	DR	P	20	26	14.72	14190	0.103735	656.4	128.5	0.1958	127999	1.83	1.925	29	24	59	24
Dr_P05_A	DR	P	20	27	15.29	14190	0.107752	653.4	129.2	0.1977	127412	1.83	1.925	29	24	59	24
Dr_P05_A	DR	P	20	28	15.86	14190	0.111769	650.1	129.3	0.1989	126774	1.83	1.925	29	24	59	24
Dr_P05_A	DR	P	20	29	16.43	14190	0.115786	646.6	129.3	0.2	126085	1.83	1.925	29	24	59	24
Dr_P05_A	DR	P	20	30	17	14190	0.119803	642.5	129.6	0.2018	125288	1.83	1.925	29	24	59	24
Dr_P05_B	DR	P	20	1	0.5	14140	0.00353607	1115	113.3	0.1016	170245	1.628	1.69	25	20	62	20
Dr_P05_B	DR	P	20	2	1.068	14140	0.00755304	1075	125.2	0.1164	164203	1.628	1.69	25	20	62	20
Dr_P05_B	DR	P	20	3	1.637	14140	0.0115771	1069	128.3	0.1199	163281	1.628	1.69	25	20	62	20
Dr_P05_B	DR	P	20	4	2.206	14140	0.0156011	1050	120.3	0.1145	160375	1.628	1.69	25	20	62	20
Dr_P05_B	DR	P	20	5	2.777	14140	0.0196393	1045	121.1	0.1159	159532	1.628	1.69	25	20	62	20
Dr_P05_B	DR	P	20	6	3.344	14140	0.0236492	1029	136.9	0.1331	157045	1.628	1.69	25	20	62	20
Dr_P05_B	DR	P	20	7	3.912	14140	0.0276662	1015	128	0.1261	155018	1.628	1.69	25	20	62	20
Dr_P05_B	DR	P	20	8	4.485	14140	0.0317185	1004	141.6	0.1411	153258	1.628	1.69	25	20	62	20
Dr_P05_B	DR	P	20	9	5.054	14140	0.0357426	993.1	134.6	0.1355	151638	1.628	1.69	25	20	62	20
Dr_P05_B	DR	P	20	10	5.62	14140	0.0397454	978	145.8	0.1491	149328	1.628	1.69	25	20	62	20
Dr_P05_B	DR	P	20	11	6.192	14140	0.0437907	970.2	141.2	0.1455	148135	1.628	1.69	25	20	62	20
Dr_P05_B	DR	P	20	12	6.76	14140	0.0478076	953	145.2	0.1524	145515	1.628	1.69	25	20	62	20
Dr_P05_B	DR	P	20	13	7.329	14140	0.0518317	947.3	152.9	0.1614	144644	1.628	1.69	25	20	62	20
Dr_P05_B	DR	P	20	14	7.898	14140	0.0558557	939.7	153.6	0.1634	143485	1.628	1.69	25	20	62	20
Dr_P05_B	DR	P	20	15	8.457	14140	0.0598091	926.2	153.3	0.1655	141421	1.628	1.69	25	20	62	20
Dr_P05_B	DR	P	20	16	9.036	14140	0.0639038	911.6	157.2	0.1724	139190	1.628	1.69	25	20	62	20
Dr_P05_B	DR	P	20	17	9.605	14140	0.0679279	902.5	161.6	0.179	137800	1.628	1.69	25	20	62	20
Dr_P05_B	DR	P	20	18	10.18	14140	0.0719943	894.1	165.6	0.1852	136523	1.628	1.69	25	20	62	20
Dr_P05_B	DR	P	20	19	10.75	14140	0.0760255	886.3	168.1	0.1897	135322	1.628	1.69	25	20	62	20
Dr_P05_B	DR	P	20	20	11.31	14140	0.0799859	878.9	169.3	0.1926	134204	1.628	1.69	25	20	62	20
Dr_P05_B	DR	P	20	21	11.88	14140	0.084017	871.6	169.9	0.1949	133088	1.628	1.69	25	20	62	20
Dr_P05_B	DR	P	20	22	12.45	14140	0.0880481	863.2	170.5	0.1975	131796	1.628	1.69	25	20	62	20
Dr_P05_B	DR	P	20	23	13.02	14140	0.0920792	854.8	169.9	0.1987	130526	1.628	1.69	25	20	62	20
Dr_P05_B	DR	P	20	24	13.59	14140	0.0961103	845.9	170.5	0.2016	129164	1.628	1.69	25	20	62	20
Dr_P05_B	DR	P	20	25	14.16	14140	0.100141	838.6	172	0.2052	128044	1.628	1.69	25	20	62	20
Dr_P05_B	DR	P	20	26	14.73	14140	0.104173	833.7	175	0.2098	127300	1.628	1.69	25	20	62	20
Dr_P05_B	DR	P	20	27	15.3	14140	0.108204	825.7	176.7	0.2139	126080	1.628	1.69	25	20	62	20
Dr_P05_B	DR	P	20	28	15.87	14140	0.112235	821.4	177.8	0.2165	125418	1.628	1.69	25	20	62	20
Dr_P05_B	DR	P	20	29	16.43	14140	0.116195	817.5	178.5	0.2183	124828	1.628	1.69	25	20	62	20
Dr_P05_B	DR	P	20	30	17	14140	0.120226	813.5	178.7	0.2197	124218	1.628	1.69	25	20	62	20
Dr_P06_B	DR	P	21	1	0.5001	13740	0.00363974	1038	96.01	0.09248	219676	1.88	1.97	26	21	82.5	21
Dr_P06_B	DR	P	21	2	1.07	13740	0.00778748	1005	104.8	0.1043	212650	1.88	1.97	26	21	82.5	21
Dr_P06_B	DR	P	21	3	1.64	13740	0.011936	988.8	104.6	0.1058	209232	1.88	1.97	26	21	82.5	21
Dr_P06_B	DR	P	21	4	2.206	13740	0.0160553	977.3	110.7	0.1133	206790	1.88	1.97	26	21	82.5	21
Dr_P06_B	DR	P	21	5	2.774	13740	0.0201892	968.1	100.9	0.1043	204848	1.88	1.97	26	21	82.5	21
Dr_P06_B	DR	P	21	6	3.347	13740	0.0243595	966.9	101	0.1044	204589	1.88	1.97	26	21	82.5	21
Dr_P06_B	DR	P	21	7	3.912	13740	0.0284716	951.2	108.8	0.1144	201272	1.88	1.97	26	21	82.5	21
Dr_P06_B	DR	P	21	8	4.486	13740	0.0326492	949	105.4	0.1111	200802	1.88	1.97	26	21	82.5	21
Dr_P06_B	DR	P	21	9	5.05	13740	0.036754	933.9	110.7	0.1186	197611	1.88	1.97	26	21	82.5	21
Dr_P06_B	DR	P	21	10	5.624	13740	0.0409316	932.3	110.2	0.1182	197283	1.88	1.97	26	21	82.5	21
Dr_P06_B	DR	P	21	11	6.189	13740	0.0450437	918	112.7	0.1228	194245	1.88	1.97	26	21	82.5	21
Dr_P06_B	DR	P	21	12	6.763	13740	0.0492213	914.5	117.8	0.1288	193500	1.88	1.97	26	21	82.5	21
Dr_P06_B	DR	P	21	13	7.332	13740	0.0533624	909.6	116.3	0.1279	192475	1.88	1.97	26	21	82.5	21
Dr_P06_B	DR	P	21	14	7.901	13740	0.0575036	899.3	114.4	0.1272	190301	1.88	1.97	26	21	82.5	21
Dr_P06_B	DR	P	21	15	8.466	13740	0.0616157	887.2	119.7	0.1349	187736	1.88	1.97	26	21	82.5	21
Dr_P06_B	DR	P	21	16	9.039	13740	0.065786	884.2	123.8	0.14	187097	1.88	1.97	26	21	82.5	21
Dr_P06_B	DR	P	21	17	9.607	13740	0.0699199	878.2	122.9	0.1399	185834	1.88	1.97	26	21	82.5	21
Dr_P06_B	DR	P	21	18	10.18	13740	0.0740902	871.7	122.5	0.1405	184447	1.88	1.97	26	21	82.5	21
Dr_P06_B	DR	P	21	19	10.75	13740	0.0782387	863.8	122.6	0.1419	182777	1.88	1.97	26	21	82.5	21
Dr_P06_B	DR	P	21	20	11.32	13740	0.0823872	855.7	124	0.1449	181064	1.88	1.97	26	21	82.5	21
Dr_P06_B	DR	P	21	21	11.9	13740	0.0866084	848	126	0.1486	179437	1.88	1.97	26	21	82.5	21
Dr_P06_B	DR	P	21	22	12.45	13740	0.0906114	841.5	128.6	0.1528	178066	1.88	1.97	26	21	82.5	21
Dr_P06_B	DR	P	21	23	13.02	13740	0.0947598	836.3	131.1	0.1568	176956	1.88	1.97	26	21	82.5	21
Dr_P06_B	DR	P	21	24	13.59	13740	0.0989083	832	132.7	0.1595	176045	1.88	1.97	26	21	82.5	21
Dr_P06_B	DR	P	21	25	14.16	13740	0.103057	827.5	133.5	0.1613	175095	1.88	1.97	26	21	82.5	21
Dr_P06_B	DR	P	21	26	14.73	13740	0.107205	822.8	133.6	0.1623	174110	1.88	1.97	26	21	82.5	21
Dr_P06_B	DR	P	21	27	15.3	13740	0.111354	817.2	133.3	0.1631	172920	1.88	1.97	26	21	82.5	21
Dr_P06_B	DR	P	21	28	15.87	13740	0.115502	811.2	134.4	0.1657	171647	1.88	1.97	26	21	82.5	21
Dr_P06_B	DR	P	21	29	16.44	13740	0.119651	805.2	134.2	0.1667	170375	1.88	1.97	26	21	82.5	21
Dr_P06_B	DR	P	21	30	17	13740	0.123726	799.7	135.6	0.1696	169221	1.88	1.97	26	21	82.5	21
Dr_P07_A	DR	P	22	1	0.5	13120	0.00381098	1225	115.4	0.09417	334668	2.113	2.16	32	27	92	26
Dr_P07_A	DR	P	22	2	1.07	13120	0.00815549	1198	122.3	0.102	327310	2.113	2.16	32	27	92	26
Dr_P07_A	DR	P	22	3	1.638	13120	0.0124848	1178	120.3	0.1021	321720	2.113	2.16	32	27	92	26
Dr_P07_A	DR	P	22	4	2.208	13120	0.0168293	1159	122.4	0.1056	316430	2.113	2.16	32	27	92	26
Dr_P07_A	DR	P	22	5	2.775	13120	0.0211509	1135	143.9	0.1268	310054	2.113	2.16	32	27	92	26
Dr_P07_A	DR	P	22	6	3.344	13120	0.0254878	1112	133.3	0.1198	303684	2.113	2.16	32	27	92	26
Dr_P07_A	DR	P	22	7	3.917	13120	0.0298552	1104	144.4	0.1308	301647	2.113	2.16	32	27	92	26
Dr_P07_A	DR	P	22	8	4.483	13120	0.0341692	1081	139.3	0.1289	295177	2.113	2.16	32	27	92	26
Dr_P07_A	DR	P	22	9	5.055	13120	0.038529	1067	152.8	0.1432	291547	2.113	2.16	32	27	92	26
Dr_P07_A	DR	P	22	10	5.623	13120	0.0428582	1053	143.6	0.1364	287576	2.113	2.16	32	27	92	26
Dr_P07_A	DR	P	22	11	6.19	13120	0.0471799	1033	153.8	0.1489	282092	2.113	2.16	32	27	92	26
Dr_P07_A	DR	P	22	12	6.763	13120	0.0515473	1026	155	0.1511	280159	2.113	2.16	32	27	92	26
Dr_P07_A	DR	P	22	13	7.331	13120	0.0558765	1013	152.1	0.1501	276735	2.113	2.16	32	27	92	26
Dr_P07_A	DR	P	22	14	7.875	13120	0.0600229	997.1	157.8	0.1583	272319	2.113	2.16	32	27	92	26
Dr_P07_A	DR	P	22	15	8.47	13120	0.0645579	981.8	158.2	0.1611	268157	2.113	2.16	32	27	92	26
Dr_P07_A	DR	P	22	16	9.04	13120	0.0689024	974.4	161.7	0.1659	266132	2.113	2.16	32	27	92	26
Dr_P07_A	DR	P	22	17	9.606	13120	0.0732165	965.6	161.5	0.1673	263729	2.113	2.16	32	27	92	26
Dr_P07_A	DR	P	22	18	10.18	13120	0.0775915	956.3	160.9	0.1683	261201	2.113	2.16	32	27	92	26
Dr_P07_A	DR	P	22	19	10.74	13120	0.0818598	947	160.3	0.1692	258655	2.113	2.16	32	27	92	26
Dr_P07_A	DR	P	22	20	11.32	13120	0.0862805	934.2	160.1	0.1713	255157	2.113	2.16	32	27	92	26
Dr_P07_A	DR	P	22	21	11.89	13120	0.090625	923.1	161.4	0.1749	252108	2.113	2.16	32	27	92	26
Dr_P07_A	DR	P	22	22	12.46	13120	0.0949695	913.2	163.4	0.1789	249428	2.113	2.16	32	27	92	26
Dr_P07_A	DR	P	22	23	13.04	13120	0.0993902	904.6	166	0.1835	247079	2.113	2.16	32	27	92	26
Dr_P07_A	DR	P	22	24	13.6	13120	0.103659	897.4	167.4	0.1866	245107	2.113	2.16	32	27	92	26
Dr_P07_A	DR	P	22	25	14.16	13120	0.107927	890.2	168	0.1887	243130	2.113	2.16	32	27	92	26
Dr_P07_A	DR	P	22	26	14.73	13120	0.112271	882.8	168.1	0.1904	241117	2.113	2.16	32	27	92	26
Dr_P07_A	DR	P	22	27	15.29	13120	0.11654	875.8	168	0.1918	239209	2.113	2.16	32	27	92	26
Dr_P07_A	DR	P	22	28	15.87	13120	0.12096	867.2	167.4	0.193	236864	2.113	2.16	32	27	92	26
Dr_P07_A	DR	P	22	29	16.44	13120	0.125305	858.1	167.1	0.1948	234356	2.113	2.16	32	27	92	26
Dr_P07_A	DR	P	22	30	17.01	13120	0.129649	850.2	167.9	0.1975	232217	2.113	2.16	32	27	92	26
Dr_P08_A	DR	P	23	1	0.4999	14930	0.00334829	1330	128.8	0.09687	243372	2.085	2.145	29	24	84	24
Dr_P08_A	DR	P	23	2	1.068	14930	0.00715338	1354	139.4	0.103	247758	2.085	2.145	29	24	84	24
Dr_P08_A	DR	P	23	3	1.637	14930	0.0109645	1332	140.7	0.1056	243778	2.085	2.145	29	24	84	24
Dr_P08_A	DR	P	23	4	2.206	14930	0.0147756	1315	137	0.1042	240610	2.085	2.145	29	24	84	24
Dr_P08_A	DR	P	23	5	2.779	14930	0.0186135	1310	147.1	0.1123	239752	2.085	2.145	29	24	84	24
Dr_P08_A	DR	P	23	6	3.343	14930	0.0223912	1280	153.6	0.12	234286	2.085	2.145	29	24	84	24
Dr_P08_A	DR	P	23	7	3.915	14930	0.0262224	1266	149.6	0.1182	231632	2.085	2.145	29	24	84	24
Dr_P08_A	DR	P	23	8	4.485	14930	0.0300402	1249	165.8	0.1328	228518	2.085	2.145	29	24	84	24
Dr_P08_A	DR	P	23	9	5.052	14930	0.0338379	1236	156.3	0.1265	226132	2.085	2.145	29	24	84	24
Dr_P08_A	DR	P	23	10	5.62	14930	0.0376423	1219	168.9	0.1385	223132	2.085	2.145	29	24	84	24
Dr_P08_A	DR	P	23	11	6.192	14930	0.0414735	1212	165.1	0.1362	221778	2.085	2.145	29	24	84	24
Dr_P08_A	DR	P	23	12	6.767	14930	0.0453248	1189	171.6	0.1444	217533	2.085	2.145	29	24	84	24
Dr_P08_A	DR	P	23	13	7.332	14930	0.0491092	1178	176.8	0.15	215617	2.085	2.145	29	24	84	24
Dr_P08_A	DR	P	23	14	7.901	14930	0.0529203	1170	176.5	0.1509	214077	2.085	2.145	29	24	84	24
Dr_P08_A	DR	P	23	15	8.469	14930	0.0567247	1156	173.5	0.1501	211512	2.085	2.145	29	24	84	24
Dr_P08_A	DR	P	23	16	9.039	14930	0.0605425	1138	174.8	0.1535	208248	2.085	2.145	29	24	84	24
Dr_P08_A	DR	P	23	17	9.609	14930	0.0643603	1125	179	0.1591	205837	2.085	2.145	29	24	84	24
Dr_P08_A	DR	P	23	18	10.18	14930	0.0681849	1114	182.8	0.164	203885	2.085	2.145	29	24	84	24
Dr_P08_A	DR	P	23	19	10.75	14930	0.0720027	1104	185.7	0.1682	202039	2.085	2.145	29	24	84	24
Dr_P08_A	DR	P	23	20	11.32	14930	0.0758205	1094	187.8	0.1717	200203	2.085	2.145	29	24	84	24
Dr_P08_A	DR	P	23	21	11.88	14930	0.0795713	1085	187.7	0.173	198501	2.085	2.145	29	24	84	24
Dr_P08_A	DR	P	23	22	12.45	14930	0.0833891	1074	187	0.174	196571	2.085	2.145	29	24	84	24
Dr_P08_A	DR	P	23	23	13.02	14930	0.087207	1063	186.3	0.1752	194501	2.085	2.145	29	24	84	24
Dr_P08_A	DR	P	23	24	13.59	14930	0.0910248	1051	186.8	0.1777	192363	2.085	2.145	29	24	84	24
Dr_P08_A	DR	P	23	25	14.17	14930	0.0949096	1040	188.2	0.1809	190347	2.085	2.145	29	24	84	24
Dr_P08_A	DR	P	23	26	14.74	14930	0.0987274	1031	190.3	0.1846	188692	2.085	2.145	29	24	84	24
Dr_P08_A	DR	P	23	27	15.3	14930	0.102478	1022	192.8	0.1886	187080	2.085	2.145	29	24	84	24
Dr_P08_A	DR	P	23	28	15.87	14930	0.106296	1016	194.2	0.1913	185819	2.085	2.145	29	24	84	24
Dr_P08_A	DR	P	23	29	16.44	14930	0.110114	1009	194.6	0.1929	184583	2.085	2.145	29	24	84	24
Dr_P08_A	DR	P	23	30	17.01	14930	0.113932	1001	194.5	0.1943	183234	2.085	2.145	29	24	84	24
Dr_P09_A	DR	P	24	1	0.5	13430	0.00372301	1171	109.3	0.0933	157646	1.505	1.53	26	21	56	21
Dr_P09_A	DR	P	24	2	1.07	13430	0.00796724	1182	107.3	0.0908	159037	1.505	1.53	26	21	56	21
Dr_P09_A	DR	P	24	3	1.64	13430	0.0122115	1172	117.7	0.1004	157745	1.505	1.53	26	21	56	21
Dr_P09_A	DR	P	24	4	2.207	13430	0.0164334	1145	134.2	0.1172	154139	1.505	1.53	26	21	56	21
Dr_P09_A	DR	P	24	5	2.772	13430	0.0206404	1128	123.5	0.1095	151832	1.505	1.53	26	21	56	21
Dr_P09_A	DR	P	24	6	3.348	13430	0.0249293	1124	128.8	0.1145	151282	1.505	1.53	26	21	56	21
Dr_P09_A	DR	P	24	7	3.912	13430	0.0291288	1103	140.1	0.1271	148409	1.505	1.53	26	21	56	21
Dr_P09_A	DR	P	24	8	4.485	13430	0.0333954	1095	134	0.1223	147424	1.505	1.53	26	21	56	21
Dr_P09_A	DR	P	24	9	5.051	13430	0.0376098	1079	145.3	0.1347	145170	1.505	1.53	26	21	56	21
Dr_P09_A	DR	P	24	10	5.622	13430	0.0418615	1074	143.6	0.1337	144572	1.505	1.53	26	21	56	21
Dr_P09_A	DR	P	24	11	6.189	13430	0.0460834	1057	144.1	0.1363	142242	1.505	1.53	26	21	56	21
Dr_P09_A	DR	P	24	12	6.759	13430	0.0503276	1047	154.5	0.1475	140929	1.505	1.53	26	21	56	21
Dr_P09_A	DR	P	24	13	7.331	13430	0.0545867	1042	153.9	0.1478	140182	1.505	1.53	26	21	56	21
Dr_P09_A	DR	P	24	14	7.898	13430	0.0588086	1030	152.5	0.1481	138576	1.505	1.53	26	21	56	21
Dr_P09_A	DR	P	24	15	8.466	13430	0.063038	1015	158.7	0.1563	136604	1.505	1.53	26	21	56	21
Dr_P09_A	DR	P	24	16	9.037	13430	0.0672897	1011	163.8	0.1621	136010	1.505	1.53	26	21	56	21
Dr_P09_A	DR	P	24	17	9.61	13430	0.0715562	1002	164.4	0.1641	134860	1.505	1.53	26	21	56	21
Dr_P09_A	DR	P	24	18	10.17	13430	0.075726	993.3	165.4	0.1665	133685	1.505	1.53	26	21	56	21
Dr_P09_A	DR	P	24	19	10.74	13430	0.0799702	982.6	166.2	0.1691	132235	1.505	1.53	26	21	56	21
Dr_P09_A	DR	P	24	20	11.32	13430	0.0842889	970.8	167.8	0.1729	130648	1.505	1.53	26	21	56	21
Dr_P09_A	DR	P	24	21	11.89	13430	0.0885331	960.5	170.3	0.1773	129260	1.505	1.53	26	21	56	21
Dr_P09_A	DR	P	24	22	12.46	13430	0.0927774	951	173.2	0.1821	127984	1.505	1.53	26	21	56	21
Dr_P09_A	DR	P	24	23	13.03	13430	0.0970216	942.5	176	0.1868	126838	1.505	1.53	26	21	56	21
Dr_P09_A	DR	P	24	24	13.59	13430	0.101191	935.6	178.1	0.1904	125912	1.505	1.53	26	21	56	21
Dr_P09_A	DR	P	24	25	14.16	13430	0.105436	929.5	179.2	0.1928	125088	1.505	1.53	26	21	56	21
Dr_P09_A	DR	P	24	26	14.73	13430	0.10968	922.7	179.6	0.1946	124182	1.505	1.53	26	21	56	21
Dr_P09_A	DR	P	24	27	15.3	13430	0.113924	915.7	179.8	0.1963	123235	1.505	1.53	26	21	56	21
Dr_P09_A	DR	P	24	28	15.86	13430	0.118094	908.3	180.1	0.1983	122237	1.505	1.53	26	21	56	21
Dr_P09_A	DR	P	24	29	16.43	13430	0.122338	901	181.2	0.2011	121258	1.505	1.53	26	21	56	21
Dr_P09_A	DR	P	24	30	17	13430	0.126582	894.5	182.7	0.2042	120380	1.505	1.53	26	21	56	21
Dr_P09_B	DR	P	24	1	0.4999	15050	0.0033216	977.1	93.02	0.0952	163967	1.77	1.815	26	21	69	21
Dr_P09_B	DR	P	24	2	1.069	15050	0.00710299	980.8	92.82	0.09464	164578	1.77	1.815	26	21	69	21
Dr_P09_B	DR	P	24	3	1.641	15050	0.0109037	963	95.18	0.09883	161599	1.77	1.815	26	21	69	21
Dr_P09_B	DR	P	24	4	2.206	15050	0.0146578	943.7	111.7	0.1184	158364	1.77	1.815	26	21	69	21
Dr_P09_B	DR	P	24	5	2.774	15050	0.0184319	931.1	104.8	0.1126	156243	1.77	1.815	26	21	69	21
Dr_P09_B	DR	P	24	6	3.346	15050	0.0222326	927.5	105.6	0.1138	155638	1.77	1.815	26	21	69	21
Dr_P09_B	DR	P	24	7	3.915	15050	0.0260133	912.9	116.8	0.128	153184	1.77	1.815	26	21	69	21
Dr_P09_B	DR	P	24	8	4.483	15050	0.0297874	902.9	109.8	0.1216	151507	1.77	1.815	26	21	69	21
Dr_P09_B	DR	P	24	9	5.052	15050	0.0335681	890.7	119.6	0.1343	149474	1.77	1.815	26	21	69	21
Dr_P09_B	DR	P	24	10	5.623	15050	0.0373621	887.2	116	0.1307	148877	1.77	1.815	26	21	69	21
Dr_P09_B	DR	P	24	11	6.188	15050	0.0411163	869.3	119.8	0.1378	145874	1.77	1.815	26	21	69	21
Dr_P09_B	DR	P	24	12	6.764	15050	0.0449435	865.3	125.9	0.1455	145197	1.77	1.815	26	21	69	21
Dr_P09_B	DR	P	24	13	7.331	15050	0.048711	859.1	122.4	0.1425	144162	1.77	1.815	26	21	69	21
Dr_P09_B	DR	P	24	14	7.899	15050	0.052485	847.4	120.8	0.1425	142198	1.77	1.815	26	21	69	21
Dr_P09_B	DR	P	24	15	8.467	15050	0.0562591	836.2	126.1	0.1508	140324	1.77	1.815	26	21	69	21
Dr_P09_B	DR	P	24	16	9.039	15050	0.0600598	832.8	128.4	0.1541	139742	1.77	1.815	26	21	69	21
Dr_P09_B	DR	P	24	17	9.604	15050	0.063814	826.5	127.9	0.1548	138691	1.77	1.815	26	21	69	21
Dr_P09_B	DR	P	24	18	10.18	15050	0.0676412	818.9	127.5	0.1558	137416	1.77	1.815	26	21	69	21
Dr_P09_B	DR	P	24	19	10.75	15050	0.0714286	810.3	127.7	0.1576	135973	1.77	1.815	26	21	69	21
Dr_P09_B	DR	P	24	20	11.32	15050	0.0752159	802.2	128.9	0.1607	134617	1.77	1.815	26	21	69	21
Dr_P09_B	DR	P	24	21	11.89	15050	0.0790033	794.6	130.8	0.1646	133347	1.77	1.815	26	21	69	21
Dr_P09_B	DR	P	24	22	12.49	15050	0.08299	787.3	133.3	0.1693	132111	1.77	1.815	26	21	69	21
Dr_P09_B	DR	P	24	23	13.03	15050	0.0865781	782.3	134.7	0.1722	131275	1.77	1.815	26	21	69	21
Dr_P09_B	DR	P	24	24	13.59	15050	0.090299	777.8	135.3	0.1739	130525	1.77	1.815	26	21	69	21
Dr_P09_B	DR	P	24	25	14.16	15050	0.0940864	773.3	135.3	0.1749	129772	1.77	1.815	26	21	69	21
Dr_P09_B	DR	P	24	26	14.73	15050	0.0978738	768.5	134.9	0.1755	128958	1.77	1.815	26	21	69	21
Dr_P09_B	DR	P	24	27	15.3	15050	0.101661	763.2	134.5	0.1762	128062	1.77	1.815	26	21	69	21
Dr_P09_B	DR	P	24	28	15.87	15050	0.105449	757.5	134.6	0.1776	127107	1.77	1.815	26	21	69	21
Dr_P09_B	DR	P	24	29	16.44	15050	0.109236	752	135.2	0.1798	126195	1.77	1.815	26	21	69	21
Dr_P09_B	DR	P	24	30	17.01	15050	0.113023	747.3	136.4	0.1825	125399	1.77	1.815	26	21	69	21
Dr_P10_A	DR	P	25	1	0.5002	13460	0.0037162	1017	84.39	0.083	158979	1.605	1.67	30	25	76	23.5
Dr_P10_A	DR	P	25	2	0.9998	13460	0.00742794	980.2	81.05	0.08269	153271	1.605	1.67	30	25	76	23.5
Dr_P10_A	DR	P	25	3	1.5	13460	0.0111441	973.6	78.57	0.0807	152241	1.605	1.67	30	25	76	23.5
Dr_P10_A	DR	P	25	4	2.002	13460	0.0148737	980.3	87.98	0.08975	153282	1.605	1.67	30	25	76	23.5
Dr_P10_A	DR	P	25	5	2.499	13460	0.0185661	963	97.76	0.1015	150582	1.605	1.67	30	25	76	23.5
Dr_P10_A	DR	P	25	6	2.997	13460	0.022266	956.2	90.35	0.09449	149522	1.605	1.67	30	25	76	23.5
Dr_P10_A	DR	P	25	7	3.502	13460	0.0260178	957	95.24	0.09953	149638	1.605	1.67	30	25	76	23.5
Dr_P10_A	DR	P	25	8	3.997	13460	0.0296954	939.3	96.84	0.1031	146875	1.605	1.67	30	25	76	23.5
Dr_P10_A	DR	P	25	9	4.501	13460	0.0334398	941.6	100.7	0.107	147229	1.605	1.67	30	25	76	23.5
Dr_P10_A	DR	P	25	10	4.997	13460	0.0371248	927	101.1	0.1091	144956	1.605	1.67	30	25	76	23.5
Dr_P10_A	DR	P	25	11	5.5	13460	0.0408618	926.4	108.6	0.1172	144852	1.605	1.67	30	25	76	23.5
Dr_P10_A	DR	P	25	12	6.002	13460	0.0445914	919.4	105.1	0.1143	143762	1.605	1.67	30	25	76	23.5
Dr_P10_A	DR	P	25	13	6.498	13460	0.0482764	908	109	0.1201	141976	1.605	1.67	30	25	76	23.5
Dr_P10_A	DR	P	25	14	7.001	13460	0.0520134	905.5	114.4	0.1263	141594	1.605	1.67	30	25	76	23.5
Dr_P10_A	DR	P	25	15	7.499	13460	0.0557132	902.9	113.9	0.1261	141184	1.605	1.67	30	25	76	23.5
Dr_P10_A	DR	P	25	16	8.002	13460	0.0594502	895.2	112.4	0.1255	139986	1.605	1.67	30	25	76	23.5
Dr_P10_A	DR	P	25	17	8.499	13460	0.0631426	888.2	114.4	0.1288	138878	1.605	1.67	30	25	76	23.5
Dr_P10_A	DR	P	25	18	9	13460	0.0668648	881.5	116.8	0.1325	137836	1.605	1.67	30	25	76	23.5
Dr_P10_A	DR	P	25	19	9.502	13460	0.0705944	876.3	119.9	0.1369	137026	1.605	1.67	30	25	76	23.5
Dr_P10_A	DR	P	25	20	10	13460	0.0742942	871.1	122.8	0.1409	136204	1.605	1.67	30	25	76	23.5
Dr_P10_A	DR	P	25	21	10.5	13460	0.0780089	867.6	124.7	0.1437	135657	1.605	1.67	30	25	76	23.5
Dr_P10_A	DR	P	25	22	11	13460	0.0817236	863.4	125.5	0.1454	135007	1.605	1.67	30	25	76	23.5
Dr_P10_A	DR	P	25	23	11.5	13460	0.0854383	858.7	125.7	0.1464	134274	1.605	1.67	30	25	76	23.5
Dr_P10_A	DR	P	25	24	12	13460	0.089153	854	125.7	0.1472	133531	1.605	1.67	30	25	76	23.5
Dr_P10_A	DR	P	25	25	12.5	13460	0.0928678	848.4	126	0.1485	132654	1.605	1.67	30	25	76	23.5
Dr_P10_A	DR	P	25	26	13.02	13460	0.0967311	840.5	126.3	0.1502	131431	1.605	1.67	30	25	76	23.5
Dr_P10_A	DR	P	25	27	13.5	13460	0.100297	835.8	128.8	0.1541	130686	1.605	1.67	30	25	76	23.5
Dr_P10_A	DR	P	25	28	14	13460	0.104012	831.7	131.1	0.1576	130044	1.605	1.67	30	25	76	23.5
Dr_P10_A	DR	P	25	29	14.5	13460	0.107727	828.7	133.1	0.1606	129576	1.605	1.67	30	25	76	23.5
Dr_P10_A	DR	P	25	30	15	13460	0.111441	825.8	134.1	0.1624	129123	1.605	1.67	30	25	76	23.5
Dr_P10_B	DR	P	25	1	0.4999	14970	0.00333935	986.1	96.19	0.09754	137790	1.648	1.618	29	24	59.5	23
Dr_P10_B	DR	P	25	2	0.9998	14970	0.00667869	976.5	97.3	0.09964	136457	1.648	1.618	29	24	59.5	23
Dr_P10_B	DR	P	25	3	1.501	14970	0.0100267	976.2	95.94	0.09828	136407	1.648	1.618	29	24	59.5	23
Dr_P10_B	DR	P	25	4	2.001	14970	0.0133667	963.9	113.8	0.1181	134686	1.648	1.618	29	24	59.5	23
Dr_P10_B	DR	P	25	5	2.497	14970	0.01668	946.2	104.9	0.1108	132213	1.648	1.618	29	24	59.5	23
Dr_P10_B	DR	P	25	6	3.002	14970	0.0200534	943.2	106	0.1124	131804	1.648	1.618	29	24	59.5	23
Dr_P10_B	DR	P	25	7	3.499	14970	0.0233734	928.1	115.9	0.1249	129684	1.648	1.618	29	24	59.5	23
Dr_P10_B	DR	P	25	8	4.001	14970	0.0267268	923.2	109.4	0.1185	129006	1.648	1.618	29	24	59.5	23
Dr_P10_B	DR	P	25	9	4.498	14970	0.0300468	911.5	118.9	0.1305	127374	1.648	1.618	29	24	59.5	23
Dr_P10_B	DR	P	25	10	5.001	14970	0.0334068	906.4	114.1	0.1259	126656	1.648	1.618	29	24	59.5	23
Dr_P10_B	DR	P	25	11	5.498	14970	0.0367268	894.9	121	0.1352	125047	1.648	1.618	29	24	59.5	23
Dr_P10_B	DR	P	25	12	6.002	14970	0.0400935	893	121.8	0.1365	124779	1.648	1.618	29	24	59.5	23
Dr_P10_B	DR	P	25	13	6.501	14970	0.0434269	885.2	119.9	0.1354	123691	1.648	1.618	29	24	59.5	23
Dr_P10_B	DR	P	25	14	6.998	14970	0.0467468	871.8	123.1	0.1413	121819	1.648	1.618	29	24	59.5	23
Dr_P10_B	DR	P	25	15	7.502	14970	0.0501136	868.3	128.3	0.1477	121329	1.648	1.618	29	24	59.5	23
Dr_P10_B	DR	P	25	16	8.003	14970	0.0534603	864.2	127.8	0.1479	120763	1.648	1.618	29	24	59.5	23
Dr_P10_B	DR	P	25	17	8.498	14970	0.0567669	858	127.8	0.149	119895	1.648	1.618	29	24	59.5	23
Dr_P10_B	DR	P	25	18	9	14970	0.0601202	850.6	128.2	0.1507	118866	1.648	1.618	29	24	59.5	23
Dr_P10_B	DR	P	25	19	9.503	14970	0.0634803	843.6	130	0.1541	117876	1.648	1.618	29	24	59.5	23
Dr_P10_B	DR	P	25	20	10	14970	0.0668003	836.7	132.5	0.1584	116916	1.648	1.618	29	24	59.5	23
Dr_P10_B	DR	P	25	21	10.5	14970	0.0701403	830.9	135.4	0.163	116101	1.648	1.618	29	24	59.5	23
Dr_P10_B	DR	P	25	22	11	14970	0.0734803	826.3	138.1	0.1672	115460	1.648	1.618	29	24	59.5	23
Dr_P10_B	DR	P	25	23	11.5	14970	0.0768203	822.8	139.9	0.17	114971	1.648	1.618	29	24	59.5	23
Dr_P10_B	DR	P	25	24	12	14970	0.0801603	819.1	140.9	0.172	114463	1.648	1.618	29	24	59.5	23
Dr_P10_B	DR	P	25	25	12.5	14970	0.0835003	814.9	141.3	0.1734	113877	1.648	1.618	29	24	59.5	23
Dr_P10_B	DR	P	25	26	13	14970	0.0868403	810.1	141.6	0.1748	113200	1.648	1.618	29	24	59.5	23
Dr_P10_B	DR	P	25	27	13.5	14970	0.0901804	804.4	142.5	0.1771	112400	1.648	1.618	29	24	59.5	23
Dr_P10_B	DR	P	25	28	14	14970	0.0935204	799.4	143.6	0.1797	111706	1.648	1.618	29	24	59.5	23
Dr_P10_B	DR	P	25	29	14.5	14970	0.0968604	794.9	145.4	0.1829	111072	1.648	1.618	29	24	59.5	23
Dr_P10_B	DR	P	25	30	15	14970	0.1002	791.2	147.5	0.1864	110556	1.648	1.618	29	24	59.5	23
Dr_P12_A	DR	P	26	1	0.5	14120	0.00354108	883.1	86.3	0.09772	217873	2.068	2.145	27	22	76.5	22.5
Dr_P12_A	DR	P	26	2	1.068	14120	0.00756374	859.4	88.51	0.103	212023	2.068	2.145	27	22	76.5	22.5
Dr_P12_A	DR	P	26	3	1.635	14120	0.0115793	849.5	93.82	0.1104	209562	2.068	2.145	27	22	76.5	22.5
Dr_P12_A	DR	P	26	4	2.205	14120	0.0156161	838.7	89.97	0.1073	206921	2.068	2.145	27	22	76.5	22.5
Dr_P12_A	DR	P	26	5	2.777	14120	0.0196671	835.4	92.48	0.1107	206082	2.068	2.145	27	22	76.5	22.5
Dr_P12_A	DR	P	26	6	3.343	14120	0.0236756	820.6	103.8	0.1265	202436	2.068	2.145	27	22	76.5	22.5
Dr_P12_A	DR	P	26	7	3.912	14120	0.0277054	812.4	96.98	0.1194	200412	2.068	2.145	27	22	76.5	22.5
Dr_P12_A	DR	P	26	8	4.483	14120	0.0317493	802	107.2	0.1337	197853	2.068	2.145	27	22	76.5	22.5
Dr_P12_A	DR	P	26	9	5.053	14120	0.0357861	793.3	101.3	0.1276	195719	2.068	2.145	27	22	76.5	22.5
Dr_P12_A	DR	P	26	10	5.621	14120	0.0398088	783.6	111.5	0.1423	193314	2.068	2.145	27	22	76.5	22.5
Dr_P12_A	DR	P	26	11	6.192	14120	0.0438527	775	105.1	0.1356	191205	2.068	2.145	27	22	76.5	22.5
Dr_P12_A	DR	P	26	12	6.76	14120	0.0478754	763.2	109.9	0.144	188271	2.068	2.145	27	22	76.5	22.5
Dr_P12_A	DR	P	26	13	7.331	14120	0.0519193	759.3	113.5	0.1495	187310	2.068	2.145	27	22	76.5	22.5
Dr_P12_A	DR	P	26	14	7.899	14120	0.0559419	752.3	112.1	0.149	185582	2.068	2.145	27	22	76.5	22.5
Dr_P12_A	DR	P	26	15	8.471	14120	0.0599929	741.1	111.3	0.1502	182841	2.068	2.145	27	22	76.5	22.5
Dr_P12_A	DR	P	26	16	9.036	14120	0.0639943	730.4	116.1	0.159	180203	2.068	2.145	27	22	76.5	22.5
Dr_P12_A	DR	P	26	17	9.61	14120	0.0680595	725.4	118	0.1626	178951	2.068	2.145	27	22	76.5	22.5
Dr_P12_A	DR	P	26	18	10.18	14120	0.0720963	718.4	120.5	0.1678	177235	2.068	2.145	27	22	76.5	22.5
Dr_P12_A	DR	P	26	19	10.75	14120	0.0761331	712.4	119.9	0.1683	175757	2.068	2.145	27	22	76.5	22.5
Dr_P12_A	DR	P	26	20	11.31	14120	0.0800991	706	119.7	0.1695	174162	2.068	2.145	27	22	76.5	22.5
Dr_P12_A	DR	P	26	21	11.88	14120	0.084136	698.4	119.4	0.171	172290	2.068	2.145	27	22	76.5	22.5
Dr_P12_A	DR	P	26	22	12.46	14120	0.0882436	690.6	119.8	0.1735	170376	2.068	2.145	27	22	76.5	22.5
Dr_P12_A	DR	P	26	23	13.02	14120	0.0922096	683.8	120.9	0.1768	168687	2.068	2.145	27	22	76.5	22.5
Dr_P12_A	DR	P	26	24	13.6	14120	0.0963173	677.2	122.3	0.1806	167069	2.068	2.145	27	22	76.5	22.5
Dr_P12_A	DR	P	26	25	14.18	14120	0.100425	670.7	124.4	0.1854	165458	2.068	2.145	27	22	76.5	22.5
Dr_P12_A	DR	P	26	26	14.73	14120	0.10432	666.7	125.3	0.188	164473	2.068	2.145	27	22	76.5	22.5
Dr_P12_A	DR	P	26	27	15.3	14120	0.108357	662.5	125.6	0.1896	163430	2.068	2.145	27	22	76.5	22.5
Dr_P12_A	DR	P	26	28	15.87	14120	0.112394	658.1	125.6	0.1909	162345	2.068	2.145	27	22	76.5	22.5
Dr_P12_A	DR	P	26	29	16.43	14120	0.11636	653.4	125.3	0.1918	161188	2.068	2.145	27	22	76.5	22.5
Dr_P12_A	DR	P	26	30	17	14120	0.120397	648.4	125.1	0.1929	159972	2.068	2.145	27	22	76.5	22.5
Dr_P13_A	DR	P	27	1	0.4999	14180	0.00352539	684.6	55.53	0.08112	127949	1.823	1.853	26	21	68.5	21
Dr_P13_A	DR	P	27	2	1.069	14180	0.00753879	656.6	56.71	0.08637	122722	1.823	1.853	26	21	68.5	21
Dr_P13_A	DR	P	27	3	1.637	14180	0.0115444	647.4	57.29	0.0885	120998	1.823	1.853	26	21	68.5	21
Dr_P13_A	DR	P	27	4	2.206	14180	0.0155571	650.8	53.22	0.08178	121646	1.823	1.853	26	21	68.5	21
Dr_P13_A	DR	P	27	5	2.778	14180	0.019591	650.5	61.76	0.09493	121593	1.823	1.853	26	21	68.5	21
Dr_P13_A	DR	P	27	6	3.341	14180	0.0235614	640.7	58.68	0.09159	119747	1.823	1.853	26	21	68.5	21
Dr_P13_A	DR	P	27	7	3.915	14180	0.0276093	642.5	58.77	0.09147	120094	1.823	1.853	26	21	68.5	21
Dr_P13_A	DR	P	27	8	4.48	14180	0.0315938	634.6	62.62	0.09868	118615	1.823	1.853	26	21	68.5	21
Dr_P13_A	DR	P	27	9	5.054	14180	0.0356417	637	61.17	0.09603	119066	1.823	1.853	26	21	68.5	21
Dr_P13_A	DR	P	27	10	5.619	14180	0.0396262	629	63.7	0.1013	117558	1.823	1.853	26	21	68.5	21
Dr_P13_A	DR	P	27	11	6.191	14180	0.0436601	631.2	65.37	0.1036	117969	1.823	1.853	26	21	68.5	21
Dr_P13_A	DR	P	27	12	6.759	14180	0.0476657	626.5	63.03	0.1006	117103	1.823	1.853	26	21	68.5	21
Dr_P13_A	DR	P	27	13	7.323	14180	0.0516432	621.9	69.2	0.1113	116239	1.823	1.853	26	21	68.5	21
Dr_P13_A	DR	P	27	14	7.898	14180	0.0556982	623.2	67.51	0.1083	116475	1.823	1.853	26	21	68.5	21
Dr_P13_A	DR	P	27	15	8.467	14180	0.0597109	619.4	66.15	0.1068	115770	1.823	1.853	26	21	68.5	21
Dr_P13_A	DR	P	27	16	9.033	14180	0.0637024	614.6	68.95	0.1122	114865	1.823	1.853	26	21	68.5	21
Dr_P13_A	DR	P	27	17	9.604	14180	0.0677292	612.9	70.9	0.1157	114561	1.823	1.853	26	21	68.5	21
Dr_P13_A	DR	P	27	18	10.17	14180	0.0717207	612	72.22	0.118	114390	1.823	1.853	26	21	68.5	21
Dr_P13_A	DR	P	27	19	10.74	14180	0.0757405	610.9	72.67	0.119	114185	1.823	1.853	26	21	68.5	21
Dr_P13_A	DR	P	27	20	11.31	14180	0.0797602	609.3	72.64	0.1192	113887	1.823	1.853	26	21	68.5	21
Dr_P13_A	DR	P	27	21	11.88	14180	0.08378	607.1	72.48	0.1194	113476	1.823	1.853	26	21	68.5	21
Dr_P13_A	DR	P	27	22	12.45	14180	0.0877997	604.2	72.63	0.1202	112933	1.823	1.853	26	21	68.5	21
Dr_P13_A	DR	P	27	23	13.02	14180	0.0918195	601.2	73.43	0.1221	112369	1.823	1.853	26	21	68.5	21
Dr_P13_A	DR	P	27	24	13.59	14180	0.0958392	598.5	74.71	0.1248	111859	1.823	1.853	26	21	68.5	21
Dr_P13_A	DR	P	27	25	14.16	14180	0.099859	596.4	76.36	0.128	111479	1.823	1.853	26	21	68.5	21
Dr_P13_A	DR	P	27	26	14.73	14180	0.103879	594.4	78.13	0.1315	111095	1.823	1.853	26	21	68.5	21
Dr_P13_A	DR	P	27	27	15.29	14180	0.107828	593.8	78.96	0.133	110979	1.823	1.853	26	21	68.5	21
Dr_P13_A	DR	P	27	28	15.86	14180	0.111848	592.9	79.41	0.1339	110816	1.823	1.853	26	21	68.5	21
Dr_P13_A	DR	P	27	29	16.43	14180	0.115867	591.8	79.5	0.1343	110619	1.823	1.853	26	21	68.5	21
Dr_P13_A	DR	P	27	30	17	14180	0.119887	590.3	79.46	0.1346	110328	1.823	1.853	26	21	68.5	21
Dr_P14_A	DR	P	28	1	0.4999	13440	0.00371949	835.5	80.63	0.0965	156441	1.775	1.805	31	26	69	26
Dr_P14_A	DR	P	28	2	1.068	13440	0.00794643	808.7	83.36	0.1031	151428	1.775	1.805	31	26	69	26
Dr_P14_A	DR	P	28	3	1.637	13440	0.0121801	803.6	88.15	0.1097	150467	1.775	1.805	31	26	69	26
Dr_P14_A	DR	P	28	4	2.206	13440	0.0164137	797.5	81.79	0.1026	149316	1.775	1.805	31	26	69	26
Dr_P14_A	DR	P	28	5	2.78	13440	0.0206845	793.6	87.83	0.1107	148594	1.775	1.805	31	26	69	26
Dr_P14_A	DR	P	28	6	3.344	13440	0.024881	776	95.05	0.1225	145304	1.775	1.805	31	26	69	26
Dr_P14_A	DR	P	28	7	3.916	13440	0.0291369	772.2	90	0.1165	144591	1.775	1.805	31	26	69	26
Dr_P14_A	DR	P	28	8	4.482	13440	0.0333482	761.3	99.72	0.131	142542	1.775	1.805	31	26	69	26
Dr_P14_A	DR	P	28	9	5.051	13440	0.0375818	752.9	94.33	0.1253	140969	1.775	1.805	31	26	69	26
Dr_P14_A	DR	P	28	10	5.62	13440	0.0418155	744.5	102.4	0.1375	139394	1.775	1.805	31	26	69	26
Dr_P14_A	DR	P	28	11	6.192	13440	0.0460714	739.6	99.28	0.1342	138482	1.775	1.805	31	26	69	26
Dr_P14_A	DR	P	28	12	6.759	13440	0.0502902	727	101.8	0.14	136128	1.775	1.805	31	26	69	26
Dr_P14_A	DR	P	28	13	7.329	13440	0.0545313	722.4	107.4	0.1486	135267	1.775	1.805	31	26	69	26
Dr_P14_A	DR	P	28	14	7.899	13440	0.0587723	718.3	107.4	0.1496	134497	1.775	1.805	31	26	69	26
Dr_P14_A	DR	P	28	15	8.468	13440	0.063006	709.7	106.4	0.1499	132881	1.775	1.805	31	26	69	26
Dr_P14_A	DR	P	28	16	9.035	13440	0.0672247	699.9	108.4	0.1549	131045	1.775	1.805	31	26	69	26
Dr_P14_A	DR	P	28	17	9.609	13440	0.0714955	692.9	111.7	0.1612	129737	1.775	1.805	31	26	69	26
Dr_P14_A	DR	P	28	18	10.18	13440	0.075744	686.7	114.6	0.1669	128571	1.775	1.805	31	26	69	26
Dr_P14_A	DR	P	28	19	10.74	13440	0.0799107	681.2	117	0.1718	127545	1.775	1.805	31	26	69	26
Dr_P14_A	DR	P	28	20	11.31	13440	0.0841518	676.2	118.4	0.1751	126615	1.775	1.805	31	26	69	26
Dr_P14_A	DR	P	28	21	11.88	13440	0.0883929	671	119	0.1774	125644	1.775	1.805	31	26	69	26
Dr_P14_A	DR	P	28	22	12.45	13440	0.0926339	665.6	119.2	0.1791	124624	1.775	1.805	31	26	69	26
Dr_P14_A	DR	P	28	23	13.02	13440	0.096875	659.6	119.2	0.1806	123504	1.775	1.805	31	26	69	26
Dr_P14_A	DR	P	28	24	13.59	13440	0.101116	653.3	119.7	0.1832	122329	1.775	1.805	31	26	69	26
Dr_P14_A	DR	P	28	25	14.16	13440	0.105357	648	120.9	0.1865	121332	1.775	1.805	31	26	69	26
Dr_P14_A	DR	P	28	26	14.73	13440	0.109598	643	122.3	0.1902	120403	1.775	1.805	31	26	69	26
Dr_P14_A	DR	P	28	27	15.3	13440	0.113839	638.6	124.1	0.1943	119571	1.775	1.805	31	26	69	26
Dr_P14_A	DR	P	28	28	15.87	13440	0.11808	634.8	125.2	0.1973	118852	1.775	1.805	31	26	69	26
Dr_P14_A	DR	P	28	29	16.43	13440	0.122247	631.4	125.6	0.199	118223	1.775	1.805	31	26	69	26
Dr_P14_A	DR	P	28	30	17	13440	0.126488	627.9	125.8	0.2003	117563	1.775	1.805	31	26	69	26
Dr_P14_B	DR	P	28	1	0.5001	13750	0.00363709	805.3	81.26	0.1009	204202	2.07	2.145	28	23	82.5	23.5
Dr_P14_B	DR	P	28	2	1.069	13750	0.00777454	778.7	90.35	0.116	197451	2.07	2.145	28	23	82.5	23.5
Dr_P14_B	DR	P	28	3	1.638	13750	0.0119127	773.7	91.44	0.1182	196190	2.07	2.145	28	23	82.5	23.5
Dr_P14_B	DR	P	28	4	2.206	13750	0.0160436	758.3	91.16	0.1202	192279	2.07	2.145	28	23	82.5	23.5
Dr_P14_B	DR	P	28	5	2.773	13750	0.0201673	746.2	85.39	0.1144	189233	2.07	2.145	28	23	82.5	23.5
Dr_P14_B	DR	P	28	6	3.347	13750	0.0243418	744.9	91.13	0.1223	188898	2.07	2.145	28	23	82.5	23.5
Dr_P14_B	DR	P	28	7	3.913	13750	0.0284582	729.1	97.05	0.1331	184881	2.07	2.145	28	23	82.5	23.5
Dr_P14_B	DR	P	28	8	4.484	13750	0.0326109	725.3	93.52	0.1289	183933	2.07	2.145	28	23	82.5	23.5
Dr_P14_B	DR	P	28	9	5.051	13750	0.0367345	712.7	100.7	0.1413	180724	2.07	2.145	28	23	82.5	23.5
Dr_P14_B	DR	P	28	10	5.624	13750	0.0409018	707.9	97.16	0.1373	179500	2.07	2.145	28	23	82.5	23.5
Dr_P14_B	DR	P	28	11	6.19	13750	0.0450182	694.6	100.8	0.1451	176133	2.07	2.145	28	23	82.5	23.5
Dr_P14_B	DR	P	28	12	6.761	13750	0.0491709	691	104.7	0.1516	175228	2.07	2.145	28	23	82.5	23.5
Dr_P14_B	DR	P	28	13	7.331	13750	0.0533164	684.8	102.4	0.1495	173644	2.07	2.145	28	23	82.5	23.5
Dr_P14_B	DR	P	28	14	7.899	13750	0.0574473	674.7	101.8	0.1508	171081	2.07	2.145	28	23	82.5	23.5
Dr_P14_B	DR	P	28	15	8.466	13750	0.0615709	665	106.6	0.1603	168632	2.07	2.145	28	23	82.5	23.5
Dr_P14_B	DR	P	28	16	9.038	13750	0.0657309	661.4	108.5	0.164	167712	2.07	2.145	28	23	82.5	23.5
Dr_P14_B	DR	P	28	17	9.61	13750	0.0698909	656	108.7	0.1657	166342	2.07	2.145	28	23	82.5	23.5
Dr_P14_B	DR	P	28	18	10.18	13750	0.0740364	649.9	108.2	0.1665	164798	2.07	2.145	28	23	82.5	23.5
Dr_P14_B	DR	P	28	19	10.74	13750	0.0781091	642	109.5	0.1705	162788	2.07	2.145	28	23	82.5	23.5
Dr_P14_B	DR	P	28	20	11.32	13750	0.0823273	635.9	108.6	0.1707	161254	2.07	2.145	28	23	82.5	23.5
Dr_P14_B	DR	P	28	21	11.89	13750	0.0864727	629.3	109.6	0.1742	159567	2.07	2.145	28	23	82.5	23.5
Dr_P14_B	DR	P	28	22	12.46	13750	0.0906182	623.1	111	0.1781	158014	2.07	2.145	28	23	82.5	23.5
Dr_P14_B	DR	P	28	23	13.03	13750	0.0947636	618.1	112.5	0.182	156738	2.07	2.145	28	23	82.5	23.5
Dr_P14_B	DR	P	28	24	13.6	13750	0.0989091	613.6	113.5	0.185	155589	2.07	2.145	28	23	82.5	23.5
Dr_P14_B	DR	P	28	25	14.16	13750	0.102982	609.4	114	0.1871	154531	2.07	2.145	28	23	82.5	23.5
Dr_P14_B	DR	P	28	26	14.73	13750	0.107127	605.5	114.1	0.1885	153543	2.07	2.145	28	23	82.5	23.5
Dr_P14_B	DR	P	28	27	15.3	13750	0.111273	601.2	113.6	0.189	152459	2.07	2.145	28	23	82.5	23.5
Dr_P14_B	DR	P	28	28	15.87	13750	0.115418	596.5	113.4	0.1901	151267	2.07	2.145	28	23	82.5	23.5
Dr_P14_B	DR	P	28	29	16.43	13750	0.119491	591.7	113.7	0.1922	150038	2.07	2.145	28	23	82.5	23.5
Dr_P14_B	DR	P	28	30	17.01	13750	0.123709	587.5	115	0.1957	148990	2.07	2.145	28	23	82.5	23.5
Dr_P15_A	DR	P	29	1	0.5001	14540	0.00343948	866.6	86.89	0.1003	179270	1.94	1.975	26	21	65.5	21.5
Dr_P15_A	DR	P	29	2	1.069	14540	0.00735213	868.9	95.61	0.11	179755	1.94	1.975	26	21	65.5	21.5
Dr_P15_A	DR	P	29	3	1.637	14540	0.0112586	860.8	99.88	0.116	178068	1.94	1.975	26	21	65.5	21.5
Dr_P15_A	DR	P	29	4	2.205	14540	0.0151651	846.1	93.43	0.1104	175035	1.94	1.975	26	21	65.5	21.5
Dr_P15_A	DR	P	29	5	2.775	14540	0.0190853	845.1	93.64	0.1108	174829	1.94	1.975	26	21	65.5	21.5
Dr_P15_A	DR	P	29	6	3.346	14540	0.0230124	828.5	106.5	0.1285	171396	1.94	1.975	26	21	65.5	21.5
Dr_P15_A	DR	P	29	7	3.913	14540	0.026912	819.3	98.97	0.1208	169502	1.94	1.975	26	21	65.5	21.5
Dr_P15_A	DR	P	29	8	4.484	14540	0.0308391	810.3	109.7	0.1353	167629	1.94	1.975	26	21	65.5	21.5
Dr_P15_A	DR	P	29	9	5.053	14540	0.0347524	801.5	103.7	0.1294	165815	1.94	1.975	26	21	65.5	21.5
Dr_P15_A	DR	P	29	10	5.62	14540	0.038652	791.6	112.5	0.1422	163762	1.94	1.975	26	21	65.5	21.5
Dr_P15_A	DR	P	29	11	6.191	14540	0.0425791	787.5	109.5	0.139	162915	1.94	1.975	26	21	65.5	21.5
Dr_P15_A	DR	P	29	12	6.766	14540	0.0465337	773.7	117	0.1512	160057	1.94	1.975	26	21	65.5	21.5
Dr_P15_A	DR	P	29	13	7.329	14540	0.0504058	767.2	119.3	0.1555	158724	1.94	1.975	26	21	65.5	21.5
Dr_P15_A	DR	P	29	14	7.899	14540	0.054326	762	119.1	0.1563	157633	1.94	1.975	26	21	65.5	21.5
Dr_P15_A	DR	P	29	15	8.467	14540	0.0582325	752.9	117.6	0.1562	155749	1.94	1.975	26	21	65.5	21.5
Dr_P15_A	DR	P	29	16	9.035	14540	0.0621389	741.8	119.4	0.1609	153469	1.94	1.975	26	21	65.5	21.5
Dr_P15_A	DR	P	29	17	9.607	14540	0.0660729	733.7	122.2	0.1666	151782	1.94	1.975	26	21	65.5	21.5
Dr_P15_A	DR	P	29	18	10.18	14540	0.0700138	727	124.9	0.1717	150392	1.94	1.975	26	21	65.5	21.5
Dr_P15_A	DR	P	29	19	10.76	14540	0.0740028	719.4	128.2	0.1782	148818	1.94	1.975	26	21	65.5	21.5
Dr_P15_A	DR	P	29	20	11.31	14540	0.0777854	714.6	128.4	0.1797	147824	1.94	1.975	26	21	65.5	21.5
Dr_P15_A	DR	P	29	21	11.88	14540	0.0817056	709	128.3	0.1809	146678	1.94	1.975	26	21	65.5	21.5
Dr_P15_A	DR	P	29	22	12.45	14540	0.0856259	703.1	128	0.182	145455	1.94	1.975	26	21	65.5	21.5
Dr_P15_A	DR	P	29	23	13.02	14540	0.0895461	696.7	127.8	0.1835	144134	1.94	1.975	26	21	65.5	21.5
Dr_P15_A	DR	P	29	24	13.59	14540	0.0934663	690	128.3	0.186	142746	1.94	1.975	26	21	65.5	21.5
Dr_P15_A	DR	P	29	25	14.17	14540	0.0974553	682.2	128.9	0.1889	141121	1.94	1.975	26	21	65.5	21.5
Dr_P15_A	DR	P	29	26	14.73	14540	0.101307	677.3	130.8	0.1931	140112	1.94	1.975	26	21	65.5	21.5
Dr_P15_A	DR	P	29	27	15.3	14540	0.105227	673	132.3	0.1966	139220	1.94	1.975	26	21	65.5	21.5
Dr_P15_A	DR	P	29	28	15.87	14540	0.109147	669.2	133.3	0.1992	138447	1.94	1.975	26	21	65.5	21.5
Dr_P15_A	DR	P	29	29	16.43	14540	0.112999	665.6	133.7	0.2009	137688	1.94	1.975	26	21	65.5	21.5
Dr_P15_A	DR	P	29	30	17	14540	0.116919	661.7	133.7	0.202	136883	1.94	1.975	26	21	65.5	21.5
Dr_P15_B	DR	P	29	1	0.5	14590	0.003427	694	72.24	0.1041	90212	1.613	1.498	25	20	50	21.5
Dr_P15_B	DR	P	29	2	1.068	14590	0.00732008	682.3	78.04	0.1144	88698	1.613	1.498	25	20	50	21.5
Dr_P15_B	DR	P	29	3	1.635	14590	0.0112063	673	81.52	0.1211	87487	1.613	1.498	25	20	50	21.5
Dr_P15_B	DR	P	29	4	2.207	14590	0.0151268	666.7	72.34	0.1085	86664	1.613	1.498	25	20	50	21.5
Dr_P15_B	DR	P	29	5	2.777	14590	0.0190336	658.9	85.72	0.1301	85655	1.613	1.498	25	20	50	21.5
Dr_P15_B	DR	P	29	6	3.345	14590	0.0229267	652.2	77.29	0.1185	84780	1.613	1.498	25	20	50	21.5
Dr_P15_B	DR	P	29	7	3.913	14590	0.0268197	644.5	86.52	0.1342	83784	1.613	1.498	25	20	50	21.5
Dr_P15_B	DR	P	29	8	4.481	14590	0.0307128	641.6	81.11	0.1264	83411	1.613	1.498	25	20	50	21.5
Dr_P15_B	DR	P	29	9	5.048	14590	0.034599	635.3	88.18	0.1388	82586	1.613	1.498	25	20	50	21.5
Dr_P15_B	DR	P	29	10	5.62	14590	0.0385195	633.4	84.64	0.1336	82340	1.613	1.498	25	20	50	21.5
Dr_P15_B	DR	P	29	11	6.188	14590	0.0424126	626.1	89.73	0.1433	81390	1.613	1.498	25	20	50	21.5
Dr_P15_B	DR	P	29	12	6.761	14590	0.04634	625.3	89.95	0.1438	81292	1.613	1.498	25	20	50	21.5
Dr_P15_B	DR	P	29	13	7.328	14590	0.0502262	620.6	88.25	0.1422	80681	1.613	1.498	25	20	50	21.5
Dr_P15_B	DR	P	29	14	7.894	14590	0.0541056	612.8	90.77	0.1481	79667	1.613	1.498	25	20	50	21.5
Dr_P15_B	DR	P	29	15	8.466	14590	0.058026	610.8	94.33	0.1544	79401	1.613	1.498	25	20	50	21.5
Dr_P15_B	DR	P	29	16	9.033	14590	0.0619123	608.7	93.33	0.1533	79131	1.613	1.498	25	20	50	21.5
Dr_P15_B	DR	P	29	17	9.602	14590	0.0658122	605.1	93.29	0.1542	78663	1.613	1.498	25	20	50	21.5
Dr_P15_B	DR	P	29	18	10.17	14590	0.0697053	600.8	93.73	0.156	78096	1.613	1.498	25	20	50	21.5
Dr_P15_B	DR	P	29	19	10.74	14590	0.0736121	596.5	94.94	0.1592	77547	1.613	1.498	25	20	50	21.5
Dr_P15_B	DR	P	29	20	11.31	14590	0.0775188	592.7	96.69	0.1631	77055	1.613	1.498	25	20	50	21.5
Dr_P15_B	DR	P	29	21	11.88	14590	0.0814256	589.9	98.75	0.1674	76686	1.613	1.498	25	20	50	21.5
Dr_P15_B	DR	P	29	22	12.45	14590	0.0853324	588	100.8	0.1714	76441	1.613	1.498	25	20	50	21.5
Dr_P15_B	DR	P	29	23	13.02	14590	0.0892392	587.2	102	0.1736	76335	1.613	1.498	25	20	50	21.5
Dr_P15_B	DR	P	29	24	13.58	14590	0.0930775	586.3	102.5	0.1749	76214	1.613	1.498	25	20	50	21.5
Dr_P15_B	DR	P	29	25	14.15	14590	0.0969842	584.5	102.6	0.1755	75985	1.613	1.498	25	20	50	21.5
Dr_P15_B	DR	P	29	26	14.72	14590	0.100891	582.3	102.8	0.1765	75701	1.613	1.498	25	20	50	21.5
Dr_P15_B	DR	P	29	27	15.29	14590	0.104798	579.9	103.3	0.1781	75382	1.613	1.498	25	20	50	21.5
Dr_P15_B	DR	P	29	28	15.86	14590	0.108705	577.2	104.3	0.1807	75035	1.613	1.498	25	20	50	21.5
Dr_P15_B	DR	P	29	29	16.43	14590	0.112611	575.1	105.6	0.1836	74761	1.613	1.498	25	20	50	21.5
Dr_P15_B	DR	P	29	30	16.99	14590	0.11645	573.6	107.3	0.187	74573	1.613	1.498	25	20	50	21.5
Ed_C01_A	ED	C	30	1	0.5	14620	0.00341997	1567	142	0.09064	311916	1.933	1.918	31	26	90	26
Ed_C01_A	ED	C	30	2	1.069	14620	0.0073119	1553	159.1	0.1025	309071	1.933	1.918	31	26	90	26
Ed_C01_A	ED	C	30	3	1.634	14620	0.0111765	1518	169.7	0.1118	302179	1.933	1.918	31	26	90	26
Ed_C01_A	ED	C	30	4	2.206	14620	0.0150889	1491	162.4	0.1089	296796	1.933	1.918	31	26	90	26
Ed_C01_A	ED	C	30	5	2.777	14620	0.0189945	1481	166.6	0.1125	294868	1.933	1.918	31	26	90	26
Ed_C01_A	ED	C	30	6	3.346	14620	0.0228865	1447	188.4	0.1302	288035	1.933	1.918	31	26	90	26
Ed_C01_A	ED	C	30	7	3.914	14620	0.0267715	1423	175.7	0.1235	283268	1.933	1.918	31	26	90	26
Ed_C01_A	ED	C	30	8	4.485	14620	0.0306772	1401	195.2	0.1393	278963	1.933	1.918	31	26	90	26
Ed_C01_A	ED	C	30	9	5.057	14620	0.0345896	1386	183.6	0.1325	275879	1.933	1.918	31	26	90	26
Ed_C01_A	ED	C	30	10	5.62	14620	0.0384405	1358	198.8	0.1465	270241	1.933	1.918	31	26	90	26
Ed_C01_A	ED	C	30	11	6.193	14620	0.0423598	1347	192.8	0.1431	268164	1.933	1.918	31	26	90	26
Ed_C01_A	ED	C	30	12	6.761	14620	0.0462449	1319	194.8	0.1477	262607	1.933	1.918	31	26	90	26
Ed_C01_A	ED	C	30	13	7.33	14620	0.0501368	1308	204.3	0.1562	260298	1.933	1.918	31	26	90	26
Ed_C01_A	ED	C	30	14	7.906	14620	0.0540766	1297	200.6	0.1546	258261	1.933	1.918	31	26	90	26
Ed_C01_A	ED	C	30	15	8.468	14620	0.0579207	1275	198.7	0.1558	253848	1.933	1.918	31	26	90	26
Ed_C01_A	ED	C	30	16	9.038	14620	0.0618194	1255	206.4	0.1644	249874	1.933	1.918	31	26	90	26
Ed_C01_A	ED	C	30	17	9.611	14620	0.0657387	1245	209	0.1678	247913	1.933	1.918	31	26	90	26
Ed_C01_A	ED	C	30	18	10.18	14620	0.0696306	1231	211.4	0.1717	245072	1.933	1.918	31	26	90	26
Ed_C01_A	ED	C	30	19	10.75	14620	0.0735294	1220	210.9	0.173	242785	1.933	1.918	31	26	90	26
Ed_C01_A	ED	C	30	20	11.32	14620	0.0774282	1206	210.6	0.1746	240007	1.933	1.918	31	26	90	26
Ed_C01_A	ED	C	30	21	11.89	14620	0.0813269	1191	210.7	0.1769	237143	1.933	1.918	31	26	90	26
Ed_C01_A	ED	C	30	22	12.46	14620	0.0852257	1176	211	0.1795	234039	1.933	1.918	31	26	90	26
Ed_C01_A	ED	C	30	23	13.03	14620	0.0891245	1161	213.3	0.1838	231054	1.933	1.918	31	26	90	26
Ed_C01_A	ED	C	30	24	13.6	14620	0.0930233	1147	216.6	0.1888	228292	1.933	1.918	31	26	90	26
Ed_C01_A	ED	C	30	25	14.17	14620	0.096922	1135	220.9	0.1945	226024	1.933	1.918	31	26	90	26
Ed_C01_A	ED	C	30	26	14.75	14620	0.100889	1120	222.1	0.1983	222974	1.933	1.918	31	26	90	26
Ed_C01_A	ED	C	30	27	15.31	14620	0.10472	1107	223	0.2014	220441	1.933	1.918	31	26	90	26
Ed_C01_A	ED	C	30	28	15.87	14620	0.10855	1094	223.5	0.2042	217822	1.933	1.918	31	26	90	26
Ed_C01_A	ED	C	30	29	16.42	14620	0.112312	1083	223.8	0.2066	215661	1.933	1.918	31	26	90	26
Ed_C01_A	ED	C	30	30	17.01	14620	0.116347	1070	222.5	0.208	212918	1.933	1.918	31	26	90	26
Ed_C01_B	ED	C	30	1	0.5	14720	0.00339674	2097	185.5	0.08844	293648	1.638	1.603	31	26	86.5	26.5
Ed_C01_B	ED	C	30	2	1.069	14720	0.00726223	1998	197.5	0.09888	279725	1.638	1.603	31	26	86.5	26.5
Ed_C01_B	ED	C	30	3	1.637	14720	0.0111209	1955	211.4	0.1081	273750	1.638	1.603	31	26	86.5	26.5
Ed_C01_B	ED	C	30	4	2.205	14720	0.0149796	1927	207.6	0.1077	269819	1.638	1.603	31	26	86.5	26.5
Ed_C01_B	ED	C	30	5	2.777	14720	0.0188655	1904	204.8	0.1076	266559	1.638	1.603	31	26	86.5	26.5
Ed_C01_B	ED	C	30	6	3.347	14720	0.0227378	1880	233.8	0.1243	263248	1.638	1.603	31	26	86.5	26.5
Ed_C01_B	ED	C	30	7	3.915	14720	0.0265965	1837	221.8	0.1207	257272	1.638	1.603	31	26	86.5	26.5
Ed_C01_B	ED	C	30	8	4.485	14720	0.0304687	1822	242.2	0.1329	255116	1.638	1.603	31	26	86.5	26.5
Ed_C01_B	ED	C	30	9	5.054	14720	0.0343342	1792	229.9	0.1283	250899	1.638	1.603	31	26	86.5	26.5
Ed_C01_B	ED	C	30	10	5.62	14720	0.0381793	1763	250.4	0.142	246897	1.638	1.603	31	26	86.5	26.5
Ed_C01_B	ED	C	30	11	6.215	14720	0.0422215	1741	256.6	0.1474	243818	1.638	1.603	31	26	86.5	26.5
Ed_C01_B	ED	C	30	12	6.762	14720	0.0459375	1712	245	0.1431	239671	1.638	1.603	31	26	86.5	26.5
Ed_C01_B	ED	C	30	13	7.329	14720	0.0497894	1687	259.8	0.1539	236269	1.638	1.603	31	26	86.5	26.5
Ed_C01_B	ED	C	30	14	7.901	14720	0.0536753	1675	263.9	0.1576	234537	1.638	1.603	31	26	86.5	26.5
Ed_C01_B	ED	C	30	15	8.472	14720	0.0575543	1659	261.6	0.1577	232252	1.638	1.603	31	26	86.5	26.5
Ed_C01_B	ED	C	30	16	9.04	14720	0.061413	1633	259	0.1585	228725	1.638	1.603	31	26	86.5	26.5
Ed_C01_B	ED	C	30	17	9.609	14720	0.0652785	1611	263.3	0.1634	225572	1.638	1.603	31	26	86.5	26.5
Ed_C01_B	ED	C	30	18	10.18	14720	0.0691576	1591	268.1	0.1685	222750	1.638	1.603	31	26	86.5	26.5
Ed_C01_B	ED	C	30	19	10.75	14720	0.0730299	1575	273.3	0.1735	220568	1.638	1.603	31	26	86.5	26.5
Ed_C01_B	ED	C	30	20	11.32	14720	0.0769022	1561	277.2	0.1775	218645	1.638	1.603	31	26	86.5	26.5
Ed_C01_B	ED	C	30	21	11.89	14720	0.0807745	1548	278.7	0.18	216824	1.638	1.603	31	26	86.5	26.5
Ed_C01_B	ED	C	30	22	12.45	14720	0.0845788	1536	278.6	0.1814	215034	1.638	1.603	31	26	86.5	26.5
Ed_C01_B	ED	C	30	23	13.02	14720	0.0884511	1521	278	0.1827	213029	1.638	1.603	31	26	86.5	26.5
Ed_C01_B	ED	C	30	24	13.59	14720	0.0923234	1507	277	0.1838	210989	1.638	1.603	31	26	86.5	26.5
Ed_C01_B	ED	C	30	25	14.16	14720	0.0961957	1489	277.3	0.1862	208524	1.638	1.603	31	26	86.5	26.5
Ed_C01_B	ED	C	30	26	14.73	14720	0.100068	1476	279.3	0.1892	206694	1.638	1.603	31	26	86.5	26.5
Ed_C01_B	ED	C	30	27	15.3	14720	0.10394	1463	281.8	0.1925	204920	1.638	1.603	31	26	86.5	26.5
Ed_C01_B	ED	C	30	28	15.85	14720	0.107677	1454	285.4	0.1963	203613	1.638	1.603	31	26	86.5	26.5
Ed_C01_B	ED	C	30	29	16.44	14720	0.111685	1442	286.8	0.1989	201947	1.638	1.603	31	26	86.5	26.5
Ed_C01_B	ED	C	30	30	17	14720	0.115489	1434	286.8	0.2	200784	1.638	1.603	31	26	86.5	26.5
Ed_C03_A	ED	C	31	1	0.4999	14020	0.00356562	1604	153.4	0.09566	333252	1.905	1.948	28	23	89	23.5
Ed_C03_A	ED	C	31	2	1.069	14020	0.00762482	1562	153.4	0.0982	324587	1.905	1.948	28	23	89	23.5
Ed_C03_A	ED	C	31	3	1.637	14020	0.0116762	1532	157.3	0.1027	318303	1.905	1.948	28	23	89	23.5
Ed_C03_A	ED	C	31	4	2.209	14020	0.0157561	1513	173.2	0.1145	314381	1.905	1.948	28	23	89	23.5
Ed_C03_A	ED	C	31	5	2.764	14020	0.0197147	1473	192.9	0.131	306060	1.905	1.948	28	23	89	23.5
Ed_C03_A	ED	C	31	6	3.344	14020	0.0238516	1440	179.2	0.1244	299339	1.905	1.948	28	23	89	23.5
Ed_C03_A	ED	C	31	7	3.916	14020	0.0279315	1430	193.1	0.135	297120	1.905	1.948	28	23	89	23.5
Ed_C03_A	ED	C	31	8	4.483	14020	0.0319757	1396	186.9	0.1339	290087	1.905	1.948	28	23	89	23.5
Ed_C03_A	ED	C	31	9	5.055	14020	0.0360556	1378	204.4	0.1484	286342	1.905	1.948	28	23	89	23.5
Ed_C03_A	ED	C	31	10	5.622	14020	0.0400999	1359	193.9	0.1427	282418	1.905	1.948	28	23	89	23.5
Ed_C03_A	ED	C	31	11	6.192	14020	0.0441655	1336	207.2	0.1551	277579	1.905	1.948	28	23	89	23.5
Ed_C03_A	ED	C	31	12	6.763	14020	0.0482382	1323	207.3	0.1567	274932	1.905	1.948	28	23	89	23.5
Ed_C03_A	ED	C	31	13	7.332	14020	0.0522967	1304	202.3	0.1552	270924	1.905	1.948	28	23	89	23.5
Ed_C03_A	ED	C	31	14	7.902	14020	0.0563623	1277	206	0.1613	265406	1.905	1.948	28	23	89	23.5
Ed_C03_A	ED	C	31	15	8.47	14020	0.0604137	1267	213.5	0.1685	263264	1.905	1.948	28	23	89	23.5
Ed_C03_A	ED	C	31	16	9.04	14020	0.0644793	1255	212.2	0.1691	260816	1.905	1.948	28	23	89	23.5
Ed_C03_A	ED	C	31	17	9.607	14020	0.0685235	1239	210.8	0.1701	257478	1.905	1.948	28	23	89	23.5
Ed_C03_A	ED	C	31	18	10.18	14020	0.0726106	1222	210.3	0.1721	254019	1.905	1.948	28	23	89	23.5
Ed_C03_A	ED	C	31	19	10.75	14020	0.0766762	1207	211.9	0.1755	250872	1.905	1.948	28	23	89	23.5
Ed_C03_A	ED	C	31	20	11.32	14020	0.0807418	1193	214.5	0.1798	247939	1.905	1.948	28	23	89	23.5
Ed_C03_A	ED	C	31	21	11.9	14020	0.0848787	1178	217.9	0.185	244854	1.905	1.948	28	23	89	23.5
Ed_C03_A	ED	C	31	22	12.46	14020	0.088873	1169	220.3	0.1885	242908	1.905	1.948	28	23	89	23.5
Ed_C03_A	ED	C	31	23	13.03	14020	0.0929387	1160	221.3	0.1908	241030	1.905	1.948	28	23	89	23.5
Ed_C03_A	ED	C	31	24	13.59	14020	0.096933	1151	221.4	0.1924	239098	1.905	1.948	28	23	89	23.5
Ed_C03_A	ED	C	31	25	14.16	14020	0.100999	1141	221.2	0.1938	237135	1.905	1.948	28	23	89	23.5
Ed_C03_A	ED	C	31	26	14.73	14020	0.105064	1130	220.1	0.1947	234846	1.905	1.948	28	23	89	23.5
Ed_C03_A	ED	C	31	27	15.3	14020	0.10913	1118	219.6	0.1965	232287	1.905	1.948	28	23	89	23.5
Ed_C03_A	ED	C	31	28	15.89	14020	0.113338	1107	220.6	0.1993	230067	1.905	1.948	28	23	89	23.5
Ed_C03_A	ED	C	31	29	16.44	14020	0.117261	1097	221.9	0.2023	227931	1.905	1.948	28	23	89	23.5
Ed_C03_A	ED	C	31	30	17.01	14020	0.121327	1088	223.6	0.2056	225989	1.905	1.948	28	23	89	23.5
Ed_C03_B	ED	C	31	1	0.5	13760	0.00363372	1245	119.9	0.09634	322006	2.128	2.13	25	20	90.5	20.5
Ed_C03_B	ED	C	31	2	1.069	13760	0.00776889	1268	144.2	0.1137	328013	2.128	2.13	25	20	90.5	20.5
Ed_C03_B	ED	C	31	3	1.639	13760	0.0119113	1234	145.9	0.1183	319209	2.128	2.13	25	20	90.5	20.5
Ed_C03_B	ED	C	31	4	2.2	13760	0.0159884	1192	145.4	0.1219	308409	2.128	2.13	25	20	90.5	20.5
Ed_C03_B	ED	C	31	5	2.775	13760	0.0201672	1184	138.5	0.117	306196	2.128	2.13	25	20	90.5	20.5
Ed_C03_B	ED	C	31	6	3.347	13760	0.0243241	1172	148.2	0.1264	303305	2.128	2.13	25	20	90.5	20.5
Ed_C03_B	ED	C	31	7	3.916	13760	0.0284593	1140	149.7	0.1313	294872	2.128	2.13	25	20	90.5	20.5
Ed_C03_B	ED	C	31	8	4.485	13760	0.0325945	1134	155.1	0.1368	293310	2.128	2.13	25	20	90.5	20.5
Ed_C03_B	ED	C	31	9	5.05	13760	0.0367006	1106	154	0.1392	286177	2.128	2.13	25	20	90.5	20.5
Ed_C03_B	ED	C	31	10	5.627	13760	0.0408939	1097	164.8	0.1502	283819	2.128	2.13	25	20	90.5	20.5
Ed_C03_B	ED	C	31	11	6.192	13760	0.045	1080	157.2	0.1456	279396	2.128	2.13	25	20	90.5	20.5
Ed_C03_B	ED	C	31	12	6.758	13760	0.0491134	1059	165.3	0.1561	273968	2.128	2.13	25	20	90.5	20.5
Ed_C03_B	ED	C	31	13	7.333	13760	0.0532922	1052	166.6	0.1584	272179	2.128	2.13	25	20	90.5	20.5
Ed_C03_B	ED	C	31	14	7.896	13760	0.0573837	1038	162.9	0.1569	268592	2.128	2.13	25	20	90.5	20.5
Ed_C03_B	ED	C	31	15	8.47	13760	0.0615552	1020	162.9	0.1597	263903	2.128	2.13	25	20	90.5	20.5
Ed_C03_B	ED	C	31	16	9.037	13760	0.0656759	1007	169.7	0.1686	260418	2.128	2.13	25	20	90.5	20.5
Ed_C03_B	ED	C	31	17	9.612	13760	0.0698547	999.6	170.4	0.1704	258624	2.128	2.13	25	20	90.5	20.5
Ed_C03_B	ED	C	31	18	10.18	13760	0.0739826	987.9	171	0.1731	255583	2.128	2.13	25	20	90.5	20.5
Ed_C03_B	ED	C	31	19	10.75	13760	0.078125	979.5	170.1	0.1737	253418	2.128	2.13	25	20	90.5	20.5
Ed_C03_B	ED	C	31	20	11.31	13760	0.0821948	968.1	168.7	0.1743	250453	2.128	2.13	25	20	90.5	20.5
Ed_C03_B	ED	C	31	21	11.89	13760	0.0864099	956.4	168.5	0.1761	247441	2.128	2.13	25	20	90.5	20.5
Ed_C03_B	ED	C	31	22	12.46	13760	0.0905523	947	172.4	0.1821	245016	2.128	2.13	25	20	90.5	20.5
Ed_C03_B	ED	C	31	23	13.03	13760	0.0946948	935.4	170.7	0.1825	242008	2.128	2.13	25	20	90.5	20.5
Ed_C03_B	ED	C	31	24	13.6	13760	0.0988372	927.4	172.7	0.1862	239924	2.128	2.13	25	20	90.5	20.5
Ed_C03_B	ED	C	31	25	14.17	13760	0.10298	921	174.6	0.1895	238271	2.128	2.13	25	20	90.5	20.5
Ed_C03_B	ED	C	31	26	14.73	13760	0.107049	913.1	175	0.1916	236239	2.128	2.13	25	20	90.5	20.5
Ed_C03_B	ED	C	31	27	15.3	13760	0.111192	905.9	174.6	0.1927	234374	2.128	2.13	25	20	90.5	20.5
Ed_C03_B	ED	C	31	28	15.84	13760	0.115116	898.6	174.8	0.1945	232481	2.128	2.13	25	20	90.5	20.5
Ed_C03_B	ED	C	31	29	16.44	13760	0.119477	889.9	173.9	0.1955	230228	2.128	2.13	25	20	90.5	20.5
Ed_C03_B	ED	C	31	30	17.01	13760	0.123619	879.8	176.1	0.2002	227608	2.128	2.13	25	20	90.5	20.5
Ed_C04_A	ED	C	32	1	0.5	15280	0.00327225	1537	144.3	0.09387	365894	2.18	2.125	31	26	100.5	26.5
Ed_C04_A	ED	C	32	2	1.067	15280	0.00698298	1502	148.1	0.0986	357537	2.18	2.125	31	26	100.5	26.5
Ed_C04_A	ED	C	32	3	1.637	15280	0.0107134	1456	159.8	0.1097	346561	2.18	2.125	31	26	100.5	26.5
Ed_C04_A	ED	C	32	4	2.206	15280	0.0144372	1445	156.8	0.1085	343979	2.18	2.125	31	26	100.5	26.5
Ed_C04_A	ED	C	32	5	2.779	15280	0.0181872	1427	165.4	0.1159	339636	2.18	2.125	31	26	100.5	26.5
Ed_C04_A	ED	C	32	6	3.344	15280	0.0218848	1394	183.7	0.1317	331888	2.18	2.125	31	26	100.5	26.5
Ed_C04_A	ED	C	32	7	3.92	15280	0.0256544	1371	171.3	0.1249	326396	2.18	2.125	31	26	100.5	26.5
Ed_C04_A	ED	C	32	8	4.481	15280	0.0293259	1346	191.9	0.1426	320332	2.18	2.125	31	26	100.5	26.5
Ed_C04_A	ED	C	32	9	5.053	15280	0.0330694	1330	180.8	0.136	316585	2.18	2.125	31	26	100.5	26.5
Ed_C04_A	ED	C	32	10	5.622	15280	0.0367932	1303	193.3	0.1484	310067	2.18	2.125	31	26	100.5	26.5
Ed_C04_A	ED	C	32	11	6.187	15280	0.0404908	1296	195.7	0.151	308493	2.18	2.125	31	26	100.5	26.5
Ed_C04_A	ED	C	32	12	6.763	15280	0.0442605	1275	189.8	0.1489	303452	2.18	2.125	31	26	100.5	26.5
Ed_C04_A	ED	C	32	13	7.33	15280	0.0479712	1248	198.1	0.1587	297045	2.18	2.125	31	26	100.5	26.5
Ed_C04_A	ED	C	32	14	7.902	15280	0.0517147	1239	201.1	0.1623	294829	2.18	2.125	31	26	100.5	26.5
Ed_C04_A	ED	C	32	15	8.47	15280	0.0554319	1226	197.9	0.1614	291954	2.18	2.125	31	26	100.5	26.5
Ed_C04_A	ED	C	32	16	9.037	15280	0.0591427	1206	196.6	0.1629	287195	2.18	2.125	31	26	100.5	26.5
Ed_C04_A	ED	C	32	17	9.627	15280	0.0630039	1189	199.6	0.1678	283120	2.18	2.125	31	26	100.5	26.5
Ed_C04_A	ED	C	32	18	10.18	15280	0.066623	1178	203.6	0.1728	280376	2.18	2.125	31	26	100.5	26.5
Ed_C04_A	ED	C	32	19	10.74	15280	0.070288	1167	207	0.1774	277761	2.18	2.125	31	26	100.5	26.5
Ed_C04_A	ED	C	32	20	11.32	15280	0.0740838	1154	208.7	0.1808	274698	2.18	2.125	31	26	100.5	26.5
Ed_C04_A	ED	C	32	21	11.88	15280	0.0777487	1144	209	0.1827	272286	2.18	2.125	31	26	100.5	26.5
Ed_C04_A	ED	C	32	22	12.45	15280	0.0814791	1133	208.7	0.1843	269621	2.18	2.125	31	26	100.5	26.5
Ed_C04_A	ED	C	32	23	13.02	15280	0.0852094	1120	207.4	0.1851	266688	2.18	2.125	31	26	100.5	26.5
Ed_C04_A	ED	C	32	24	13.59	15280	0.0889398	1107	206.8	0.1867	263620	2.18	2.125	31	26	100.5	26.5
Ed_C04_A	ED	C	32	25	14.17	15280	0.0927356	1095	207.6	0.1896	260551	2.18	2.125	31	26	100.5	26.5
Ed_C04_A	ED	C	32	26	14.74	15280	0.096466	1083	209.1	0.1931	257708	2.18	2.125	31	26	100.5	26.5
Ed_C04_A	ED	C	32	27	15.31	15280	0.100196	1072	211.4	0.1972	255230	2.18	2.125	31	26	100.5	26.5
Ed_C04_A	ED	C	32	28	15.88	15280	0.103927	1062	213.3	0.2009	252775	2.18	2.125	31	26	100.5	26.5
Ed_C04_A	ED	C	32	29	16.45	15280	0.107657	1052	214.2	0.2036	250502	2.18	2.125	31	26	100.5	26.5
Ed_C04_A	ED	C	32	30	17.01	15280	0.111322	1042	214.8	0.2062	248014	2.18	2.125	31	26	100.5	26.5
Ed_C04_B	ED	C	32	1	0.5001	14240	0.00351194	1417	140.7	0.09929	274096	1.913	1.835	29	24	91	24
Ed_C04_B	ED	C	32	2	1.07	14240	0.00751404	1348	151.7	0.1125	260855	1.913	1.835	29	24	91	24
Ed_C04_B	ED	C	32	3	1.648	14240	0.011573	1304	151.8	0.1164	252322	1.913	1.835	29	24	91	24
Ed_C04_B	ED	C	32	4	2.206	14240	0.0154916	1292	162.3	0.1257	249945	1.913	1.835	29	24	91	24
Ed_C04_B	ED	C	32	5	2.773	14240	0.0194733	1266	154.2	0.1219	244876	1.913	1.835	29	24	91	24
Ed_C04_B	ED	C	32	6	3.347	14240	0.0235042	1258	160	0.1271	243495	1.913	1.835	29	24	91	24
Ed_C04_B	ED	C	32	7	3.911	14240	0.0274649	1227	174.2	0.1419	237441	1.913	1.835	29	24	91	24
Ed_C04_B	ED	C	32	8	4.485	14240	0.0314958	1214	165.2	0.1361	234831	1.913	1.835	29	24	91	24
Ed_C04_B	ED	C	32	9	5.038	14240	0.0353792	1194	179.4	0.1502	231007	1.913	1.835	29	24	91	24
Ed_C04_B	ED	C	32	10	5.623	14240	0.0394874	1180	179.2	0.1518	228378	1.913	1.835	29	24	91	24
Ed_C04_B	ED	C	32	11	6.191	14240	0.0434761	1160	174.2	0.1502	224397	1.913	1.835	29	24	91	24
Ed_C04_B	ED	C	32	12	6.792	14240	0.0476966	1137	184.6	0.1624	219920	1.913	1.835	29	24	91	24
Ed_C04_B	ED	C	32	13	7.33	14240	0.0514747	1131	186.5	0.1649	218836	1.913	1.835	29	24	91	24
Ed_C04_B	ED	C	32	14	7.9	14240	0.0554775	1118	183.4	0.1641	216265	1.913	1.835	29	24	91	24
Ed_C04_B	ED	C	32	15	8.469	14240	0.0594733	1098	181.9	0.1656	212501	1.913	1.835	29	24	91	24
Ed_C04_B	ED	C	32	16	9.036	14240	0.0634551	1082	190.8	0.1764	209265	1.913	1.835	29	24	91	24
Ed_C04_B	ED	C	32	17	9.613	14240	0.067507	1073	192.1	0.1791	207550	1.913	1.835	29	24	91	24
Ed_C04_B	ED	C	32	18	10.17	14240	0.0714185	1064	194	0.1824	205838	1.913	1.835	29	24	91	24
Ed_C04_B	ED	C	32	19	10.74	14240	0.0754213	1052	193.4	0.1839	203518	1.913	1.835	29	24	91	24
Ed_C04_B	ED	C	32	20	11.31	14240	0.0794242	1040	192.5	0.1851	201271	1.913	1.835	29	24	91	24
Ed_C04_B	ED	C	32	21	11.88	14240	0.083427	1028	192.5	0.1873	198940	1.913	1.835	29	24	91	24
Ed_C04_B	ED	C	32	22	12.46	14240	0.0875	1015	193	0.1901	196452	1.913	1.835	29	24	91	24
Ed_C04_B	ED	C	32	23	13.02	14240	0.0914326	1004	196.9	0.196	194338	1.913	1.835	29	24	91	24
Ed_C04_B	ED	C	32	24	13.6	14240	0.0955056	993.2	196.7	0.198	192166	1.913	1.835	29	24	91	24
Ed_C04_B	ED	C	32	25	14.17	14240	0.0995084	984.6	198.9	0.202	190506	1.913	1.835	29	24	91	24
Ed_C04_B	ED	C	32	26	14.74	14240	0.103511	977.1	200.4	0.2051	189055	1.913	1.835	29	24	91	24
Ed_C04_B	ED	C	32	27	15.3	14240	0.107444	969.3	200.5	0.2068	187545	1.913	1.835	29	24	91	24
Ed_C04_B	ED	C	32	28	15.87	14240	0.111447	961.9	200	0.2079	186111	1.913	1.835	29	24	91	24
Ed_C04_B	ED	C	32	29	16.44	14240	0.115449	954.4	199.2	0.2087	184673	1.913	1.835	29	24	91	24
Ed_C04_B	ED	C	32	30	17	14240	0.119382	945.7	198.5	0.2099	182991	1.913	1.835	29	24	91	24
Ed_C05_A	ED	C	33	1	0.5	14350	0.00348432	1074	112.7	0.1049	386739	2.57	2.56	31	26	105.5	26.5
Ed_C05_A	ED	C	33	2	1.07	14350	0.00745645	1056	121.4	0.1149	380379	2.57	2.56	31	26	105.5	26.5
Ed_C05_A	ED	C	33	3	1.638	14350	0.0114146	1028	125.4	0.1221	370078	2.57	2.56	31	26	105.5	26.5
Ed_C05_A	ED	C	33	4	2.206	14350	0.0153728	1007	123.2	0.1223	362489	2.57	2.56	31	26	105.5	26.5
Ed_C05_A	ED	C	33	5	2.778	14350	0.0193589	994.1	130.3	0.1311	357956	2.57	2.56	31	26	105.5	26.5
Ed_C05_A	ED	C	33	6	3.343	14350	0.0232962	966.3	141.4	0.1463	347952	2.57	2.56	31	26	105.5	26.5
Ed_C05_A	ED	C	33	7	3.914	14350	0.0272753	955.2	134.3	0.1406	343952	2.57	2.56	31	26	105.5	26.5
Ed_C05_A	ED	C	33	8	4.487	14350	0.0312683	935.2	146.8	0.157	336745	2.57	2.56	31	26	105.5	26.5
Ed_C05_A	ED	C	33	9	5.056	14350	0.0352334	921.2	138.7	0.1506	331701	2.57	2.56	31	26	105.5	26.5
Ed_C05_A	ED	C	33	10	5.62	14350	0.0391638	903.6	149.2	0.1651	325371	2.57	2.56	31	26	105.5	26.5
Ed_C05_A	ED	C	33	11	6.193	14350	0.0431568	892.9	143.6	0.1608	321525	2.57	2.56	31	26	105.5	26.5
Ed_C05_A	ED	C	33	12	6.763	14350	0.0471289	874	145.5	0.1665	314724	2.57	2.56	31	26	105.5	26.5
Ed_C05_A	ED	C	33	13	7.334	14350	0.051108	865.7	152.2	0.1758	311722	2.57	2.56	31	26	105.5	26.5
Ed_C05_A	ED	C	33	14	7.901	14350	0.0550592	857.1	150.2	0.1752	308623	2.57	2.56	31	26	105.5	26.5
Ed_C05_A	ED	C	33	15	8.47	14350	0.0590244	844.3	147.1	0.1742	304015	2.57	2.56	31	26	105.5	26.5
Ed_C05_A	ED	C	33	16	9.038	14350	0.0629826	829.1	151.9	0.1832	298550	2.57	2.56	31	26	105.5	26.5
Ed_C05_A	ED	C	33	17	9.613	14350	0.0669895	823	153.4	0.1864	296369	2.57	2.56	31	26	105.5	26.5
Ed_C05_A	ED	C	33	18	10.18	14350	0.0709408	814.9	154	0.189	293438	2.57	2.56	31	26	105.5	26.5
Ed_C05_A	ED	C	33	19	10.75	14350	0.0749129	805.6	153.3	0.1902	290090	2.57	2.56	31	26	105.5	26.5
Ed_C05_A	ED	C	33	20	11.32	14350	0.078885	796.1	153.4	0.1926	286671	2.57	2.56	31	26	105.5	26.5
Ed_C05_A	ED	C	33	21	11.88	14350	0.0827875	787.4	152.2	0.1932	283525	2.57	2.56	31	26	105.5	26.5
Ed_C05_A	ED	C	33	22	12.45	14350	0.0867596	777.6	153.3	0.1971	280016	2.57	2.56	31	26	105.5	26.5
Ed_C05_A	ED	C	33	23	13.03	14350	0.0908014	768.7	153.8	0.2	276807	2.57	2.56	31	26	105.5	26.5
Ed_C05_A	ED	C	33	24	13.61	14350	0.0948432	761	155.5	0.2044	274043	2.57	2.56	31	26	105.5	26.5
Ed_C05_A	ED	C	33	25	14.17	14350	0.0987456	753.6	157.3	0.2088	271360	2.57	2.56	31	26	105.5	26.5
Ed_C05_A	ED	C	33	26	14.74	14350	0.102718	746.7	158.4	0.2121	268897	2.57	2.56	31	26	105.5	26.5
Ed_C05_A	ED	C	33	27	15.3	14350	0.10662	739.9	158.8	0.2146	266419	2.57	2.56	31	26	105.5	26.5
Ed_C05_A	ED	C	33	28	15.87	14350	0.110592	731.9	158.8	0.2169	263567	2.57	2.56	31	26	105.5	26.5
Ed_C05_A	ED	C	33	29	16.44	14350	0.114564	724	158.7	0.2193	260704	2.57	2.56	31	26	105.5	26.5
Ed_C05_A	ED	C	33	30	17.01	14350	0.118537	715.6	158.3	0.2212	257697	2.57	2.56	31	26	105.5	26.5
Ed_C05_B	ED	C	33	1	0.4999	15300	0.00326732	1302	143.2	0.11	433296	2.54	2.553	30	25	101.5	25.5
Ed_C05_B	ED	C	33	2	1.071	15300	0.007	1240	149.1	0.1202	412768	2.54	2.553	30	25	101.5	25.5
Ed_C05_B	ED	C	33	3	1.639	15300	0.0107124	1209	152.4	0.1261	402369	2.54	2.553	30	25	101.5	25.5
Ed_C05_B	ED	C	33	4	2.206	15300	0.0144183	1175	169.8	0.1445	391040	2.54	2.553	30	25	101.5	25.5
Ed_C05_B	ED	C	33	5	2.773	15300	0.0181242	1149	156.3	0.136	382389	2.54	2.553	30	25	101.5	25.5
Ed_C05_B	ED	C	33	6	3.349	15300	0.0218889	1139	165.3	0.1451	379112	2.54	2.553	30	25	101.5	25.5
Ed_C05_B	ED	C	33	7	3.913	15300	0.0255752	1106	175.2	0.1584	367951	2.54	2.553	30	25	101.5	25.5
Ed_C05_B	ED	C	33	8	4.486	15300	0.0293203	1092	168.8	0.1545	363515	2.54	2.553	30	25	101.5	25.5
Ed_C05_B	ED	C	33	9	5.054	15300	0.0330327	1069	180.7	0.169	355710	2.54	2.553	30	25	101.5	25.5
Ed_C05_B	ED	C	33	10	5.624	15300	0.0367582	1058	174.8	0.1653	351891	2.54	2.553	30	25	101.5	25.5
Ed_C05_B	ED	C	33	11	6.193	15300	0.0404771	1035	182.8	0.1767	344416	2.54	2.553	30	25	101.5	25.5
Ed_C05_B	ED	C	33	12	6.761	15300	0.0441895	1028	182.4	0.1775	341948	2.54	2.553	30	25	101.5	25.5
Ed_C05_B	ED	C	33	13	7.331	15300	0.047915	1011	178.7	0.1767	336565	2.54	2.553	30	25	101.5	25.5
Ed_C05_B	ED	C	33	14	7.896	15300	0.0516078	992.2	185.2	0.1866	330145	2.54	2.553	30	25	101.5	25.5
Ed_C05_B	ED	C	33	15	8.468	15300	0.0553464	985.3	187.1	0.1899	327851	2.54	2.553	30	25	101.5	25.5
Ed_C05_B	ED	C	33	16	9.037	15300	0.0590654	976	185.2	0.1897	324778	2.54	2.553	30	25	101.5	25.5
Ed_C05_B	ED	C	33	17	9.608	15300	0.0627974	963.7	183.7	0.1906	320668	2.54	2.553	30	25	101.5	25.5
Ed_C05_B	ED	C	33	18	10.18	15300	0.0665359	951.4	183.9	0.1933	316570	2.54	2.553	30	25	101.5	25.5
Ed_C05_B	ED	C	33	19	10.75	15300	0.0702614	939.4	185.3	0.1973	312600	2.54	2.553	30	25	101.5	25.5
Ed_C05_B	ED	C	33	20	11.32	15300	0.0739869	928.6	186.5	0.2009	309005	2.54	2.553	30	25	101.5	25.5
Ed_C05_B	ED	C	33	21	11.89	15300	0.0777124	919.7	188.9	0.2054	306022	2.54	2.553	30	25	101.5	25.5
Ed_C05_B	ED	C	33	22	12.46	15300	0.0814379	911.5	190.6	0.2091	303303	2.54	2.553	30	25	101.5	25.5
Ed_C05_B	ED	C	33	23	13.02	15300	0.085098	904.2	190.9	0.2112	300866	2.54	2.553	30	25	101.5	25.5
Ed_C05_B	ED	C	33	24	13.59	15300	0.0888235	896.3	190.7	0.2128	298254	2.54	2.553	30	25	101.5	25.5
Ed_C05_B	ED	C	33	25	14.16	15300	0.092549	888.1	190.2	0.2142	295516	2.54	2.553	30	25	101.5	25.5
Ed_C05_B	ED	C	33	26	14.73	15300	0.0962745	879.4	189.8	0.2159	292612	2.54	2.553	30	25	101.5	25.5
Ed_C05_B	ED	C	33	27	15.3	15300	0.1	868.6	190.2	0.219	289010	2.54	2.553	30	25	101.5	25.5
Ed_C05_B	ED	C	33	28	15.87	15300	0.103725	860.1	191.7	0.2229	286182	2.54	2.553	30	25	101.5	25.5
Ed_C05_B	ED	C	33	29	16.45	15300	0.107516	850.1	192.7	0.2267	282861	2.54	2.553	30	25	101.5	25.5
Ed_C05_B	ED	C	33	30	17.02	15300	0.111242	842	194.1	0.2306	280166	2.54	2.553	30	25	101.5	25.5
Ed_C06_A	ED	C	34	1	0.5001	14300	0.0034972	1282	117.9	0.092	411668	2.458	2.38	30	25	103.5	25.5
Ed_C06_A	ED	C	34	2	1.07	14300	0.00748252	1306	132.9	0.1018	419333	2.458	2.38	30	25	103.5	25.5
Ed_C06_A	ED	C	34	3	1.64	14300	0.0114685	1265	132.3	0.1045	406373	2.458	2.38	30	25	103.5	25.5
Ed_C06_A	ED	C	34	4	2.209	14300	0.0154476	1234	147.7	0.1197	396131	2.458	2.38	30	25	103.5	25.5
Ed_C06_A	ED	C	34	5	2.775	14300	0.0194056	1191	155.4	0.1305	382528	2.458	2.38	30	25	103.5	25.5
Ed_C06_A	ED	C	34	6	3.344	14300	0.0233846	1170	148.4	0.1268	375736	2.458	2.38	30	25	103.5	25.5
Ed_C06_A	ED	C	34	7	3.918	14300	0.0273986	1143	166.4	0.1457	366926	2.458	2.38	30	25	103.5	25.5
Ed_C06_A	ED	C	34	8	4.483	14300	0.0313496	1122	156.9	0.1398	360396	2.458	2.38	30	25	103.5	25.5
Ed_C06_A	ED	C	34	9	5.054	14300	0.0353427	1102	170.4	0.1545	354003	2.458	2.38	30	25	103.5	25.5
Ed_C06_A	ED	C	34	10	5.621	14300	0.0393077	1080	161.8	0.1499	346778	2.458	2.38	30	25	103.5	25.5
Ed_C06_A	ED	C	34	11	6.192	14300	0.0433007	1062	173.8	0.1636	341008	2.458	2.38	30	25	103.5	25.5
Ed_C06_A	ED	C	34	12	6.764	14300	0.0473007	1052	172.2	0.1638	337715	2.458	2.38	30	25	103.5	25.5
Ed_C06_A	ED	C	34	13	7.332	14300	0.0512727	1034	167.9	0.1624	332135	2.458	2.38	30	25	103.5	25.5
Ed_C06_A	ED	C	34	14	7.904	14300	0.0552727	1013	171.6	0.1694	325239	2.458	2.38	30	25	103.5	25.5
Ed_C06_A	ED	C	34	15	8.468	14300	0.0592168	1006	176.2	0.1752	322903	2.458	2.38	30	25	103.5	25.5
Ed_C06_A	ED	C	34	16	9.037	14300	0.0631958	995.9	174.6	0.1753	319788	2.458	2.38	30	25	103.5	25.5
Ed_C06_A	ED	C	34	17	9.607	14300	0.0671818	983	172.1	0.1751	315645	2.458	2.38	30	25	103.5	25.5
Ed_C06_A	ED	C	34	18	10.18	14300	0.0711888	970.2	172.1	0.1774	311535	2.458	2.38	30	25	103.5	25.5
Ed_C06_A	ED	C	34	19	10.75	14300	0.0751748	957.6	172.7	0.1803	307496	2.458	2.38	30	25	103.5	25.5
Ed_C06_A	ED	C	34	20	11.33	14300	0.0792308	946.6	174.4	0.1842	303969	2.458	2.38	30	25	103.5	25.5
Ed_C06_A	ED	C	34	21	11.89	14300	0.0831469	937.3	176.1	0.1879	301000	2.458	2.38	30	25	103.5	25.5
Ed_C06_A	ED	C	34	22	12.46	14300	0.0871329	928.9	177.9	0.1915	298290	2.458	2.38	30	25	103.5	25.5
Ed_C06_A	ED	C	34	23	13.02	14300	0.091049	921.9	177.7	0.1928	296049	2.458	2.38	30	25	103.5	25.5
Ed_C06_A	ED	C	34	24	13.59	14300	0.095035	914.2	177.4	0.1941	293552	2.458	2.38	30	25	103.5	25.5
Ed_C06_A	ED	C	34	25	14.16	14300	0.099021	906.8	176.2	0.1944	291184	2.458	2.38	30	25	103.5	25.5
Ed_C06_A	ED	C	34	26	14.73	14300	0.103007	898	175.9	0.1959	288364	2.458	2.38	30	25	103.5	25.5
Ed_C06_A	ED	C	34	27	15.3	14300	0.106993	890	174.4	0.1959	285785	2.458	2.38	30	25	103.5	25.5
Ed_C06_A	ED	C	34	28	15.87	14300	0.110979	881.8	175.7	0.1992	283152	2.458	2.38	30	25	103.5	25.5
Ed_C06_A	ED	C	34	29	16.44	14300	0.114965	873.8	175.8	0.2012	280596	2.458	2.38	30	25	103.5	25.5
Ed_C06_A	ED	C	34	30	17.01	14300	0.118951	866.7	177	0.2042	278301	2.458	2.38	30	25	103.5	25.5
Ed_C06_B	ED	C	34	1	0.5002	14410	0.0034712	1306	126.2	0.0966	386796	2.308	2.355	28	23	96.5	23.5
Ed_C06_B	ED	C	34	2	1.067	14410	0.00740458	1226	127.9	0.1044	362967	2.308	2.355	28	23	96.5	23.5
Ed_C06_B	ED	C	34	3	1.635	14410	0.0113463	1205	131.9	0.1095	356778	2.308	2.355	28	23	96.5	23.5
Ed_C06_B	ED	C	34	4	2.207	14410	0.0153158	1191	132.5	0.1112	352800	2.308	2.355	28	23	96.5	23.5
Ed_C06_B	ED	C	34	5	2.78	14410	0.0192922	1178	147.1	0.1249	348824	2.308	2.355	28	23	96.5	23.5
Ed_C06_B	ED	C	34	6	3.344	14410	0.0232061	1138	153.7	0.135	337062	2.308	2.355	28	23	96.5	23.5
Ed_C06_B	ED	C	34	7	3.916	14410	0.0271756	1127	148.8	0.132	333827	2.308	2.355	28	23	96.5	23.5
Ed_C06_B	ED	C	34	8	4.483	14410	0.0311103	1100	162.1	0.1474	325718	2.308	2.355	28	23	96.5	23.5
Ed_C06_B	ED	C	34	9	5.055	14410	0.0350798	1088	154.9	0.1424	322087	2.308	2.355	28	23	96.5	23.5
Ed_C06_B	ED	C	34	10	5.622	14410	0.0390146	1061	164.2	0.1548	314250	2.308	2.355	28	23	96.5	23.5
Ed_C06_B	ED	C	34	11	6.194	14410	0.042984	1052	160.6	0.1526	311612	2.308	2.355	28	23	96.5	23.5
Ed_C06_B	ED	C	34	12	6.761	14410	0.0469188	1030	159.9	0.1553	304995	2.308	2.355	28	23	96.5	23.5
Ed_C06_B	ED	C	34	13	7.33	14410	0.0508675	1016	168.2	0.1655	300898	2.308	2.355	28	23	96.5	23.5
Ed_C06_B	ED	C	34	14	7.899	14410	0.0548161	1007	168	0.1668	298279	2.308	2.355	28	23	96.5	23.5
Ed_C06_B	ED	C	34	15	8.472	14410	0.0587925	993.8	164.4	0.1654	294319	2.308	2.355	28	23	96.5	23.5
Ed_C06_B	ED	C	34	16	9.039	14410	0.0627273	977.4	163.7	0.1675	289459	2.308	2.355	28	23	96.5	23.5
Ed_C06_B	ED	C	34	17	9.609	14410	0.0666829	964.6	166.1	0.1722	285653	2.308	2.355	28	23	96.5	23.5
Ed_C06_B	ED	C	34	18	10.19	14410	0.0707148	953	168.7	0.177	282232	2.308	2.355	28	23	96.5	23.5
Ed_C06_B	ED	C	34	19	10.75	14410	0.074601	943.9	170.8	0.181	279523	2.308	2.355	28	23	96.5	23.5
Ed_C06_B	ED	C	34	20	11.32	14410	0.0785566	935.4	172	0.1839	277023	2.308	2.355	28	23	96.5	23.5
Ed_C06_B	ED	C	34	21	11.88	14410	0.0824427	927.3	171.7	0.1851	274618	2.308	2.355	28	23	96.5	23.5
Ed_C06_B	ED	C	34	22	12.45	14410	0.0863983	918.1	170.9	0.1862	271906	2.308	2.355	28	23	96.5	23.5
Ed_C06_B	ED	C	34	23	13.02	14410	0.0903539	908.2	169.4	0.1865	268962	2.308	2.355	28	23	96.5	23.5
Ed_C06_B	ED	C	34	24	13.59	14410	0.0943095	898	168.6	0.1878	265936	2.308	2.355	28	23	96.5	23.5
Ed_C06_B	ED	C	34	25	14.17	14410	0.0983345	887.7	169.3	0.1908	262881	2.308	2.355	28	23	96.5	23.5
Ed_C06_B	ED	C	34	26	14.74	14410	0.10229	878.2	170.4	0.194	260066	2.308	2.355	28	23	96.5	23.5
Ed_C06_B	ED	C	34	27	15.31	14410	0.106246	870	171.9	0.1976	257646	2.308	2.355	28	23	96.5	23.5
Ed_C06_B	ED	C	34	28	15.88	14410	0.110201	862.4	173.1	0.2007	255388	2.308	2.355	28	23	96.5	23.5
Ed_C06_B	ED	C	34	29	16.44	14410	0.114087	855.5	173.4	0.2026	253347	2.308	2.355	28	23	96.5	23.5
Ed_C06_B	ED	C	34	30	17.01	14410	0.118043	848.4	173.2	0.2042	251256	2.308	2.355	28	23	96.5	23.5
Ed_C08_A	ED	C	35	1	0.5001	14470	0.00345612	1170	115.4	0.09866	336972	2.303	2.305	30	25	101.5	25.5
Ed_C08_A	ED	C	35	2	1.068	14470	0.00738079	1125	123.5	0.1098	324008	2.303	2.305	30	25	101.5	25.5
Ed_C08_A	ED	C	35	3	1.635	14470	0.0112992	1106	129	0.1166	318756	2.303	2.305	30	25	101.5	25.5
Ed_C08_A	ED	C	35	4	2.204	14470	0.0152315	1082	125.2	0.1157	311872	2.303	2.305	30	25	101.5	25.5
Ed_C08_A	ED	C	35	5	2.777	14470	0.0191914	1077	128.6	0.1194	310297	2.303	2.305	30	25	101.5	25.5
Ed_C08_A	ED	C	35	6	3.345	14470	0.0231168	1051	144.8	0.1378	302918	2.303	2.305	30	25	101.5	25.5
Ed_C08_A	ED	C	35	7	3.917	14470	0.0270698	1034	134.4	0.13	297923	2.303	2.305	30	25	101.5	25.5
Ed_C08_A	ED	C	35	8	4.482	14470	0.0309744	1018	148.9	0.1462	293426	2.303	2.305	30	25	101.5	25.5
Ed_C08_A	ED	C	35	9	5.054	14470	0.0349274	1008	140.4	0.1393	290336	2.303	2.305	30	25	101.5	25.5
Ed_C08_A	ED	C	35	10	5.624	14470	0.0388666	986.6	150.5	0.1525	284279	2.303	2.305	30	25	101.5	25.5
Ed_C08_A	ED	C	35	11	6.192	14470	0.042792	979.9	145.5	0.1485	282340	2.303	2.305	30	25	101.5	25.5
Ed_C08_A	ED	C	35	12	6.76	14470	0.0467173	962.1	151.1	0.157	277217	2.303	2.305	30	25	101.5	25.5
Ed_C08_A	ED	C	35	13	7.33	14470	0.0506565	949.7	153.6	0.1617	273626	2.303	2.305	30	25	101.5	25.5
Ed_C08_A	ED	C	35	14	7.898	14470	0.0545819	943.2	151.8	0.1609	271763	2.303	2.305	30	25	101.5	25.5
Ed_C08_A	ED	C	35	15	8.469	14470	0.058528	930.8	148.1	0.1591	268177	2.303	2.305	30	25	101.5	25.5
Ed_C08_A	ED	C	35	16	9.036	14470	0.0624464	916.7	148.6	0.1621	264121	2.303	2.305	30	25	101.5	25.5
Ed_C08_A	ED	C	35	17	9.611	14470	0.0664202	906.3	151.2	0.1668	261141	2.303	2.305	30	25	101.5	25.5
Ed_C08_A	ED	C	35	18	10.18	14470	0.0703525	898.9	153.6	0.1708	259007	2.303	2.305	30	25	101.5	25.5
Ed_C08_A	ED	C	35	19	10.75	14470	0.0742916	891.6	154.9	0.1738	256902	2.303	2.305	30	25	101.5	25.5
Ed_C08_A	ED	C	35	20	11.32	14470	0.0782308	884.9	155	0.1752	254974	2.303	2.305	30	25	101.5	25.5
Ed_C08_A	ED	C	35	21	11.88	14470	0.0821009	876.6	155.4	0.1772	252580	2.303	2.305	30	25	101.5	25.5
Ed_C08_A	ED	C	35	22	12.45	14470	0.0860401	870.4	153.5	0.1763	250793	2.303	2.305	30	25	101.5	25.5
Ed_C08_A	ED	C	35	23	13.02	14470	0.0899793	862.2	152.2	0.1766	248436	2.303	2.305	30	25	101.5	25.5
Ed_C08_A	ED	C	35	24	13.59	14470	0.0939185	853.9	152.3	0.1783	246021	2.303	2.305	30	25	101.5	25.5
Ed_C08_A	ED	C	35	25	14.16	14470	0.0978576	846	152.9	0.1807	243758	2.303	2.305	30	25	101.5	25.5
Ed_C08_A	ED	C	35	26	14.73	14470	0.101797	839.1	154.2	0.1838	241782	2.303	2.305	30	25	101.5	25.5
Ed_C08_A	ED	C	35	27	15.3	14470	0.105736	833.2	155.6	0.1868	240066	2.303	2.305	30	25	101.5	25.5
Ed_C08_A	ED	C	35	28	15.87	14470	0.109675	828.1	156.4	0.1888	238588	2.303	2.305	30	25	101.5	25.5
Ed_C08_A	ED	C	35	29	16.43	14470	0.113545	823.1	157.2	0.191	237167	2.303	2.305	30	25	101.5	25.5
Ed_C08_A	ED	C	35	30	17	14470	0.117484	817.3	156.3	0.1913	235497	2.303	2.305	30	25	101.5	25.5
Ed_C08_B	ED	C	35	1	0.4999	15330	0.00326093	1232	120.1	0.09748	345983	2.348	2.335	30	25	100	25
Ed_C08_B	ED	C	35	2	1.068	15330	0.00696673	1194	127.8	0.1071	335222	2.348	2.335	30	25	100	25
Ed_C08_B	ED	C	35	3	1.637	15330	0.0106784	1178	137	0.1163	330807	2.348	2.335	30	25	100	25
Ed_C08_B	ED	C	35	4	2.205	15330	0.0143836	1158	132.3	0.1142	325262	2.348	2.335	30	25	100	25
Ed_C08_B	ED	C	35	5	2.779	15330	0.0181279	1147	135.2	0.1179	322109	2.348	2.335	30	25	100	25
Ed_C08_B	ED	C	35	6	3.346	15330	0.0218265	1122	152.9	0.1363	314970	2.348	2.335	30	25	100	25
Ed_C08_B	ED	C	35	7	3.911	15330	0.0255121	1102	141.8	0.1288	309268	2.348	2.335	30	25	100	25
Ed_C08_B	ED	C	35	8	4.485	15330	0.0292564	1085	158.9	0.1465	304537	2.348	2.335	30	25	100	25
Ed_C08_B	ED	C	35	9	5.055	15330	0.0329746	1072	150.2	0.1401	300870	2.348	2.335	30	25	100	25
Ed_C08_B	ED	C	35	10	5.622	15330	0.0366732	1049	160.4	0.1529	294608	2.348	2.335	30	25	100	25
Ed_C08_B	ED	C	35	11	6.194	15330	0.0404044	1040	155.8	0.1497	292087	2.348	2.335	30	25	100	25
Ed_C08_B	ED	C	35	12	6.758	15330	0.0440835	1021	156.5	0.1533	286536	2.348	2.335	30	25	100	25
Ed_C08_B	ED	C	35	13	7.33	15330	0.0478147	1009	163.5	0.162	283383	2.348	2.335	30	25	100	25
Ed_C08_B	ED	C	35	14	7.875	15330	0.0513699	1001	163.2	0.1629	281174	2.348	2.335	30	25	100	25
Ed_C08_B	ED	C	35	15	8.471	15330	0.0552577	987.3	159	0.161	277208	2.348	2.335	30	25	100	25
Ed_C08_B	ED	C	35	16	9.04	15330	0.0589693	971.2	159.4	0.1641	272682	2.348	2.335	30	25	100	25
Ed_C08_B	ED	C	35	17	9.609	15330	0.062681	959.4	161.9	0.1687	269377	2.348	2.335	30	25	100	25
Ed_C08_B	ED	C	35	18	10.18	15330	0.0664057	950.4	164.2	0.1728	266846	2.348	2.335	30	25	100	25
Ed_C08_B	ED	C	35	19	10.75	15330	0.0701239	941.1	165.8	0.1761	264221	2.348	2.335	30	25	100	25
Ed_C08_B	ED	C	35	20	11.32	15330	0.0738421	933.5	166	0.1778	262102	2.348	2.335	30	25	100	25
Ed_C08_B	ED	C	35	21	11.88	15330	0.0774951	925.4	165.5	0.1789	259813	2.348	2.335	30	25	100	25
Ed_C08_B	ED	C	35	22	12.45	15330	0.0812133	916.9	163.6	0.1785	257426	2.348	2.335	30	25	100	25
Ed_C08_B	ED	C	35	23	13.02	15330	0.0849315	908	162.2	0.1786	254938	2.348	2.335	30	25	100	25
Ed_C08_B	ED	C	35	24	13.59	15330	0.0886497	898.9	161.9	0.18	252394	2.348	2.335	30	25	100	25
Ed_C08_B	ED	C	35	25	14.17	15330	0.0924331	889.4	161.7	0.1818	249717	2.348	2.335	30	25	100	25
Ed_C08_B	ED	C	35	26	14.74	15330	0.0961513	882.5	163.1	0.1848	247776	2.348	2.335	30	25	100	25
Ed_C08_B	ED	C	35	27	15.3	15330	0.0998043	876.1	164.3	0.1875	245982	2.348	2.335	30	25	100	25
Ed_C08_B	ED	C	35	28	15.87	15330	0.103523	870.6	165	0.1895	244425	2.348	2.335	30	25	100	25
Ed_C08_B	ED	C	35	29	16.44	15330	0.107241	865.6	165.4	0.1911	243021	2.348	2.335	30	25	100	25
Ed_C08_B	ED	C	35	30	17.01	15330	0.110959	859.8	164.8	0.1917	241404	2.348	2.335	30	25	100	25
Ed_C09_A	ED	C	36	1	0.5	15480	0.00322997	1322	128.8	0.09744	363139	2.295	2.36	30	25	100.5	25
Ed_C09_A	ED	C	36	2	1.069	15480	0.00690568	1319	144.1	0.1093	362290	2.295	2.36	30	25	100.5	25
Ed_C09_A	ED	C	36	3	1.638	15480	0.0105814	1296	154.4	0.1192	356061	2.295	2.36	30	25	100.5	25
Ed_C09_A	ED	C	36	4	2.206	15480	0.0142506	1267	144.7	0.1142	348101	2.295	2.36	30	25	100.5	25
Ed_C09_A	ED	C	36	5	2.778	15480	0.0179457	1260	146.8	0.1166	346053	2.295	2.36	30	25	100.5	25
Ed_C09_A	ED	C	36	6	3.346	15480	0.021615	1231	166.4	0.1352	338069	2.295	2.36	30	25	100.5	25
Ed_C09_A	ED	C	36	7	3.915	15480	0.0252907	1212	154.8	0.1278	332881	2.295	2.36	30	25	100.5	25
Ed_C09_A	ED	C	36	8	4.483	15480	0.0289599	1193	173.7	0.1455	327857	2.295	2.36	30	25	100.5	25
Ed_C09_A	ED	C	36	9	5.054	15480	0.0326486	1179	163.3	0.1384	324008	2.295	2.36	30	25	100.5	25
Ed_C09_A	ED	C	36	10	5.621	15480	0.0363114	1156	176.1	0.1524	317531	2.295	2.36	30	25	100.5	25
Ed_C09_A	ED	C	36	11	6.193	15480	0.0400065	1145	170.7	0.149	314602	2.295	2.36	30	25	100.5	25
Ed_C09_A	ED	C	36	12	6.762	15480	0.0436822	1121	173.4	0.1547	307999	2.295	2.36	30	25	100.5	25
Ed_C09_A	ED	C	36	13	7.332	15480	0.0473643	1111	181.9	0.1636	305320	2.295	2.36	30	25	100.5	25
Ed_C09_A	ED	C	36	14	7.902	15480	0.0510465	1100	179.7	0.1633	302330	2.295	2.36	30	25	100.5	25
Ed_C09_A	ED	C	36	15	8.469	15480	0.0547093	1080	179.9	0.1665	296840	2.295	2.36	30	25	100.5	25
Ed_C09_A	ED	C	36	16	9.047	15480	0.0584432	1062	188.7	0.1778	291641	2.295	2.36	30	25	100.5	25
Ed_C09_A	ED	C	36	17	9.613	15480	0.0620995	1052	191.5	0.1821	288967	2.295	2.36	30	25	100.5	25
Ed_C09_A	ED	C	36	18	10.18	15480	0.0657623	1042	191.8	0.1841	286154	2.295	2.36	30	25	100.5	25
Ed_C09_A	ED	C	36	19	10.74	15480	0.0693798	1028	194.4	0.189	282550	2.295	2.36	30	25	100.5	25
Ed_C09_A	ED	C	36	20	11.31	15480	0.073062	1016	194.8	0.1917	279107	2.295	2.36	30	25	100.5	25
Ed_C09_A	ED	C	36	21	11.88	15480	0.0767442	1003	195	0.1944	275589	2.295	2.36	30	25	100.5	25
Ed_C09_A	ED	C	36	22	12.46	15480	0.080491	989.8	196.5	0.1985	271925	2.295	2.36	30	25	100.5	25
Ed_C09_A	ED	C	36	23	13.03	15480	0.0841731	976.4	200.1	0.2049	268238	2.295	2.36	30	25	100.5	25
Ed_C09_A	ED	C	36	24	13.61	15480	0.0879199	962.4	202.7	0.2106	264398	2.295	2.36	30	25	100.5	25
Ed_C09_A	ED	C	36	25	14.18	15480	0.0916021	950.1	205.1	0.2158	261028	2.295	2.36	30	25	100.5	25
Ed_C09_A	ED	C	36	26	14.74	15480	0.0952196	941.1	206.9	0.2198	258561	2.295	2.36	30	25	100.5	25
Ed_C09_A	ED	C	36	27	15.3	15480	0.0988372	932.2	207.5	0.2226	256119	2.295	2.36	30	25	100.5	25
Ed_C09_A	ED	C	36	28	15.86	15480	0.102455	923.2	207.5	0.2248	253639	2.295	2.36	30	25	100.5	25
Ed_C09_A	ED	C	36	29	16.42	15480	0.106072	914.8	207.2	0.2265	251327	2.295	2.36	30	25	100.5	25
Ed_C09_A	ED	C	36	30	17	15480	0.109819	906.3	206.7	0.228	248984	2.295	2.36	30	25	100.5	25
Ed_C09_B	ED	C	36	1	0.5	15130	0.00330469	1294	126.1	0.09745	344596	2.265	2.265	24	19	91	19
Ed_C09_B	ED	C	36	2	1.07	15130	0.00707204	1292	129.2	0.1	344009	2.265	2.265	24	19	91	19
Ed_C09_B	ED	C	36	3	1.633	15130	0.0107931	1243	136.1	0.1094	331084	2.265	2.265	24	19	91	19
Ed_C09_B	ED	C	36	4	2.207	15130	0.0145869	1236	139.3	0.1127	329206	2.265	2.265	24	19	91	19
Ed_C09_B	ED	C	36	5	2.78	15130	0.0183741	1220	151.2	0.124	324934	2.265	2.265	24	19	91	19
Ed_C09_B	ED	C	36	6	3.349	15130	0.0221348	1185	165.6	0.1397	315707	2.265	2.265	24	19	91	19
Ed_C09_B	ED	C	36	7	3.914	15130	0.0258691	1171	152.4	0.1301	311883	2.265	2.265	24	19	91	19
Ed_C09_B	ED	C	36	8	4.483	15130	0.0296299	1152	168.6	0.1464	306663	2.265	2.265	24	19	91	19
Ed_C09_B	ED	C	36	9	5.056	15130	0.0334171	1139	159.9	0.1404	303307	2.265	2.265	24	19	91	19
Ed_C09_B	ED	C	36	10	5.62	15130	0.0371447	1115	170.7	0.1531	296984	2.265	2.265	24	19	91	19
Ed_C09_B	ED	C	36	11	6.193	15130	0.0409319	1106	166	0.1501	294640	2.265	2.265	24	19	91	19
Ed_C09_B	ED	C	36	12	6.76	15130	0.0446794	1083	166.3	0.1536	288368	2.265	2.265	24	19	91	19
Ed_C09_B	ED	C	36	13	7.328	15130	0.0484336	1073	174.6	0.1628	285644	2.265	2.265	24	19	91	19
Ed_C09_B	ED	C	36	14	7.9	15130	0.0522141	1063	174.2	0.1639	283066	2.265	2.265	24	19	91	19
Ed_C09_B	ED	C	36	15	8.472	15130	0.0559947	1048	170.5	0.1626	279220	2.265	2.265	24	19	91	19
Ed_C09_B	ED	C	36	16	9.037	15130	0.059729	1031	170.1	0.165	274555	2.265	2.265	24	19	91	19
Ed_C09_B	ED	C	36	17	9.61	15130	0.0635162	1018	173.7	0.1706	271131	2.265	2.265	24	19	91	19
Ed_C09_B	ED	C	36	18	10.21	15130	0.0674818	1007	177.4	0.1762	268220	2.265	2.265	24	19	91	19
Ed_C09_B	ED	C	36	19	10.75	15130	0.0710509	998.3	179.3	0.1796	265844	2.265	2.265	24	19	91	19
Ed_C09_B	ED	C	36	20	11.32	15130	0.0748182	989	180.7	0.1827	263379	2.265	2.265	24	19	91	19
Ed_C09_B	ED	C	36	21	11.88	15130	0.0785195	978.4	180.3	0.1843	260566	2.265	2.265	24	19	91	19
Ed_C09_B	ED	C	36	22	12.45	15130	0.0822868	967.8	180	0.186	257722	2.265	2.265	24	19	91	19
Ed_C09_B	ED	C	36	23	13.03	15130	0.0861203	956.3	179.3	0.1875	254672	2.265	2.265	24	19	91	19
Ed_C09_B	ED	C	36	24	13.6	15130	0.0898876	943.6	179.4	0.1901	251293	2.265	2.265	24	19	91	19
Ed_C09_B	ED	C	36	25	14.17	15130	0.093655	931.2	180.6	0.1939	247976	2.265	2.265	24	19	91	19
Ed_C09_B	ED	C	36	26	14.75	15130	0.0974884	919.3	182	0.198	244817	2.265	2.265	24	19	91	19
Ed_C09_B	ED	C	36	27	15.32	15130	0.101256	908.5	183.8	0.2023	241952	2.265	2.265	24	19	91	19
Ed_C09_B	ED	C	36	28	15.88	15130	0.104957	898.6	184.9	0.2058	239311	2.265	2.265	24	19	91	19
Ed_C09_B	ED	C	36	29	16.45	15130	0.108724	890.1	185.3	0.2081	237030	2.265	2.265	24	19	91	19
Ed_C09_B	ED	C	36	30	17.01	15130	0.112426	881.2	185.2	0.2101	234683	2.265	2.265	24	19	91	19
Ed_C13_A	ED	C	37	1	0.5	14540	0.00343879	1417	131.5	0.0928	239457	1.775	1.763	30	25	84	25
Ed_C13_A	ED	C	37	2	1.068	14540	0.00734525	1378	134.9	0.09793	232867	1.775	1.763	30	25	84	25
Ed_C13_A	ED	C	37	3	1.636	14540	0.0112517	1356	136.8	0.1009	229216	1.775	1.763	30	25	84	25
Ed_C13_A	ED	C	37	4	2.207	14540	0.0151788	1341	137.7	0.1026	226731	1.775	1.763	30	25	84	25
Ed_C13_A	ED	C	37	5	2.779	14540	0.0191128	1326	151.9	0.1146	224100	1.775	1.763	30	25	84	25
Ed_C13_A	ED	C	37	6	3.343	14540	0.0229917	1293	151	0.1168	218581	1.775	1.763	30	25	84	25
Ed_C13_A	ED	C	37	7	3.916	14540	0.0269326	1287	153.4	0.1192	217540	1.775	1.763	30	25	84	25
Ed_C13_A	ED	C	37	8	4.481	14540	0.0308184	1262	166	0.1315	213384	1.775	1.763	30	25	84	25
Ed_C13_A	ED	C	37	9	5.052	14540	0.0347455	1251	159.7	0.1276	211513	1.775	1.763	30	25	84	25
Ed_C13_A	ED	C	37	10	5.62	14540	0.038652	1230	170.9	0.1389	207952	1.775	1.763	30	25	84	25
Ed_C13_A	ED	C	37	11	6.193	14540	0.0425928	1225	172.5	0.1408	207041	1.775	1.763	30	25	84	25
Ed_C13_A	ED	C	37	12	6.762	14540	0.0465062	1205	168.5	0.1398	203694	1.775	1.763	30	25	84	25
Ed_C13_A	ED	C	37	13	7.328	14540	0.0503989	1187	177.8	0.1498	200621	1.775	1.763	30	25	84	25
Ed_C13_A	ED	C	37	14	7.899	14540	0.054326	1181	181.2	0.1533	199687	1.775	1.763	30	25	84	25
Ed_C13_A	ED	C	37	15	8.467	14540	0.0582325	1166	182.5	0.1565	197106	1.775	1.763	30	25	84	25
Ed_C13_A	ED	C	37	16	9.036	14540	0.0621458	1151	179.8	0.1562	194641	1.775	1.763	30	25	84	25
Ed_C13_A	ED	C	37	17	9.611	14540	0.0661004	1137	183.8	0.1616	192182	1.775	1.763	30	25	84	25
Ed_C13_A	ED	C	37	18	10.18	14540	0.0700138	1127	188.1	0.1669	190460	1.775	1.763	30	25	84	25
Ed_C13_A	ED	C	37	19	10.75	14540	0.073934	1117	191.8	0.1718	188731	1.775	1.763	30	25	84	25
Ed_C13_A	ED	C	37	20	11.32	14540	0.0778542	1107	194	0.1753	187151	1.775	1.763	30	25	84	25
Ed_C13_A	ED	C	37	21	11.88	14540	0.0817056	1098	195.4	0.178	185557	1.775	1.763	30	25	84	25
Ed_C13_A	ED	C	37	22	12.45	14540	0.0856259	1089	195.8	0.1798	184030	1.775	1.763	30	25	84	25
Ed_C13_A	ED	C	37	23	13.02	14540	0.0895461	1079	195.4	0.1811	182390	1.775	1.763	30	25	84	25
Ed_C13_A	ED	C	37	24	13.59	14540	0.0934663	1069	195.7	0.1831	180676	1.775	1.763	30	25	84	25
Ed_C13_A	ED	C	37	25	14.16	14540	0.0973865	1058	197.2	0.1863	178906	1.775	1.763	30	25	84	25
Ed_C13_A	ED	C	37	26	14.76	14540	0.101513	1047	198.6	0.1897	177004	1.775	1.763	30	25	84	25
Ed_C13_A	ED	C	37	27	15.3	14540	0.105227	1039	201.1	0.1935	175653	1.775	1.763	30	25	84	25
Ed_C13_A	ED	C	37	28	15.87	14540	0.109147	1032	203.5	0.1971	174479	1.775	1.763	30	25	84	25
Ed_C13_A	ED	C	37	29	16.44	14540	0.113067	1026	204.7	0.1995	173495	1.775	1.763	30	25	84	25
Ed_C13_A	ED	C	37	30	17	14540	0.116919	1021	205.3	0.2011	172553	1.775	1.763	30	25	84	25
Ed_C13_B	ED	C	37	1	0.5	14960	0.00334225	1447	137.7	0.09514	239077	1.773	1.775	30	25	96	25
Ed_C13_B	ED	C	37	2	1.069	14960	0.00714572	1425	150.2	0.1054	235495	1.773	1.775	30	25	96	25
Ed_C13_B	ED	C	37	3	1.637	14960	0.0109425	1412	160.1	0.1133	233344	1.773	1.775	30	25	96	25
Ed_C13_B	ED	C	37	4	2.206	14960	0.014746	1393	155.7	0.1117	230206	1.773	1.775	30	25	96	25
Ed_C13_B	ED	C	37	5	2.775	14960	0.0185495	1369	153.9	0.1124	226161	1.773	1.775	30	25	96	25
Ed_C13_B	ED	C	37	6	3.348	14960	0.0223797	1357	163.2	0.1203	224181	1.773	1.775	30	25	96	25
Ed_C13_B	ED	C	37	7	3.912	14960	0.0261497	1327	166.5	0.1255	219167	1.773	1.775	30	25	96	25
Ed_C13_B	ED	C	37	8	4.488	14960	0.03	1320	171.1	0.1296	218095	1.773	1.775	30	25	96	25
Ed_C13_B	ED	C	37	9	5.051	14960	0.0337634	1292	172	0.133	213540	1.773	1.775	30	25	96	25
Ed_C13_B	ED	C	37	10	5.619	14960	0.0375602	1283	182.9	0.1426	211984	1.773	1.775	30	25	96	25
Ed_C13_B	ED	C	37	11	6.19	14960	0.041377	1262	174.9	0.1387	208458	1.773	1.775	30	25	96	25
Ed_C13_B	ED	C	37	12	6.757	14960	0.0451671	1245	185.6	0.1491	205647	1.773	1.775	30	25	96	25
Ed_C13_B	ED	C	37	13	7.334	14960	0.0490241	1237	186.3	0.1507	204300	1.773	1.775	30	25	96	25
Ed_C13_B	ED	C	37	14	7.901	14960	0.0528142	1221	183	0.1499	201667	1.773	1.775	30	25	96	25
Ed_C13_B	ED	C	37	15	8.47	14960	0.0566176	1201	184.6	0.1537	198467	1.773	1.775	30	25	96	25
Ed_C13_B	ED	C	37	16	9.025	14960	0.0603275	1190	193.2	0.1624	196558	1.773	1.775	30	25	96	25
Ed_C13_B	ED	C	37	17	9.611	14960	0.0642447	1178	195	0.1655	194633	1.773	1.775	30	25	96	25
Ed_C13_B	ED	C	37	18	10.18	14960	0.0680481	1167	195	0.1671	192881	1.773	1.775	30	25	96	25
Ed_C13_B	ED	C	37	19	10.75	14960	0.0718583	1155	194.8	0.1687	190838	1.773	1.775	30	25	96	25
Ed_C13_B	ED	C	37	20	11.32	14960	0.0756684	1142	194.3	0.1701	188764	1.773	1.775	30	25	96	25
Ed_C13_B	ED	C	37	21	11.89	14960	0.0794786	1129	195	0.1727	186568	1.773	1.775	30	25	96	25
Ed_C13_B	ED	C	37	22	12.45	14960	0.0832219	1117	196.9	0.1762	184556	1.773	1.775	30	25	96	25
Ed_C13_B	ED	C	37	23	13.03	14960	0.0870989	1106	199.4	0.1802	182747	1.773	1.775	30	25	96	25
Ed_C13_B	ED	C	37	24	13.6	14960	0.0909091	1096	202.2	0.1845	181076	1.773	1.775	30	25	96	25
Ed_C13_B	ED	C	37	25	14.16	14960	0.0946524	1088	204.3	0.1878	179681	1.773	1.775	30	25	96	25
Ed_C13_B	ED	C	37	26	14.73	14960	0.0984626	1080	205.2	0.19	178484	1.773	1.775	30	25	96	25
Ed_C13_B	ED	C	37	27	15.3	14960	0.102273	1073	205.5	0.1915	177290	1.773	1.775	30	25	96	25
Ed_C13_B	ED	C	37	28	15.89	14960	0.106217	1064	205.9	0.1936	175756	1.773	1.775	30	25	96	25
Ed_C13_B	ED	C	37	29	16.44	14960	0.109893	1058	204.6	0.1935	174764	1.773	1.775	30	25	96	25
Ed_C13_B	ED	C	37	30	17.01	14960	0.113703	1049	204.9	0.1953	173285	1.773	1.775	30	25	96	25
Ed_C15_A	ED	C	38	1	0.5	15050	0.00332226	1364	132.2	0.09693	347731	2.205	2.215	26	21	93	22
Ed_C15_A	ED	C	38	2	1.069	15050	0.00710299	1367	135.1	0.09881	348411	2.205	2.215	26	21	93	22
Ed_C15_A	ED	C	38	3	1.64	15050	0.010897	1325	137.6	0.1038	337757	2.205	2.215	26	21	93	22
Ed_C15_A	ED	C	38	4	2.211	15050	0.014691	1308	144.6	0.1106	333350	2.205	2.215	26	21	93	22
Ed_C15_A	ED	C	38	5	2.778	15050	0.0184585	1273	167	0.1312	324397	2.205	2.215	26	21	93	22
Ed_C15_A	ED	C	38	6	3.344	15050	0.0222193	1251	154.5	0.1235	318920	2.205	2.215	26	21	93	22
Ed_C15_A	ED	C	38	7	3.915	15050	0.0260133	1237	170.6	0.138	315221	2.205	2.215	26	21	93	22
Ed_C15_A	ED	C	38	8	4.483	15050	0.0297874	1211	162.8	0.1344	308760	2.205	2.215	26	21	93	22
Ed_C15_A	ED	C	38	9	5.055	15050	0.033588	1191	180.5	0.1516	303528	2.205	2.215	26	21	93	22
Ed_C15_A	ED	C	38	10	5.622	15050	0.0373555	1177	169.9	0.1443	299973	2.205	2.215	26	21	93	22
Ed_C15_A	ED	C	38	11	6.192	15050	0.0411429	1155	180.7	0.1565	294334	2.205	2.215	26	21	93	22
Ed_C15_A	ED	C	38	12	6.763	15050	0.0449369	1145	180.9	0.1581	291725	2.205	2.215	26	21	93	22
Ed_C15_A	ED	C	38	13	7.335	15050	0.0487375	1129	176.7	0.1565	287810	2.205	2.215	26	21	93	22
[truncated: 1,127 more rows]
